# Supplementary material for: The RNAi Mechanism Regulates a New Exonuclease Gene Involved in the Virulence of Mucorales
Source: Preprints.org preprint supplement (doi:10.20944/preprints202101.0277.v1), 2021-01-14
Supplement: Supplementary file 1 [file TableS1.xlsx]

## Sheet: Sheet1
GeneID	log2FC	pvalue	dcl1dcl2_log2CPM	Av_log2CPM	Vi_log2CPM	seq	start	end	strand
1000144	0.32879	0.748945	-0.304198	-3.32193	1.82817	scaffold_1	27987	29095	+
1000257	0.06	0.06	-1.62613	-3.32193	-3.32193	scaffold_1	51229	51874	-
1000450	0.34073	0.769673	6.2225	7.85408	8.25443	scaffold_1	88371	89440	+
1000481	0.06	0.06	-1.88916	-3.32193	-3.32193	scaffold_1	95472	96385	+
1000605	0.598909	0.672767	0.596267	2.26912	3.82817	scaffold_1	140364	141766	+
1001341	-0.651973	0.647174	4.73143	5.26912	4.15009	scaffold_1	290170	292797	-
1001562	-0.474771	0.642431	2.60909	2.26912	-3.32193	scaffold_1	324553	326111	+
1001622	-0.280312	0.836773	3.5371	5.72855	5.2876	scaffold_1	332684	335803	-
1001801	0.178514	0.894103	3.35877	2.26912	2.82817	scaffold_1	356873	358798	+
1001976	0.63309	0.577421	-1.21109	-3.32193	2.82817	scaffold_1	371843	373063	-
1001998	7.49854e-08	1	2.81128	3.85408	3.82817	scaffold_1	378943	379735	-
1002113	0.06	0.06	-1.88916	-3.32193	-3.32193	scaffold_1	400243	401192	+
1002383	0.63309	0.577421	3.00808	-3.32193	2.82817	scaffold_1	456740	458848	-
1002883	-0.018867	0.986197	-1.40373	11.591	11.5424	scaffold_1	541550	542321	+
1002954	7.49854e-08	1	2.51683	3.85408	3.82817	scaffold_1	583202	584461	-
1003030	0.32879	0.748945	3.06504	-3.32193	1.82817	scaffold_1	598952	600273	-
1003148	1.26608	0.352142	3.20676	-3.32193	4.15009	scaffold_1	614143	615469	+
1003388	0.491032	0.671211	7.44935	7.99704	8.58305	scaffold_1	630835	633002	+
1003493	-0.828781	0.496118	1.6218	3.26912	-3.32193	scaffold_1	650233	651899	+
1003497	-0.229706	0.873664	3.88167	4.59105	4.15009	scaffold_1	651691	652912	+
1003673	0.32879	0.748945	2.23186	-3.32193	1.82817	scaffold_1	691390	693104	+
1003987	0.178514	0.894103	2.94878	2.26912	2.82817	scaffold_1	749627	757094	-
1004062	0.32879	0.748945	2.59627	-3.32193	1.82817	scaffold_1	761657	763271	-
1004224	-1.12564	0.392724	2.94878	3.85408	-3.32193	scaffold_1	821217	822677	-
1004361	0.875562	0.48389	2.43277	-3.32193	3.41313	scaffold_1	845733	847181	+
1004570	7.49854e-08	1	1.46134	3.85408	3.82817	scaffold_1	871988	873678	-
1004936	-0.910274	0.436024	-1.21109	8.92733	7.7589	scaffold_1	936549	937507	-
1005242	0.63309	0.577421	2.98858	-3.32193	2.82817	scaffold_1	975881	977135	-
1005464	-0.474771	0.642431	4.08812	2.26912	-3.32193	scaffold_1	1029669	1031255	-
1005647	0.598909	0.672767	3.20676	2.26912	3.82817	scaffold_1	1054368	1055687	-
1006157	1.47804	0.308673	5.99958	2.26912	5.2876	scaffold_1	1146481	1148341	-
1006296	0.657952	0.632697	4.82783	4.85408	5.82817	scaffold_1	1181688	1182981	-
1006313	0.116917	0.930794	6.50316	5.59105	5.73506	scaffold_1	1182983	1185207	-
1006464	0.235761	0.864885	6.45602	5.07647	5.41313	scaffold_1	1224411	1225094	+
1006557	4.6015	0.000929834	2.50316	5.26912	13.8047	scaffold_1	1232659	1234358	+
1006624	-0.619757	0.660175	4.07893	5.43904	4.41313	scaffold_1	1253305	1255480	-
1007237	-1.12564	0.392724	4.06968	3.85408	-3.32193	scaffold_1	1379628	1381032	-
1007430	0.06	0.06	2.7776	-3.32193	-3.32193	scaffold_1	1398878	1400184	-
1007461	0.06	0.06	4.38882	-3.32193	-3.32193	scaffold_1	1406864	1408093	+
1007491	-0.212381	0.88376	5.28277	4.26912	3.82817	scaffold_1	1410508	1416143	-
1007523	-0.474771	0.642431	3.83876	2.26912	-3.32193	scaffold_1	1422780	1423992	+
1007787	0.178514	0.894103	3.26465	2.26912	2.82817	scaffold_1	1461914	1463374	+
1008021	-0.444473	0.743451	-1.62613	3.26912	1.82817	scaffold_1	1507137	1508534	-
1008037	1.42614	0.304548	3.58981	-3.32193	4.41313	scaffold_1	1505203	1506692	-
1008072	-0.15499	0.912222	3.53038	3.26912	2.82817	scaffold_1	1500527	1504281	-
1008178	-0.474771	0.642431	3.33581	2.26912	-3.32193	scaffold_1	1520819	1522422	-
1008541	0.598909	0.672767	3.25652	2.26912	3.82817	scaffold_1	1584896	1587855	-
1008683	0.400258	0.743938	5.26465	6.79268	7.2876	scaffold_1	1612905	1613930	-
1008830	0.162249	0.911088	5.22354	3.85408	4.15009	scaffold_1	1644698	1648446	+
1008919	-0.444473	0.743451	0.646893	3.26912	1.82817	scaffold_1	1671000	1672449	-
1009111	-0.444473	0.743451	3.13764	3.26912	1.82817	scaffold_1	1721444	1722254	-
1009291	0.06	0.06	3.27273	-3.32193	-3.32193	scaffold_1	1740769	1741917	+
1009355	0.178514	0.894103	2.11084	2.26912	2.82817	scaffold_1	1741918	1742985	+
1009415	-1.12564	0.392724	2.40362	3.85408	-3.32193	scaffold_1	1747088	1748565	+
1009423	-2.75911	0.0340492	-3.32193	9.19986	5.2876	scaffold_1	1753458	1754030	-
1009439	0.06	0.06	3.71965	-3.32193	-3.32193	scaffold_1	1763509	1764774	-
1009498	-0.101568	0.935242	6.33484	2.26912	1.82817	scaffold_1	1776073	1777531	-
1009543	-0.15499	0.912222	2.65928	3.26912	2.82817	scaffold_1	1773239	1775521	-
1009782	0.32879	0.748945	0.876375	-3.32193	1.82817	scaffold_1	1823902	1826229	+
1009856	0.0931958	0.948616	3.24012	4.26912	4.41313	scaffold_1	1826814	1827952	-
1010032	0.0687202	0.956586	6.67842	6.51705	6.58305	scaffold_1	1857708	1862245	-
1010562	-0.828781	0.496118	2.71965	3.26912	-3.32193	scaffold_1	1978043	1980738	+
1010568	0.32879	0.748945	2.68373	-3.32193	1.82817	scaffold_1	1975809	1978590	+
1011291	-2.27916	0.0903238	1.6958	7.55452	4.15009	scaffold_1	2113754	2115343	+
1011517	0.0931958	0.948616	5.5817	4.26912	4.41313	scaffold_1	2169352	2173753	-
1011726	0.06	0.06	2.35877	-3.32193	-3.32193	scaffold_1	2205915	2206669	-
1011814	0.06	0.06	-3.21109	-3.32193	-3.32193	scaffold_1	2225596	2226507	+
1011819	0.0931958	0.948616	4.80572	4.26912	4.41313	scaffold_1	2235111	2236825	-
1011902	0.32879	0.748945	2.6958	-3.32193	1.82817	scaffold_1	2275579	2276301	-
1011964	0.06	0.06	2.1983	-3.32193	-3.32193	scaffold_1	2287232	2288622	-
1012566	0.178514	0.894103	2.81128	2.26912	2.82817	scaffold_1	2416068	2417486	-
1012797	-0.474771	0.642431	-0.626126	2.26912	-3.32193	scaffold_1	2459328	2460779	-
1012821	0.0701075	0.96092	4.90785	3.26912	3.41313	scaffold_1	2466708	2470105	-
1012831	-0.474771	0.642431	2.91819	2.26912	-3.32193	scaffold_1	2473150	2474096	-
1012891	0.32879	0.748945	2.01773	-3.32193	1.82817	scaffold_1	2486673	2487807	+
1013148	0.767871	0.592441	5.57027	2.26912	4.15009	scaffold_1	2528715	2529716	+
1013367	0.767871	0.592441	5.32419	2.26912	4.15009	scaffold_1	2571446	2573357	+
1013445	0.32879	0.748945	1.46134	-3.32193	1.82817	scaffold_1	2593858	2594818	-
1013555	0.32879	0.748945	0.0368393	-3.32193	1.82817	scaffold_1	2614637	2616317	+
1013710	0.752684	0.600339	4.15086	3.85408	5.15009	scaffold_1	2628217	2630263	+
1014106	0.06	0.06	3.71965	-3.32193	-3.32193	scaffold_1	2678288	2680253	-
1014277	0.516372	0.702063	5.05804	5.26912	5.99809	scaffold_1	2699898	2701727	-
1014623	-0.935378	0.495683	5.54213	6.07647	4.63552	scaffold_1	2793290	2794240	-
1014789	1.28363	0.377001	4.27675	2.26912	4.99809	scaffold_1	2833095	2835624	+
1015199	-0.828781	0.496118	2.59627	3.26912	-3.32193	scaffold_1	2900849	2901741	-
1015252	-0.101568	0.935242	3.61546	2.26912	1.82817	scaffold_1	2912121	2914864	-
1015296	-0.828781	0.496118	-0.626126	3.26912	-3.32193	scaffold_1	2933422	2934511	+
1015490	-0.18886	0.896173	2.26465	3.85408	3.41313	scaffold_1	2994706	2996826	-
1015495	0.06	0.06	-3.32193	-3.32193	-3.32193	scaffold_1	2996880	2997340	+
1015529	0.06	0.06	2.95884	-3.32193	-3.32193	scaffold_1	3010658	3011942	-
1015618	0.0701075	0.96092	2.50316	3.26912	3.41313	scaffold_1	3023116	3025827	+
1015628	0.06	0.06	-0.304198	-3.32193	-3.32193	scaffold_1	3025829	3026715	-
1015631	0.767871	0.592441	2.0557	2.26912	4.15009	scaffold_1	3021921	3023485	+
1015731	0.06	0.06	3.25652	-3.32193	-3.32193	scaffold_1	3053921	3054765	-
1015759	-0.101568	0.935242	3.28076	2.26912	1.82817	scaffold_1	3057149	3057769	+
1016123	0.0701075	0.96092	2.86573	3.26912	3.41313	scaffold_1	3126004	3127840	+
1016860	-0.474771	0.642431	1.40362	2.26912	-3.32193	scaffold_1	3270585	3271377	-
1016878	0.91755	0.52516	4.72555	2.26912	4.41313	scaffold_1	3276760	3278191	-
1016893	7.49854e-08	1	0.432768	3.85408	3.82817	scaffold_1	3284104	3284493	+
1016922	-0.101568	0.935242	2.70778	2.26912	1.82817	scaffold_1	3289228	3291640	+
1017235	0.875562	0.48389	2.70778	-3.32193	3.41313	scaffold_1	3379492	3381551	-
1017433	-0.361751	0.781584	4.90265	6.35658	5.82817	scaffold_1	3411532	3413683	-
1017502	0.06	0.06	-3.32193	-3.32193	-3.32193	scaffold_1	3423048	3423635	+
1017511	-0.444473	0.743451	3.09269	3.26912	1.82817	scaffold_1	3428035	3430623	+
1017730	0.06	0.06	0.0368393	-3.32193	-3.32193	scaffold_1	3474810	3475535	-
1017731	0.06	0.06	1.28076	-3.32193	-3.32193	scaffold_1	3473902	3474808	-
1017934	-0.101568	0.935242	2.6958	2.26912	1.82817	scaffold_1	3524693	3526626	+
1018102	0.06	0.06	3.40362	-3.32193	-3.32193	scaffold_1	3546799	3549141	-
1018214	0.104958	0.94075	4.65	4.85408	4.99809	scaffold_1	3587398	3589341	+
1018652	0.32879	0.748945	4.61228	-3.32193	1.82817	scaffold_1	3678770	3681785	+
1018844	0.06	0.06	0.248343	-3.32193	-3.32193	scaffold_1	3737466	3738372	-
1018972	-0.474771	0.642431	1.81128	2.26912	-3.32193	scaffold_1	3753256	3754884	+
1019092	0.104958	0.94075	5.25244	4.85408	4.99809	scaffold_1	3779439	3785963	-
1019394	-1.65791	0.193418	-0.626126	7.91297	5.63552	scaffold_1	3836049	3837076	+
1019498	-0.229706	0.873664	6.26262	4.59105	4.15009	scaffold_1	3865248	3867106	-
1019574	0.178514	0.894103	2.5571	2.26912	2.82817	scaffold_1	3893884	3895011	+
1019657	-0.418177	0.770736	2.58333	3.85408	2.82817	scaffold_1	3890918	3893406	-
1020112	-0.101568	0.935242	0.646893	2.26912	1.82817	scaffold_1	4007145	4008775	-
1020135	-0.0864974	0.952073	2.59627	4.59105	4.41313	scaffold_1	4016135	4016665	-
1020226	-0.474771	0.642431	0.489352	2.26912	-3.32193	scaffold_1	4030240	4031878	-
1020502	0.319137	0.802943	4.55046	6.17601	6.58305	scaffold_1	4062304	4065535	-
1020520	0.752684	0.600339	3.58981	3.85408	5.15009	scaffold_1	4071932	4074255	+
1020694	0.405441	0.770526	3.60269	2.26912	3.41313	scaffold_1	4086229	4087305	-
1020813	0.06	0.06	1.28076	-3.32193	-3.32193	scaffold_1	4120544	4121584	-
1020826	0.06	0.06	1.31247	-3.32193	-3.32193	scaffold_1	4123076	4124023	-
1020827	-0.474771	0.642431	-0.751657	2.26912	-3.32193	scaffold_1	4122504	4123075	-
1020880	-0.0330454	0.981211	4.79734	5.07647	4.99809	scaffold_1	4139666	4142371	-
1020912	0.06	0.06	1.14646	-3.32193	-3.32193	scaffold_1	4154217	4154957	-
1020917	-0.15499	0.912222	4.82233	3.26912	2.82817	scaffold_1	4151427	4154216	-
1020944	-0.474771	0.642431	0.11084	2.26912	-3.32193	scaffold_1	4156143	4156678	-
1020960	7.49854e-08	1	3.59627	3.85408	3.82817	scaffold_1	4158635	4159530	+
1021101	1.08435	0.4107	2.68373	-3.32193	3.82817	scaffold_1	4178616	4179731	-
1021114	0.178514	0.894103	3.32029	2.26912	2.82817	scaffold_1	4177635	4178698	+
1021308	-0.101568	0.935242	3.27273	2.26912	1.82817	scaffold_1	4213238	4214053	-
1021456	0.639386	0.561834	0.646893	11.9166	12.665	scaffold_1	4244691	4248155	+
1021797	-0.15499	0.912222	5.24218	3.26912	2.82817	scaffold_1	4344407	4347367	-
1021978	-0.15499	0.912222	4.37011	3.26912	2.82817	scaffold_1	4379211	4382151	-
1022126	0.875562	0.48389	3.16395	-3.32193	3.41313	scaffold_1	4424484	4426654	-
1022257	0.06	0.06	1.43277	-3.32193	-3.32193	scaffold_1	4441788	4444125	-
1022474	0.06	0.06	5.08812	-3.32193	-3.32193	scaffold_1	4496805	4498155	+
1022501	0.460268	0.730846	7.78891	5.43904	6.07609	scaffold_1	4508857	4509696	-
1022662	0.06	0.06	2.5571	-3.32193	-3.32193	scaffold_1	4546144	4547143	-
1022704	0.06	0.06	0.743108	-3.32193	-3.32193	scaffold_1	4557440	4558840	+
1022770	0.32879	0.748945	5.42735	-3.32193	1.82817	scaffold_1	4588022	4590827	+
1022837	-0.18886	0.896173	5.42916	3.85408	3.41313	scaffold_1	4583591	4588118	+
1023283	-0.474771	0.642431	-2.62613	2.26912	-3.32193	scaffold_1	4662338	4663251	-
1023308	4.56134	0.00113412	-0.304198	3.26912	12.6258	scaffold_1	4670364	4671424	-
1023431	-0.393788	0.785857	4.72849	4.59105	3.82817	scaffold_1	4707488	4711737	-
1023508	0.06	0.06	1.57027	-3.32193	-3.32193	scaffold_1	4720988	4723106	+
1023853	0.566673	0.696489	4.32807	3.26912	4.41313	scaffold_1	4763400	4766731	-
1024015	7.49854e-08	1	2.21518	3.85408	3.82817	scaffold_1	4801198	4803096	-
1024443	-0.101568	0.935242	1.6958	2.26912	1.82817	scaffold_1	4871777	4872672	+
1024535	0.06	0.06	2.84419	-3.32193	-3.32193	scaffold_1	4884615	4886118	+
1024541	-0.474771	0.642431	3.46839	2.26912	-3.32193	scaffold_1	4883080	4884376	+
1024547	-0.474771	0.642431	0.181229	2.26912	-3.32193	scaffold_1	4884177	4884526	+
1024626	-0.243014	0.865201	6.08468	4.85408	4.41313	scaffold_1	4899510	4900706	-
1024711	0.06	0.06	-0.211088	-3.32193	-3.32193	scaffold_1	4926729	4927504	+
1024851	0.421972	0.771084	3.28876	3.26912	4.15009	scaffold_1	4979424	4980192	-
1025256	-0.720252	0.608938	4.88957	3.85408	1.82817	scaffold_1	5062198	5063738	+
1025324	0.25854	0.85789	3.21518	3.26912	3.82817	scaffold_1	5071334	5074931	-
1025459	-0.0495273	0.972754	1.48935	4.26912	4.15009	scaffold_1	5100174	5100842	+
1025765	-0.101568	0.935242	3.18979	2.26912	1.82817	scaffold_1	5168838	5169499	-
1025950	0.06	0.06	-1.21109	-3.32193	-3.32193	scaffold_1	5213040	5213947	-
1026398	0.32879	0.748945	3.38882	-3.32193	1.82817	scaffold_1	5345940	5347684	-
1026854	0.405441	0.770526	4.42554	2.26912	3.41313	scaffold_1	5438718	5440174	+
1026946	0.598909	0.672767	3.80572	2.26912	3.82817	scaffold_1	5463112	5464861	-
1027279	0.63309	0.577421	4.30461	-3.32193	2.82817	scaffold_1	5556888	5558655	-
1028030	-0.418177	0.770736	5.00566	3.85408	2.82817	scaffold_10	71600	74440	+
1028046	0.06	0.06	2.78891	-3.32193	-3.32193	scaffold_10	77537	78369	+
1028083	0.875562	0.48389	0.181229	-3.32193	3.41313	scaffold_10	83532	85245	-
1028269	-0.444473	0.743451	2.95884	3.26912	1.82817	scaffold_10	130013	131393	+
1028381	-0.474771	0.642431	0.312474	2.26912	-3.32193	scaffold_10	144529	145375	+
1028382	-0.0495273	0.972754	4.2277	4.26912	4.15009	scaffold_10	145377	149861	+
1028401	-0.212381	0.88376	1.5438	4.26912	3.82817	scaffold_10	151815	153162	-
1028667	0.06	0.06	0.833306	-3.32193	-3.32193	scaffold_10	204837	205441	-
1028673	-0.651973	0.647174	4.32807	5.26912	4.15009	scaffold_10	206662	208771	+
1028849	0.61781	0.621321	6.18445	6.35658	7.15009	scaffold_10	220958	222206	-
1029106	-1.12564	0.392724	3.96384	3.85408	-3.32193	scaffold_10	279906	281426	+
1029238	0.162021	0.896027	7.3823	6.72855	6.91563	scaffold_10	341297	345337	-
1029294	-0.101568	0.935242	-1.88916	2.26912	1.82817	scaffold_10	364425	365413	-
1029295	0.63309	0.577421	4.06968	-3.32193	2.82817	scaffold_10	362645	364424	-
1029296	0.06	0.06	-2.62613	-3.32193	-3.32193	scaffold_10	362224	362643	+
1029343	-0.377844	0.788563	7.09326	5.26912	4.63552	scaffold_10	383021	383944	+
1029548	0.178514	0.894103	4.14206	2.26912	2.82817	scaffold_10	400051	402492	+
1029850	0.598909	0.672767	2.07431	2.26912	3.82817	scaffold_10	470195	472292	+
1029939	0.178514	0.894103	3.1983	2.26912	2.82817	scaffold_10	481355	484019	-
1029978	0.178514	0.894103	4.55046	2.26912	2.82817	scaffold_10	493513	494585	+
1030073	0.178514	0.894103	3.1983	2.26912	2.82817	scaffold_10	502821	504871	+
1030517	0.405441	0.770526	5.5488	2.26912	3.41313	scaffold_10	600417	603801	-
1030798	0.32879	0.748945	2.59627	-3.32193	1.82817	scaffold_10	673567	674727	-
1030799	-0.7483	0.605723	4.17262	4.85408	3.41313	scaffold_10	670998	673565	-
1030806	0.405441	0.770526	2.83331	2.26912	3.41313	scaffold_10	668632	671002	+
1030922	-0.444473	0.743451	1.95884	3.26912	1.82817	scaffold_10	684245	685800	-
1030927	0.32879	0.748945	1.83331	-3.32193	1.82817	scaffold_10	685908	686592	-
1031474	-0.474771	0.642431	2.5571	2.26912	-3.32193	scaffold_10	823408	824160	-
1031478	-0.212381	0.88376	3.7776	4.26912	3.82817	scaffold_10	820006	822865	-
1031723	0.32879	0.748945	2.57027	-3.32193	1.82817	scaffold_10	884285	885816	+
1031848	-0.474771	0.642431	1.11084	2.26912	-3.32193	scaffold_10	916181	918281	+
1031850	-1.87586	0.151593	1.43277	7.66144	4.99809	scaffold_10	918935	920709	+
1031916	-0.444473	0.743451	1.46134	3.26912	1.82817	scaffold_10	932485	933204	+
1032001	-0.828781	0.496118	0.248343	3.26912	-3.32193	scaffold_10	932803	933829	-
1032040	-0.0864974	0.952073	3.83331	4.59105	4.41313	scaffold_10	943955	944658	-
1032096	0.537883	0.706075	-0.751657	4.26912	5.15009	scaffold_10	942981	944022	-
1032130	0.32879	0.748945	-2.62613	-3.32193	1.82817	scaffold_10	940363	941765	-
1032248	0.25854	0.85789	1.87637	3.26912	3.82817	scaffold_10	974294	975108	-
1032385	0.0701075	0.96092	4.71372	3.26912	3.41313	scaffold_10	986388	988474	-
1032504	-2.01842	0.16257	-4.21109	5.85408	1.82817	scaffold_10	995344	996300	+
1032567	0.201417	0.886099	4.855	4.85408	5.15009	scaffold_11	1110	3117	+
1032995	0.178514	0.894103	1.51683	2.26912	2.82817	scaffold_11	123066	123745	-
1033236	-0.18886	0.896173	1.99837	3.85408	3.41313	scaffold_11	179056	180333	+
1033239	0.875562	0.48389	1.24834	-3.32193	3.41313	scaffold_11	181843	182755	+
1033281	0.451407	0.745374	6.47716	4.85408	5.52861	scaffold_11	183268	184482	+
1033815	0.411296	0.756609	5.12207	5.59105	6.15009	scaffold_11	280358	281941	-
1033839	0.32879	0.748945	2.65928	-3.32193	1.82817	scaffold_11	292784	293599	-
1034038	0.32879	0.748945	1.43277	-3.32193	1.82817	scaffold_11	314377	316901	-
1034244	0.305167	0.833475	4.49627	3.85408	4.41313	scaffold_11	351744	354160	-
1034283	0.62755	0.658826	5.73728	4.26912	5.2876	scaffold_11	363611	373425	+
1034341	0.06	0.06	-1.04116	-3.32193	-3.32193	scaffold_11	386758	387927	+
1034585	0.32879	0.748945	1.59627	-3.32193	1.82817	scaffold_11	448840	450007	+
1034791	0.162249	0.911088	-3.21109	3.85408	4.15009	scaffold_11	483677	484186	+
1034919	0.32879	0.748945	2.24834	-3.32193	1.82817	scaffold_11	525598	527088	+
1034923	-0.474771	0.642431	2.38882	2.26912	-3.32193	scaffold_11	529825	531563	+
1034967	0.06	0.06	1.76619	-3.32193	-3.32193	scaffold_11	536745	537953	-
1034978	0.178514	0.894103	2.5571	2.26912	2.82817	scaffold_11	534911	536879	+
1035134	0.37374	0.788778	7.19671	4.85408	5.41313	scaffold_11	586794	587640	-
1035562	-0.474771	0.642431	3.10179	2.26912	-3.32193	scaffold_11	673055	674732	+
1035563	-0.101568	0.935242	5.45957	2.26912	1.82817	scaffold_11	674734	675908	+
1035691	0.313404	0.820388	9.25422	5.07647	5.52861	scaffold_11	687046	688026	-
1036002	-0.572456	0.67847	3.51683	5.72855	4.82817	scaffold_11	758422	760387	-
1036144	0.564432	0.671654	6.96134	5.43904	6.22048	scaffold_11	805436	809097	+
1036179	0.405441	0.770526	4.11983	2.26912	3.41313	scaffold_11	817501	819581	+
1036309	-2.86853	0.0480299	-4.21109	6.43904	-3.32193	scaffold_11	842275	843399	-
1036472	0.181928	0.892154	8.05775	5.59105	5.82817	scaffold_12	3014	8976	-
1036708	-0.0495273	0.972754	4.99348	4.26912	4.15009	scaffold_12	40855	41956	+
1036974	-0.229706	0.873664	3.35115	4.59105	4.15009	scaffold_12	100885	102065	+
1037039	1.19741	0.405705	5.92205	3.26912	5.41313	scaffold_12	108391	112186	-
1037065	0.32879	0.748945	2.90785	-3.32193	1.82817	scaffold_12	123966	126448	-
1037405	0.405441	0.770526	1.59627	2.26912	3.41313	scaffold_12	200158	200825	-
1037666	0.814409	0.57473	-2.21109	3.26912	4.82817	scaffold_12	247109	248062	-
1037700	-0.444473	0.743451	3.53038	3.26912	1.82817	scaffold_12	256597	258188	+
1037701	0.32879	0.748945	2.73143	-3.32193	1.82817	scaffold_12	258189	259300	-
1037754	-2.68859	0.0376371	-4.21109	9.30254	5.52861	scaffold_12	264589	266114	+
1038027	-0.444473	0.743451	2.86573	3.26912	1.82817	scaffold_12	353777	355679	+
1038282	0.915191	0.455914	6.56863	6.59105	7.7589	scaffold_12	394195	395012	-
1038555	0.498234	0.684667	9.405	6.72855	7.35173	scaffold_12	437271	438156	-
1038681	1.42614	0.304548	4.44355	-3.32193	4.41313	scaffold_12	485545	489705	+
1038682	0.06	0.06	2.86573	-3.32193	-3.32193	scaffold_12	489706	491043	+
1038683	-0.742181	0.587918	3.45425	5.96956	4.82817	scaffold_12	491045	491632	-
1038857	0.0701075	0.96092	1.81128	3.26912	3.41313	scaffold_12	523028	524979	+
1038875	-0.403424	0.781224	3.43277	4.26912	3.41313	scaffold_12	520155	523026	+
1039593	0.178514	0.894103	1.87637	2.26912	2.82817	scaffold_12	667109	669044	+
1039618	-3.39491	0.0120258	0.489352	9.07647	3.82817	scaffold_12	671837	673630	+
1039780	0.605885	0.624828	6.40821	6.51705	7.2876	scaffold_12	711118	711836	+
1040408	0.405441	0.770526	1.07431	2.26912	3.41313	scaffold_13	51535	53254	+
1040488	-0.418177	0.770736	3.42554	3.85408	2.82817	scaffold_13	82499	84530	-
1041087	-0.474771	0.642431	1.6218	2.26912	-3.32193	scaffold_13	187674	188100	+
1041175	-0.474771	0.642431	1.6218	2.26912	-3.32193	scaffold_13	206921	207912	+
1041187	0.06	0.06	-0.510648	-3.32193	-3.32193	scaffold_13	207698	208301	-
1041294	-0.448996	0.721528	7.56246	6.91297	6.2876	scaffold_13	233626	239959	+
1041494	-1.12564	0.392724	2.11084	3.85408	-3.32193	scaffold_13	275727	277752	-
1041593	0.0409705	0.977196	4.21098	4.59105	4.63552	scaffold_13	295340	300912	-
1041780	-0.101568	0.935242	0.432768	2.26912	1.82817	scaffold_13	336082	337680	-
1041936	0.566673	0.696489	4.57355	3.26912	4.41313	scaffold_13	352548	355502	+
1042229	0.767871	0.592441	3.92846	2.26912	4.15009	scaffold_13	401371	403479	+
1042472	0.32879	0.748945	1.3435	-3.32193	1.82817	scaffold_13	454346	456393	+
1042502	-0.828781	0.496118	1.95884	3.26912	-3.32193	scaffold_13	456341	457545	+
1042724	0.06	0.06	2.51683	-3.32193	-3.32193	scaffold_13	537569	539693	-
1042909	2.2528	0.120481	-1.62613	-3.32193	5.63552	scaffold_13	582166	582806	+
1042943	0.06	0.06	-1.62613	-3.32193	-3.32193	scaffold_13	595664	596522	-
1043145	0.220597	0.878369	4.87902	4.26912	4.63552	scaffold_13	623860	626965	+
1043481	-0.720252	0.608938	-0.751657	3.85408	1.82817	scaffold_13	685548	685971	+
1043552	0.32879	0.748945	2.86573	-3.32193	1.82817	scaffold_13	699584	701476	+
1043738	-0.474771	0.642431	-0.510648	2.26912	-3.32193	scaffold_13	756140	758266	+
1043803	1.60646	0.258541	4.39254	3.26912	5.99809	scaffold_13	759820	761906	-
1044038	0.0701075	0.96092	5.19192	3.26912	3.41313	scaffold_14	34037	38351	+
1044090	0.566673	0.696489	4.96633	3.26912	4.41313	scaffold_14	60053	61155	-
1044166	0.63309	0.577421	3.25652	-3.32193	2.82817	scaffold_14	77364	78203	-
1044479	-0.720252	0.608938	2.74311	3.85408	1.82817	scaffold_14	145642	146623	-
1044510	-0.474771	0.642431	1.18123	2.26912	-3.32193	scaffold_14	151193	152367	-
1044593	0.06	0.06	-0.626126	-3.32193	-3.32193	scaffold_14	161131	162143	-
1044623	-0.15499	0.912222	3.21518	3.26912	2.82817	scaffold_14	174030	174818	-
1044671	-0.444473	0.743451	2.99837	3.26912	1.82817	scaffold_14	174850	176475	-
1044740	-0.474771	0.642431	-0.304198	2.26912	-3.32193	scaffold_14	193641	195056	-
1044767	-0.381831	0.788578	5.05101	5.07647	4.41313	scaffold_14	198424	199575	+
1044780	0.0701075	0.96092	4.70479	3.26912	3.41313	scaffold_14	197565	198607	+
1044848	0.566673	0.696489	1.21518	3.26912	4.41313	scaffold_14	207190	209415	-
1044947	-0.7483	0.605723	3.39624	4.85408	3.41313	scaffold_14	226523	228221	+
1044948	-0.474771	0.642431	2.5438	2.26912	-3.32193	scaffold_14	228223	228987	+
1045065	0.32879	0.748945	1.51683	-3.32193	1.82817	scaffold_14	247658	248477	-
1045108	0.0409705	0.977196	5.30066	4.59105	4.63552	scaffold_15	8714	10628	-
1045219	7.49854e-08	1	4.82233	3.85408	3.82817	scaffold_15	31919	35300	-
1045286	0.178514	0.894103	2.14646	2.26912	2.82817	scaffold_15	55956	59082	+
1045371	-0.950538	0.506991	0.0368393	4.26912	1.82817	scaffold_15	67184	67782	-
1045960	1.5684	0.265434	1.99837	-3.32193	4.63552	scaffold_17	27101	29348	-
1046233	0.06	0.06	2.24834	-3.32193	-3.32193	scaffold_19	10881	11834	+
1046558	0.372313	0.767741	5.58819	6.35658	6.82817	scaffold_2	54581	55417	-
1046559	-0.403424	0.781224	4.47191	4.26912	3.41313	scaffold_2	52266	54579	-
1046596	-0.474771	0.642431	1.43277	2.26912	-3.32193	scaffold_2	58246	59416	+
1046746	-0.444473	0.743451	0.0368393	3.26912	1.82817	scaffold_2	89619	90361	-
1046862	0.32879	0.748945	-3.32193	-3.32193	1.82817	scaffold_2	117754	118167	+
1046887	1.26608	0.352142	3.76046	-3.32193	4.15009	scaffold_2	126885	128030	+
1047052	-0.212381	0.88376	5.64845	4.26912	3.82817	scaffold_2	160284	163045	+
1047363	-0.15499	0.912222	2.83331	3.26912	2.82817	scaffold_2	225392	226282	+
1047366	0.32879	0.748945	0.596267	-3.32193	1.82817	scaffold_2	224210	225689	+
1047610	0.32879	0.748945	3.14646	-3.32193	1.82817	scaffold_2	258733	260055	-
1047616	0.32879	0.748945	0.918195	-3.32193	1.82817	scaffold_2	259844	260688	-
1047732	-0.288569	0.829181	4.29671	5.96956	5.52861	scaffold_2	275601	277397	+
1047760	0.32879	0.748945	1.28076	-3.32193	1.82817	scaffold_2	279698	281586	+
1048091	-0.474771	0.642431	0.11084	2.26912	-3.32193	scaffold_2	370656	372120	-
1048168	0.0701075	0.96092	5.80572	3.26912	3.41313	scaffold_2	386377	387935	+
1048174	7.49854e-08	1	3.6344	3.85408	3.82817	scaffold_2	390208	391329	-
1048178	-0.15499	0.912222	3.5637	3.26912	2.82817	scaffold_2	389313	390207	-
1048284	0.598909	0.672767	2.6958	2.26912	3.82817	scaffold_2	421871	423955	-
1048290	0.06	0.06	0.695802	-3.32193	-3.32193	scaffold_2	419598	420285	+
1048385	-0.15499	0.912222	3.95382	3.26912	2.82817	scaffold_2	445612	447266	-
1048957	0.32879	0.748945	0.876375	-3.32193	1.82817	scaffold_2	552680	555254	-
1048980	0.922019	0.524623	3.41827	3.26912	4.99809	scaffold_2	556678	558490	-
1049405	-0.434559	0.717305	8.40615	7.69538	7.11357	scaffold_2	619435	631360	+
1049613	0.0751601	0.95204	4.94373	6.66144	6.73506	scaffold_2	672268	673510	-
1049991	0.37374	0.788778	6.04512	4.85408	5.41313	scaffold_2	715880	717335	-
1050042	0.37374	0.788778	2.3435	4.85408	5.41313	scaffold_2	717653	718153	+
1050064	-0.474771	0.642431	-0.211088	2.26912	-3.32193	scaffold_2	729650	730669	-
1050767	0.32879	0.748945	0.373874	-3.32193	1.82817	scaffold_2	849205	850046	+
1050859	0.178514	0.894103	-0.304198	2.26912	2.82817	scaffold_2	880826	883360	-
1050919	-1.35938	0.235699	-3.32193	12.8179	11.1066	scaffold_2	891368	891816	+
1050951	0.537883	0.706075	4.50659	4.26912	5.15009	scaffold_2	900958	907465	+
1050955	-0.377844	0.788563	5.7018	5.26912	4.63552	scaffold_2	907952	911318	-
1051026	-1.58013	0.259768	1.14646	4.59105	-3.32193	scaffold_2	927012	928372	-
1051168	0.32879	0.748945	3.98367	-3.32193	1.82817	scaffold_2	976600	978887	+
1051187	0.06	0.06	1.21518	-3.32193	-3.32193	scaffold_2	978883	979733	-
1051235	0.32879	0.748945	2.47541	-3.32193	1.82817	scaffold_2	992378	993853	+
1051328	0.06	0.06	3.11983	-3.32193	-3.32193	scaffold_2	1027290	1028807	+
1051703	0.335819	0.815152	5.66543	4.26912	4.82817	scaffold_2	1101928	1104104	+
1051740	-0.474771	0.642431	0.489352	2.26912	-3.32193	scaffold_2	1110917	1112729	+
1051751	0.06	0.06	3.18979	-3.32193	-3.32193	scaffold_2	1116208	1116881	+
1051949	0.814409	0.57473	4.65	3.26912	4.82817	scaffold_2	1143705	1144644	+
1052041	0.441112	0.72436	6.30855	6.43904	6.99809	scaffold_2	1174288	1175445	+
1052460	0.25854	0.85789	3.07431	3.26912	3.82817	scaffold_2	1250168	1251108	-
1052471	-0.101568	0.935242	-0.403733	2.26912	1.82817	scaffold_2	1247434	1250112	-
1052504	0.06	0.06	-1.21109	-3.32193	-3.32193	scaffold_2	1246524	1247388	-
1053409	-0.101568	0.935242	3.37387	2.26912	1.82817	scaffold_2	1423342	1424217	+
1053433	0.421972	0.771084	5.14866	3.26912	4.15009	scaffold_2	1434443	1436360	-
1053619	-1.37169	0.316947	1.43277	4.26912	-3.32193	scaffold_2	1486035	1491610	+
1053694	-0.720252	0.608938	1.855	3.85408	1.82817	scaffold_2	1511469	1512780	+
1053770	0.162249	0.911088	3.88167	3.85408	4.15009	scaffold_2	1524666	1526024	+
1053914	0.06	0.06	3.73728	-3.32193	-3.32193	scaffold_2	1546071	1547618	+
1053915	0.06	0.06	1.40362	-3.32193	-3.32193	scaffold_2	1547619	1548448	-
1053924	0.178514	0.894103	2.73143	2.26912	2.82817	scaffold_2	1548448	1549951	-
1054158	0.63309	0.577421	2.3435	-3.32193	2.82817	scaffold_2	1607190	1608854	-
1054270	-0.720252	0.608938	3.7547	3.85408	1.82817	scaffold_2	1647663	1649122	-
1054324	0.261004	0.854326	4.90526	4.59105	4.99809	scaffold_2	1657986	1659927	-
1054431	-0.828781	0.496118	3.12876	3.26912	-3.32193	scaffold_2	1682024	1683819	-
1054542	0.63309	0.577421	1.14646	-3.32193	2.82817	scaffold_2	1704919	1706089	+
1054587	1.08435	0.4107	3.76619	-3.32193	3.82817	scaffold_2	1712211	1715798	+
1054673	0.178514	0.894103	4.44712	2.26912	2.82817	scaffold_2	1729557	1731154	+
1054678	-0.444473	0.743451	3.42554	3.26912	1.82817	scaffold_2	1733221	1735866	+
1054916	0.32879	0.748945	4.25652	-3.32193	1.82817	scaffold_2	1782782	1786293	-
1055088	0.06	0.06	0.543799	-3.32193	-3.32193	scaffold_2	1832787	1834673	-
1055581	0.06	0.06	-4.21109	-3.32193	-3.32193	scaffold_2	1978604	1979255	-
1055601	0.220597	0.878369	5.37763	4.26912	4.63552	scaffold_2	1984047	1985998	+
1055653	-0.403424	0.781224	2.7547	4.26912	3.41313	scaffold_2	2001521	2003665	+
1056034	0.63309	0.577421	2.60909	-3.32193	2.82817	scaffold_2	2059265	2059922	+
1056116	0.32879	0.748945	4.82233	-3.32193	1.82817	scaffold_2	2081992	2083168	-
1056466	0.06	0.06	3.37387	-3.32193	-3.32193	scaffold_2	2148270	2149310	+
1056488	0.32879	0.748945	0.876375	-3.32193	1.82817	scaffold_2	2153201	2153653	-
1056592	0.06	0.06	-0.0411632	-3.32193	-3.32193	scaffold_2	2195215	2198989	-
1056606	-0.720252	0.608938	3.71965	3.85408	1.82817	scaffold_2	2200273	2203164	-
1056667	0.405441	0.770526	3.97874	2.26912	3.41313	scaffold_2	2208338	2211094	+
1057018	7.49854e-08	1	1.59627	3.85408	3.82817	scaffold_2	2272262	2273745	-
1057049	0.549092	0.70394	5.39254	3.85408	4.82817	scaffold_2	2267621	2271277	+
1057077	-0.101568	0.935242	2.87637	2.26912	1.82817	scaffold_2	2277175	2279376	+
1057157	0.220597	0.878369	4.5637	4.26912	4.63552	scaffold_2	2291371	2293582	+
1057164	0.405441	0.770526	2.3435	2.26912	3.41313	scaffold_2	2289457	2291373	-
1057414	-0.474771	0.642431	4.52362	2.26912	-3.32193	scaffold_2	2344093	2345145	+
1057578	0.261004	0.854326	3.08353	4.59105	4.99809	scaffold_2	2362864	2364320	+
1057716	-0.828781	0.496118	3.5371	3.26912	-3.32193	scaffold_2	2389414	2391138	+
1057724	0.06	0.06	1.37387	-3.32193	-3.32193	scaffold_2	2391139	2392453	-
1057859	0.162249	0.911088	5.59788	3.85408	4.15009	scaffold_2	2404228	2405410	-
1058372	-0.474771	0.642431	3.39624	2.26912	-3.32193	scaffold_2	2473940	2476737	+
1058419	-0.418177	0.770736	3.94373	3.85408	2.82817	scaffold_2	2482605	2484408	-
1058627	0.549092	0.70394	2.21518	3.85408	4.82817	scaffold_2	2524914	2526113	+
1058708	-0.526534	0.712963	3.91819	5.07647	4.15009	scaffold_2	2560743	2564890	+
1058734	-0.444473	0.743451	2.70778	3.26912	1.82817	scaffold_2	2564891	2566704	-
1058810	0.06	0.06	1.28076	-3.32193	-3.32193	scaffold_2	2584396	2585661	+
1058969	-0.526534	0.712963	7.99776	5.07647	4.15009	scaffold_2	2610642	2611281	+
1059058	-0.950538	0.506991	3.6958	4.26912	1.82817	scaffold_2	2625891	2627517	-
1059179	-0.950538	0.506991	1.89744	4.26912	1.82817	scaffold_2	2658786	2659815	-
1059624	-0.444473	0.743451	1.99837	3.26912	1.82817	scaffold_2	2722313	2723908	+
1059760	0.875562	0.48389	2.11084	-3.32193	3.41313	scaffold_2	2745376	2746318	+
1059763	0.06	0.06	0.876375	-3.32193	-3.32193	scaffold_2	2744669	2745557	+
1059806	0.178514	0.894103	4.00323	2.26912	2.82817	scaffold_2	2758611	2760553	+
1060210	-0.828781	0.496118	0.743108	3.26912	-3.32193	scaffold_2	2841475	2843254	+
1060669	0.405441	0.770526	2.3435	2.26912	3.41313	scaffold_2	2926564	2927820	+
1061019	-0.444473	0.743451	3.91819	3.26912	1.82817	scaffold_2	2965444	2967027	+
1061034	-0.720252	0.608938	3.6344	3.85408	1.82817	scaffold_2	2970066	2972536	+
1061171	0.178514	0.894103	1.87637	2.26912	2.82817	scaffold_2	2996566	2997519	-
1061613	0.06	0.06	1.6218	-3.32193	-3.32193	scaffold_2	3111620	3113510	-
1061726	-0.720252	0.608938	2.1983	3.85408	1.82817	scaffold_2	3152980	3154013	+
1061727	-0.212381	0.88376	3.28076	4.26912	3.82817	scaffold_2	3154015	3155457	+
1062027	0.06	0.06	-1.62613	-3.32193	-3.32193	scaffold_2	3220910	3222530	-
1062242	0.06	0.06	-0.751657	-3.32193	-3.32193	scaffold_2	3273135	3274293	-
1062245	-0.991645	0.494891	-4.21109	4.85408	2.82817	scaffold_2	3276398	3277062	+
1062258	0.06	0.06	1.07431	-3.32193	-3.32193	scaffold_2	3277220	3278809	-
1062442	0.32879	0.748945	3.58333	-3.32193	1.82817	scaffold_2	3331330	3332690	+
1062593	0.566673	0.696489	2.01773	3.26912	4.41313	scaffold_2	3348973	3349653	-
1062616	-0.444473	0.743451	2.60909	3.26912	1.82817	scaffold_2	3354601	3355602	+
1062984	-0.444473	0.743451	4.00808	3.26912	1.82817	scaffold_2	3426170	3428054	+
1063137	-0.101568	0.935242	3.81128	2.26912	1.82817	scaffold_2	3463959	3464864	+
1063182	0.752684	0.600339	5.20465	3.85408	5.15009	scaffold_2	3468317	3469829	-
1063501	-0.101568	0.935242	1.6958	2.26912	1.82817	scaffold_2	3552503	3553780	-
1063548	0.06	0.06	-2.62613	-3.32193	-3.32193	scaffold_2	3559426	3560328	-
1063613	0.32879	0.748945	1.28076	-3.32193	1.82817	scaffold_2	3567314	3568531	+
1063782	0.178514	0.894103	4.50316	2.26912	2.82817	scaffold_2	3585955	3588088	+
1063902	0.566673	0.696489	4.68978	3.26912	4.41313	scaffold_2	3606768	3610149	+
1063947	-0.891251	0.537503	4.01291	5.07647	3.41313	scaffold_2	3624224	3625154	+
1063951	0.06	0.06	-0.88916	-3.32193	-3.32193	scaffold_2	3625441	3625888	-
1064133	1.08862	0.408936	5.9259	5.26912	6.78236	scaffold_2	3654054	3655835	+
1064229	0.06	0.06	-0.88916	-3.32193	-3.32193	scaffold_2	3672271	3672988	+
1064282	-0.15499	0.912222	4.4578	3.26912	2.82817	scaffold_2	3682246	3684529	+
1064360	0.453772	0.692251	6.55046	8.26912	8.80545	scaffold_2	3701593	3702760	-
1064440	-0.15499	0.912222	5.32419	3.26912	2.82817	scaffold_2	3718104	3718911	-
1064462	1.08435	0.4107	4.33581	-3.32193	3.82817	scaffold_2	3714384	3715292	-
1064571	-0.474771	0.642431	-0.0411632	2.26912	-3.32193	scaffold_2	3724333	3725995	+
1064752	0.06	0.06	-3.21109	-3.32193	-3.32193	scaffold_2	3779796	3780630	-
1065114	0.06	0.06	-2.62613	-3.32193	-3.32193	scaffold_2	3855877	3856941	+
1065220	-0.524057	0.634317	0.432768	11.6333	10.9728	scaffold_2	3879110	3880287	-
1065528	0.178514	0.894103	3.72555	2.26912	2.82817	scaffold_2	3941259	3942845	+
1065563	0.06	0.06	-2.21109	-3.32193	-3.32193	scaffold_2	3953260	3954136	+
1065793	0.022494	0.986601	6.38603	5.72855	5.73506	scaffold_2	3993535	3995913	+
1066273	-0.473885	0.713434	5.7547	6.59105	5.91563	scaffold_2	4067113	4078124	-
1066526	0.0701075	0.96092	4.14646	3.26912	3.41313	scaffold_2	4110351	4111409	-
1066579	-0.15499	0.912222	3.58981	3.26912	2.82817	scaffold_2	4124112	4126383	-
1066721	0.06	0.06	-0.403733	-3.32193	-3.32193	scaffold_2	4156638	4157535	-
1067108	0.32879	0.748945	-2.62613	-3.32193	1.82817	scaffold_2	4243139	4243980	-
1067484	0.875562	0.48389	-1.62613	-3.32193	3.41313	scaffold_2	4277844	4279371	-
1067502	0.06	0.06	-1.04116	-3.32193	-3.32193	scaffold_2	4279800	4280937	+
1067519	0.06	0.06	0.181229	-3.32193	-3.32193	scaffold_2	4282729	4283334	+
1067567	0.162249	0.911088	3.15523	3.85408	4.15009	scaffold_2	4296391	4298447	-
1067610	0.06	0.06	3.1983	-3.32193	-3.32193	scaffold_2	4299884	4301723	+
1067622	-0.243014	0.865201	5.71965	4.85408	4.41313	scaffold_2	4301556	4307340	+
1067743	0.06	0.06	-1.04116	-3.32193	-3.32193	scaffold_2	4323509	4324496	-
1067810	0.875562	0.48389	2.71965	-3.32193	3.41313	scaffold_2	4340425	4343225	+
1067841	-0.101568	0.935242	2.59627	2.26912	1.82817	scaffold_2	4339005	4340424	+
1068285	0.32879	0.748945	1.03684	-3.32193	1.82817	scaffold_2	4447694	4448695	-
1068535	-0.474771	0.642431	4.83604	2.26912	-3.32193	scaffold_2	4503712	4507182	+
1068867	1.05179	0.468034	2.16395	2.26912	4.63552	scaffold_2	4573585	4576168	+
1068873	0.598909	0.672767	3.51683	2.26912	3.82817	scaffold_2	4583701	4584714	-
1068941	-0.253561	0.857955	5.66236	5.07647	4.63552	scaffold_2	4590363	4595759	+
1069097	0.875562	0.48389	3.51001	-3.32193	3.41313	scaffold_2	4635526	4636992	-
1069437	0.32879	0.748945	4.46487	-3.32193	1.82817	scaffold_2	4728006	4729726	+
1069819	0.06	0.06	0.373874	-3.32193	-3.32193	scaffold_2	4805872	4806874	-
1069821	0.178514	0.894103	3.74311	2.26912	2.82817	scaffold_2	4806573	4807538	-
1069942	0.63309	0.577421	3.27273	-3.32193	2.82817	scaffold_2	4822051	4824145	-
1070112	0.06	0.06	-3.32193	-3.32193	-3.32193	scaffold_2	4849937	4850419	+
1070309	-0.309729	0.786382	8.55875	8.74485	8.33596	scaffold_20	9322	12751	-
1070383	2.08454	0.084055	0.432768	9.38806	12.0485	scaffold_3	351	1507	-
1070393	0.178514	0.894103	2.58333	2.26912	2.82817	scaffold_3	6958	9392	+
1070487	-0.0495273	0.972754	4.33194	4.26912	4.15009	scaffold_3	34679	36948	-
1070526	-0.444473	0.743451	2.1983	3.26912	1.82817	scaffold_3	40202	41568	+
1070530	-0.444473	0.743451	-1.40373	3.26912	1.82817	scaffold_3	39062	39816	+
1070664	0.178514	0.894103	3.81128	2.26912	2.82817	scaffold_3	61629	64100	-
1070714	0.421972	0.771084	3.36634	3.26912	4.15009	scaffold_3	63805	65743	-
1070823	1.08435	0.4107	3.3435	-3.32193	3.82817	scaffold_3	84122	85567	-
1070840	0.32879	0.748945	3.07431	-3.32193	1.82817	scaffold_3	82001	83543	+
1070857	-0.185321	0.881954	3.30461	6.85408	6.58305	scaffold_3	87296	88583	-
1070957	-0.474771	0.642431	4.59627	2.26912	-3.32193	scaffold_3	107153	109174	-
1070992	0.06	0.06	-0.510648	-3.32193	-3.32193	scaffold_3	112242	112999	-
1071000	0.06	0.06	-1.04116	-3.32193	-3.32193	scaffold_3	113777	114754	-
1071073	0.566673	0.696489	3.60909	3.26912	4.41313	scaffold_3	127323	129971	-
1071074	-0.15499	0.912222	2.09269	3.26912	2.82817	scaffold_3	126809	127321	-
1071129	-0.245006	0.822349	-0.304198	12.0456	11.7245	scaffold_3	141453	142529	+
1071138	-0.474771	0.642431	-1.62613	2.26912	-3.32193	scaffold_3	147281	148282	+
1071434	-0.18886	0.896173	3.97874	3.85408	3.41313	scaffold_3	191770	195969	+
1071664	-0.101568	0.935242	1.03684	2.26912	1.82817	scaffold_3	243187	244208	+
1071760	0.25854	0.85789	2.87637	3.26912	3.82817	scaffold_3	261304	262439	-
1071809	0.549092	0.70394	5.18337	3.85408	4.82817	scaffold_3	277843	280833	+
1072369	0.696556	0.631624	1.6958	3.26912	4.63552	scaffold_3	367252	369239	-
1072452	0.405441	0.770526	3.46134	2.26912	3.41313	scaffold_3	391366	392628	+
1072663	0.405441	0.770526	3.01773	2.26912	3.41313	scaffold_3	451429	454592	-
1072679	0.06	0.06	2.32807	-3.32193	-3.32193	scaffold_3	450308	451429	+
1073204	0.178514	0.894103	2.12876	2.26912	2.82817	scaffold_3	572659	573762	-
1073517	0.06	0.06	-2.62613	-3.32193	-3.32193	scaffold_3	614703	615288	-
1073615	0.219369	0.871269	7.66504	5.43904	5.73506	scaffold_3	636203	642690	+
1073618	0.63309	0.577421	-2.21109	-3.32193	2.82817	scaffold_3	642559	644862	-
1073662	1.42614	0.304548	3.35115	-3.32193	4.41313	scaffold_3	650290	651835	+
1073722	1.17314	0.419138	5.93739	2.26912	4.82817	scaffold_3	681965	684636	-
1073769	0.32879	0.748945	3.39624	-3.32193	1.82817	scaffold_3	692376	693343	+
1073884	-0.374648	0.788145	5.48414	5.43904	4.82817	scaffold_3	719215	725201	-
1073894	-0.101568	0.935242	2.86573	2.26912	1.82817	scaffold_3	726504	727883	-
1073899	0.63309	0.577421	-1.88916	-3.32193	2.82817	scaffold_3	728517	729535	+
1074016	0.06	0.06	2.6958	-3.32193	-3.32193	scaffold_3	751121	753069	+
1074121	0.598909	0.672767	5.89482	2.26912	3.82817	scaffold_3	788193	789922	-
1074332	0.06	0.06	2.35877	-3.32193	-3.32193	scaffold_3	836391	837622	+
1074344	-0.444473	0.743451	2.01773	3.26912	1.82817	scaffold_3	833363	835260	+
1074438	-0.444473	0.743451	3.4824	3.26912	1.82817	scaffold_3	859753	861445	-
1074484	-0.403424	0.781224	4.09725	4.26912	3.41313	scaffold_3	867850	868783	-
1074533	0.32879	0.748945	3.68978	-3.32193	1.82817	scaffold_3	880344	882367	+
1074552	0.06	0.06	1.21518	-3.32193	-3.32193	scaffold_3	883333	884830	+
1074875	-1.31823	0.36351	2.03684	4.85408	1.82817	scaffold_3	962751	964439	-
1074883	-0.991645	0.494891	1.89744	4.85408	2.82817	scaffold_3	967143	968827	+
1074913	-0.720252	0.608938	2.70778	3.85408	1.82817	scaffold_3	972160	975690	+
1074929	0.32879	0.748945	5.57027	-3.32193	1.82817	scaffold_3	978345	979748	-
1075203	-0.828781	0.496118	3.24834	3.26912	-3.32193	scaffold_3	1040499	1041290	-
1075345	0.433145	0.764932	3.82233	3.85408	4.63552	scaffold_3	1076083	1076828	-
1075381	0.283288	0.816478	7.47672	6.91297	7.25443	scaffold_3	1080817	1082124	-
1075563	-0.285765	0.814958	6.41553	7.26912	6.87256	scaffold_3	1137825	1139517	-
1075631	0.32879	0.748945	2.96882	-3.32193	1.82817	scaffold_3	1157906	1159626	-
1075745	0.32879	0.748945	3.78891	-3.32193	1.82817	scaffold_3	1173592	1175119	+
1075765	0.405441	0.770526	4.95633	2.26912	3.41313	scaffold_3	1180032	1181462	-
1075782	0.566673	0.696489	3.07431	3.26912	4.41313	scaffold_3	1187628	1190255	-
1075853	0.178514	0.894103	4.85769	2.26912	2.82817	scaffold_3	1200636	1205265	+
1075903	-0.101568	0.935242	-1.21109	2.26912	1.82817	scaffold_3	1205148	1205712	+
1076137	0.06	0.06	0.788912	-3.32193	-3.32193	scaffold_3	1246773	1248741	-
1076231	0.32879	0.748945	0.998365	-3.32193	1.82817	scaffold_3	1279342	1280685	-
1076302	0.598909	0.672767	5.24218	2.26912	3.82817	scaffold_3	1287355	1288645	+
1076429	-0.826751	0.569208	3.90265	4.59105	2.82817	scaffold_3	1289790	1290603	+
1076447	-0.418177	0.770736	5.51001	3.85408	2.82817	scaffold_3	1292680	1295138	-
1076668	-0.101568	0.935242	2.32807	2.26912	1.82817	scaffold_3	1323502	1324699	-
1076688	-0.490632	0.726312	5.99837	5.43904	4.63552	scaffold_3	1324701	1327238	-
1076865	-0.474771	0.642431	-0.88916	2.26912	-3.32193	scaffold_3	1333493	1334418	-
1077110	0.0931958	0.948616	4.13321	4.26912	4.41313	scaffold_3	1406523	1407664	+
1077244	-0.18886	0.896173	2.74311	3.85408	3.41313	scaffold_3	1424357	1427425	-
1077285	1.02097	0.480264	4.65619	3.26912	5.15009	scaffold_3	1434598	1436951	-
1077345	0.06	0.06	2.01773	-3.32193	-3.32193	scaffold_3	1448146	1450797	+
1077722	0.162249	0.911088	4.1596	3.85408	4.15009	scaffold_3	1531899	1532807	+
1078147	-0.101568	0.935242	2.78891	2.26912	1.82817	scaffold_3	1614584	1615398	-
1078228	0.305167	0.833475	4.39254	3.85408	4.41313	scaffold_3	1622923	1625715	+
1078464	0.688137	0.561659	5.87106	7.35658	8.20321	scaffold_3	1666985	1668127	-
1078549	0.06	0.06	0.312474	-3.32193	-3.32193	scaffold_3	1676623	1677033	+
1078648	0.32879	0.748945	2.71965	-3.32193	1.82817	scaffold_3	1704028	1705181	-
1078651	-0.15499	0.912222	3.18979	3.26912	2.82817	scaffold_3	1705157	1707074	-
1078996	0.06	0.06	0.695802	-3.32193	-3.32193	scaffold_3	1766362	1767671	-
1079195	0.06	0.06	-1.04116	-3.32193	-3.32193	scaffold_3	1803278	1804572	-
1079294	0.06	0.06	3.30461	-3.32193	-3.32193	scaffold_3	1822055	1823631	+
1079305	-0.637949	0.659471	1.21518	4.26912	2.82817	scaffold_3	1826232	1826637	+
1079561	7.36848e-08	1	5.14206	4.85408	4.82817	scaffold_3	1880058	1882848	-
1079564	0.178514	0.894103	1.28076	2.26912	2.82817	scaffold_3	1878538	1880058	+
1079712	0.405441	0.770526	3.06504	2.26912	3.41313	scaffold_3	1903172	1904784	-
1079753	0.0701075	0.96092	2.59627	3.26912	3.41313	scaffold_3	1908856	1909832	+
1079880	0.229685	0.861207	6.6043	5.85408	6.15009	scaffold_3	1936492	1940210	+
1079916	0.303946	0.795659	1.24834	7.66144	8.01799	scaffold_3	1943841	1946111	+
1079956	1.02097	0.480264	5.03921	3.26912	5.15009	scaffold_3	1952764	1956799	-
1080090	0.320672	0.771557	9.07922	10.1271	10.4899	scaffold_3	1979343	1982793	-
1080372	0.63309	0.577421	1.67155	-3.32193	2.82817	scaffold_3	2046833	2049310	-
1080615	0.305167	0.833475	4.94626	3.85408	4.41313	scaffold_3	2089408	2091278	-
1080634	-0.474771	0.642431	1.31247	2.26912	-3.32193	scaffold_3	2091201	2093059	-
1081001	-0.587356	0.685939	4.57027	4.59105	3.41313	scaffold_3	2130270	2134011	-
1081029	-0.381831	0.788578	5.09497	5.07647	4.41313	scaffold_3	2144780	2149028	+
1081209	0.63309	0.577421	6.23393	-3.32193	2.82817	scaffold_3	2197746	2200496	-
1081341	0.06	0.06	1.43277	-3.32193	-3.32193	scaffold_3	2240200	2241553	-
1081343	0.06	0.06	5.75181	-3.32193	-3.32193	scaffold_3	2238369	2239580	-
1081352	0.06	0.06	1.3435	-3.32193	-3.32193	scaffold_3	2239385	2240755	+
1081453	0.405441	0.770526	3.07431	2.26912	3.41313	scaffold_3	2247599	2248980	+
1081605	-0.364998	0.784128	6.43727	6.07647	5.52861	scaffold_3	2272194	2275530	+
1081788	0.421972	0.771084	4.95633	3.26912	4.15009	scaffold_3	2316107	2316967	-
1081805	-1.97997	0.163255	5.34158	6.26912	2.82817	scaffold_3	2310924	2313976	+
1081998	0.875562	0.48389	1.71965	-3.32193	3.41313	scaffold_3	2354526	2355665	-
1082198	0.246856	0.835618	5.98367	7.3984	7.68615	scaffold_3	2401740	2404601	-
1082305	-0.0367097	0.975828	7.74565	7.22331	7.15009	scaffold_3	2430882	2438490	-
1082674	-0.587356	0.685939	6.05335	4.59105	3.41313	scaffold_3	2510122	2511427	+
1082826	1.08435	0.4107	3.28876	-3.32193	3.82817	scaffold_3	2537872	2538970	+
1082899	0.06	0.06	4.4824	-3.32193	-3.32193	scaffold_3	2533892	2535037	-
1082906	-0.386952	0.787877	5.33966	4.85408	4.15009	scaffold_3	2530006	2532921	-
1082921	-0.101568	0.935242	4.35497	2.26912	1.82817	scaffold_3	2536156	2537870	-
1082935	1.08435	0.4107	3.35877	-3.32193	3.82817	scaffold_3	2538333	2539566	-
1083001	0.566673	0.696489	5.0105	3.26912	4.41313	scaffold_3	2547957	2549390	-
1083107	-0.828781	0.496118	4.55378	3.26912	-3.32193	scaffold_3	2581258	2583294	+
1083164	-0.587356	0.685939	0.876375	4.59105	3.41313	scaffold_3	2592450	2593470	-
1083252	-0.891251	0.537503	4.83876	5.07647	3.41313	scaffold_3	2608601	2610993	-
1083378	-0.474771	0.642431	0.743108	2.26912	-3.32193	scaffold_3	2650214	2652020	-
1083493	0.022494	0.986601	5.83331	5.72855	5.73506	scaffold_3	2663139	2667986	+
1083662	0.63309	0.577421	2.16395	-3.32193	2.82817	scaffold_3	2713438	2715195	+
1083676	-0.444473	0.743451	4.5371	3.26912	1.82817	scaffold_3	2717258	2719814	-
1083779	0.32879	0.748945	1.03684	-3.32193	1.82817	scaffold_3	2731198	2732787	+
1083836	0.178514	0.894103	3.0463	2.26912	2.82817	scaffold_3	2747904	2748396	-
1084154	0.0701075	0.96092	4.62812	3.26912	3.41313	scaffold_3	2815863	2817607	+
1084426	0.06	0.06	2.38882	-3.32193	-3.32193	scaffold_3	2878169	2880910	+
1084526	0.875562	0.48389	2.57027	-3.32193	3.41313	scaffold_3	2906611	2908475	+
1084528	0.06	0.06	0.596267	-3.32193	-3.32193	scaffold_3	2909426	2912527	+
1084597	0.0701075	0.96092	5.21727	3.26912	3.41313	scaffold_3	2922704	2924567	-
1084808	0.0931958	0.948616	6.37199	4.26912	4.41313	scaffold_3	2978496	2980774	-
1084814	0.06	0.06	-3.32193	-3.32193	-3.32193	scaffold_3	2980971	2981475	-
1085171	0.329751	0.800899	7.5813	5.85408	6.2876	scaffold_3	3071108	3072285	-
1085506	-0.0495273	0.972754	4.51001	4.26912	4.15009	scaffold_3	3119558	3122012	-
1085526	-0.474771	0.642431	0.11084	2.26912	-3.32193	scaffold_3	3124753	3125434	-
1085613	0.32879	0.748945	2.73143	-3.32193	1.82817	scaffold_3	3142253	3143944	-
1085788	-0.18886	0.896173	2.74311	3.85408	3.41313	scaffold_3	3185372	3186457	-
1085796	-0.418177	0.770736	4.83057	3.85408	2.82817	scaffold_3	3186975	3189678	+
1087020	-0.15499	0.912222	4.2277	3.26912	2.82817	scaffold_3	3405155	3407949	-
1087085	0.63309	0.577421	2.95884	-3.32193	2.82817	scaffold_3	3411919	3413504	+
1087268	-0.474771	0.642431	3.6958	2.26912	-3.32193	scaffold_3	3450653	3453024	+
1087314	0.06	0.06	0.432768	-3.32193	-3.32193	scaffold_3	3453646	3454437	-
1087363	0.06	0.06	4.3435	-3.32193	-3.32193	scaffold_3	3459774	3462051	+
1087790	-0.418177	0.770736	4.28876	3.85408	2.82817	scaffold_3	3549217	3550987	-
1087980	0.06	0.06	2.68373	-3.32193	-3.32193	scaffold_3	3577656	3578830	+
1088000	0.489296	0.667097	6.62969	8.55452	9.13195	scaffold_3	3583487	3585099	-
1088070	-0.637949	0.659471	4.67461	4.26912	2.82817	scaffold_3	3589437	3590053	+
1088130	-0.101568	0.935242	5.08812	2.26912	1.82817	scaffold_3	3604576	3605975	+
1088173	-0.828781	0.496118	4.32029	3.26912	-3.32193	scaffold_3	3612336	3614125	+
1088230	-0.386952	0.787877	4.94626	4.85408	4.15009	scaffold_3	3626319	3628935	+
1088317	0.06	0.06	-3.21109	-3.32193	-3.32193	scaffold_3	3655365	3656643	-
1088389	0.752684	0.600339	6.19512	3.85408	5.15009	scaffold_3	3668918	3672872	+
1088433	-1.48253	0.199571	0.11084	12.7976	10.9236	scaffold_3	3675931	3677262	-
1088434	-1.59532	0.172061	-1.88916	11.9076	9.87801	scaffold_3	3675126	3675932	-
1088508	0.32879	0.748945	3.90265	-3.32193	1.82817	scaffold_3	3690668	3691524	+
1088726	0.32879	0.748945	2.11084	-3.32193	1.82817	scaffold_3	3742549	3743561	+
1088794	-0.101568	0.935242	2.64689	2.26912	1.82817	scaffold_3	3759458	3761389	+
1088813	0.06	0.06	0.695802	-3.32193	-3.32193	scaffold_3	3767816	3768862	+
1088973	0.598909	0.672767	4.63753	2.26912	3.82817	scaffold_3	3844312	3846509	+
1089106	0.06	0.06	-0.304198	-3.32193	-3.32193	scaffold_3	3863890	3865030	+
1089273	0.0701075	0.96092	3.97874	3.26912	3.41313	scaffold_3	3896753	3899583	+
1089341	-1.14736	0.42715	5.35306	4.59105	1.82817	scaffold_3	3907907	3909522	-
1089342	0.32879	0.748945	2.67155	-3.32193	1.82817	scaffold_3	3907214	3907905	-
1089439	0.06	0.06	0.646893	-3.32193	-3.32193	scaffold_3	3914406	3915529	-
1089616	-0.15499	0.912222	1.43277	3.26912	2.82817	scaffold_3	3959426	3960627	-
1089712	-0.101568	0.935242	3.36634	2.26912	1.82817	scaffold_3	3976630	3978053	+
1089714	0.549092	0.70394	5.27071	3.85408	4.82817	scaffold_3	3978512	3979503	-
1089916	0.63309	0.577421	2.74311	-3.32193	2.82817	scaffold_3	4016942	4018715	+
1089944	-0.101568	0.935242	3.36634	2.26912	1.82817	scaffold_3	4020467	4022458	+
1090105	0.06	0.06	1.83331	-3.32193	-3.32193	scaffold_3	4056298	4057214	+
1090312	-0.101568	0.935242	2.44712	2.26912	1.82817	scaffold_3	4082401	4084591	-
1090322	0.63309	0.577421	1.48935	-3.32193	2.82817	scaffold_3	4086035	4087831	+
1090345	0.06	0.06	4.73143	-3.32193	-3.32193	scaffold_3	4088924	4092037	+
1090601	0.680887	0.625727	4.79173	4.59105	5.63552	scaffold_3	4147524	4148547	-
1090920	-1.7591	0.215897	1.46134	4.85408	-3.32193	scaffold_3	4202984	4203931	-
1090980	-0.393788	0.785857	4.2277	4.59105	3.82817	scaffold_3	4210803	4214560	+
1091019	0.32879	0.748945	1.40362	-3.32193	1.82817	scaffold_3	4230191	4231095	+
1091185	0.32879	0.748945	4.42191	-3.32193	1.82817	scaffold_3	4223720	4224707	+
1091204	0.06	0.06	-2.21109	-3.32193	-3.32193	scaffold_3	4248285	4249250	+
1091318	-0.474771	0.642431	1.78891	2.26912	-3.32193	scaffold_3	4269082	4270247	+
1091344	0.748143	0.563856	6.19936	5.72855	6.73506	scaffold_3	4276709	4279466	-
1091539	0.754304	0.523279	6.11197	7.43904	8.36732	scaffold_3	4331085	4337416	+
1091757	-0.444473	0.743451	4.83876	3.26912	1.82817	scaffold_3	4376655	4378181	-
1091950	0.63309	0.577421	2.92846	-3.32193	2.82817	scaffold_3	4423035	4425161	-
1092088	0.32879	0.748945	2.6218	-3.32193	1.82817	scaffold_3	4468434	4471074	-
1092361	0.32879	0.748945	1.76619	-3.32193	1.82817	scaffold_3	4552454	4553108	+
1092364	0.25854	0.85789	2.01773	3.26912	3.82817	scaffold_3	4553086	4554211	-
1092435	0.875562	0.48389	2.35877	-3.32193	3.41313	scaffold_3	4574672	4576246	-
1092496	1.97366	0.130961	4.47541	5.07647	7.82817	scaffold_3	4587915	4588635	+
1092584	0.112108	0.935102	4.46487	5.26912	5.41313	scaffold_3	4603740	4605471	-
1092799	0.25854	0.85789	4.24424	3.26912	3.82817	scaffold_4	20983	22570	+
1092805	0.178514	0.894103	0.918195	2.26912	2.82817	scaffold_4	23128	25117	-
1092906	0.914777	0.477962	4.44712	5.72855	6.95745	scaffold_4	41935	42716	+
1092931	-0.474771	0.642431	2.59627	2.26912	-3.32193	scaffold_4	41253	42008	+
1093149	-0.418177	0.770736	3.855	3.85408	2.82817	scaffold_4	86124	88084	-
1093185	0.06	0.06	3.59627	-3.32193	-3.32193	scaffold_4	94018	95888	-
1093192	-0.101568	0.935242	2.46134	2.26912	1.82817	scaffold_4	95769	97855	+
1093745	-0.7483	0.605723	0.788912	4.85408	3.41313	scaffold_4	193340	195217	+
1093855	-0.101568	0.935242	1.37387	2.26912	1.82817	scaffold_4	210705	211682	+
1094217	-0.101568	0.935242	-0.88916	2.26912	1.82817	scaffold_4	292601	293716	+
1094440	0.06	0.06	-1.21109	-3.32193	-3.32193	scaffold_4	338790	339590	-
1094707	-0.15499	0.912222	2.29671	3.26912	2.82817	scaffold_4	357049	357990	+
1095091	0.63309	0.577421	2.5571	-3.32193	2.82817	scaffold_4	441159	442123	+
1095112	0.32879	0.748945	1.14646	-3.32193	1.82817	scaffold_4	450131	451456	-
1095926	0.32879	0.748945	5.21727	-3.32193	1.82817	scaffold_4	544354	546058	+
1095985	0.06	0.06	0.918195	-3.32193	-3.32193	scaffold_4	556124	557278	+
1096036	-0.474771	0.642431	3.10179	2.26912	-3.32193	scaffold_4	568189	569872	-
1096335	0.32879	0.748945	2.3435	-3.32193	1.82817	scaffold_4	650669	652259	-
1096349	0.405441	0.770526	5.39624	2.26912	3.41313	scaffold_4	657638	661543	+
1096601	0.06	0.06	0.248343	-3.32193	-3.32193	scaffold_4	714425	715281	-
1096673	0.32879	0.748945	2.23186	-3.32193	1.82817	scaffold_4	728898	730514	-
1096749	-0.101568	0.935242	3.49627	2.26912	1.82817	scaffold_4	737191	739630	+
1096977	0.06	0.06	2.5438	-3.32193	-3.32193	scaffold_4	783595	785675	+
1097320	0.178514	0.894103	-2.62613	2.26912	2.82817	scaffold_4	839612	840079	-
1097494	0.25854	0.85789	4.11084	3.26912	3.82817	scaffold_4	854852	856316	-
1097547	-0.474771	0.642431	3.11983	2.26912	-3.32193	scaffold_4	871419	872300	+
1097677	0.220597	0.878369	5.10406	4.26912	4.63552	scaffold_4	883586	887269	+
1097718	0.06	0.06	4.04158	-3.32193	-3.32193	scaffold_4	899759	900359	-
1098023	0.875562	0.48389	3.32807	-3.32193	3.41313	scaffold_4	991390	993928	+
1098158	0.566673	0.696489	3.03684	3.26912	4.41313	scaffold_4	1013708	1014481	+
1098205	0.328915	0.795681	5.5637	6.26912	6.68615	scaffold_4	1024940	1025813	-
1098281	-0.101568	0.935242	2.71965	2.26912	1.82817	scaffold_4	1029385	1031455	+
1098354	0.14739	0.908936	5.55046	6.17601	6.35173	scaffold_4	1054917	1058717	-
1098539	0.178514	0.894103	-1.04116	2.26912	2.82817	scaffold_4	1108137	1109090	+
1098558	-0.101568	0.935242	1.5438	2.26912	1.82817	scaffold_4	1119538	1122112	+
1098923	-0.101568	0.935242	2.71965	2.26912	1.82817	scaffold_4	1185873	1188323	+
1098985	-0.444473	0.743451	2.14646	3.26912	1.82817	scaffold_4	1193574	1195296	-
1099041	-0.444473	0.743451	3.26465	3.26912	1.82817	scaffold_4	1198135	1200141	-
1099325	0.696556	0.631624	4.84961	3.26912	4.63552	scaffold_4	1234746	1239221	+
1099372	0.06	0.06	-1.40373	-3.32193	-3.32193	scaffold_4	1250055	1250960	-
1099419	-0.444473	0.743451	3.71965	3.26912	1.82817	scaffold_4	1276651	1278814	-
1099924	0.453832	0.707953	5.81544	6.96956	7.52861	scaffold_4	1374148	1375470	+
1100085	0.32879	0.748945	2.44712	-3.32193	1.82817	scaffold_4	1426043	1427673	+
1100089	-0.0330454	0.981211	5.17693	5.07647	4.99809	scaffold_4	1423820	1426038	+
1100164	-0.393788	0.785857	5.4824	4.59105	3.82817	scaffold_4	1438823	1442180	+
1100238	-0.185744	0.891936	6.85836	5.59105	5.2876	scaffold_4	1442534	1447298	+
1100370	0.696556	0.631624	5.30264	3.26912	4.63552	scaffold_4	1504868	1505861	-
1100378	0.598909	0.672767	3.87637	2.26912	3.82817	scaffold_4	1503186	1504867	+
1100546	-0.101568	0.935242	2.01773	2.26912	1.82817	scaffold_4	1530310	1533029	+
1100667	0.174393	0.875598	-0.88916	9.44903	9.63552	scaffold_4	1558913	1559753	-
1100676	-1.40293	0.242048	2.70778	9.07647	7.25443	scaffold_4	1560925	1561532	-
1100753	-0.950538	0.506991	4.57355	4.26912	1.82817	scaffold_4	1574776	1578498	-
1101027	0.32879	0.748945	4.64689	-3.32193	1.82817	scaffold_4	1617615	1619304	+
1101212	-1.37169	0.316947	4.50316	4.26912	-3.32193	scaffold_4	1684365	1685973	-
1101397	-0.474771	0.642431	2.31247	2.26912	-3.32193	scaffold_4	1721983	1722905	+
1101557	0.178514	0.894103	2.09269	2.26912	2.82817	scaffold_4	1760766	1762133	-
1101674	0.0701075	0.96092	4.20676	3.26912	3.41313	scaffold_4	1784436	1786087	-
1101752	0.176287	0.893525	7.62141	5.85408	6.07609	scaffold_4	1814760	1815848	-
1101848	0.63309	0.577421	1.71965	-3.32193	2.82817	scaffold_4	1828852	1829652	-
1101877	-0.828781	0.496118	0.489352	3.26912	-3.32193	scaffold_4	1829801	1831166	+
1101912	-0.418177	0.770736	2.16395	3.85408	2.82817	scaffold_4	1852757	1856169	+
1101914	0.63309	0.577421	-0.403733	-3.32193	2.82817	scaffold_4	1852301	1852809	+
1101928	-0.637949	0.659471	5.47891	4.26912	2.82817	scaffold_4	1863089	1867221	+
1101989	-0.444473	0.743451	1.21518	3.26912	1.82817	scaffold_4	1876963	1877933	-
1102055	-0.950538	0.506991	4.03209	4.26912	1.82817	scaffold_4	1885537	1887261	-
1102056	1.08435	0.4107	2.11084	-3.32193	3.82817	scaffold_4	1887263	1888946	-
1102147	-0.15499	0.912222	2.37387	3.26912	2.82817	scaffold_4	1904193	1905484	-
1102408	0.178514	0.894103	4.27675	2.26912	2.82817	scaffold_4	1964122	1966264	-
1102424	0.178514	0.894103	4.34733	2.26912	2.82817	scaffold_4	1966977	1968356	+
1102661	7.49854e-08	1	3.71372	3.85408	3.82817	scaffold_4	2042210	2043751	-
1102710	-0.720252	0.608938	4.18979	3.85408	1.82817	scaffold_4	2038688	2042447	+
1102733	0.178514	0.894103	2.31247	2.26912	2.82817	scaffold_4	2047649	2049701	+
1102734	0.06	0.06	-0.304198	-3.32193	-3.32193	scaffold_4	2049702	2051087	+
1103215	-0.288569	0.829181	4.27675	5.96956	5.52861	scaffold_4	2115891	2116408	-
1103333	-0.101568	0.935242	-0.403733	2.26912	1.82817	scaffold_4	2130776	2131963	+
1103531	0.767871	0.592441	3.37387	2.26912	4.15009	scaffold_4	2179209	2182255	-
1103689	0.178514	0.894103	3.86573	2.26912	2.82817	scaffold_4	2211904	2215337	+
1103738	0.451407	0.745374	4.7226	4.85408	5.52861	scaffold_4	2215804	2217966	+
1103841	1.35676	0.317336	7.43051	4.59105	6.58305	scaffold_4	2231669	2235178	+
1104085	0.25854	0.85789	3.4824	3.26912	3.82817	scaffold_4	2289075	2291178	+
1104116	0.32879	0.748945	-1.21109	-3.32193	1.82817	scaffold_4	2302806	2304655	+
1104164	0.32879	0.748945	0.312474	-3.32193	1.82817	scaffold_4	2332820	2334112	+
1104539	0.25854	0.85789	6.06968	3.26912	3.82817	scaffold_4	2424786	2426573	+
1104623	-0.15499	0.912222	3.13764	3.26912	2.82817	scaffold_4	2429439	2431491	-
1104704	-0.474771	0.642431	-2.21109	2.26912	-3.32193	scaffold_4	2452030	2452824	+
1104863	0.06	0.06	-3.32193	-3.32193	-3.32193	scaffold_4	2479894	2480294	+
1105051	-0.474771	0.642431	0.743108	2.26912	-3.32193	scaffold_4	2537863	2539851	-
1105191	-0.828781	0.496118	3.59627	3.26912	-3.32193	scaffold_4	2565706	2566846	-
1105240	0.0931958	0.948616	5.93484	4.26912	4.41313	scaffold_4	2580960	2585148	-
1105307	-0.101568	0.935242	3.06504	2.26912	1.82817	scaffold_4	2585331	2586826	-
1105765	1.69583	0.232997	5.94246	-3.32193	4.82817	scaffold_4	2708339	2709663	+
1105776	-0.0864974	0.952073	4.25244	4.59105	4.41313	scaffold_4	2709665	2710484	-
1106183	-1.91473	0.181708	3.94373	5.07647	-3.32193	scaffold_4	2804466	2808507	-
1106425	1.21352	0.390433	3.00808	3.85408	5.82817	scaffold_4	2884908	2885431	+
1106426	0.0751601	0.95204	7.23806	6.66144	6.73506	scaffold_4	2883266	2884907	-
1106966	0.06	0.06	0.312474	-3.32193	-3.32193	scaffold_4	2960366	2961632	+
1107156	0.767871	0.592441	3.79454	2.26912	4.15009	scaffold_4	3019011	3021995	+
1107276	-0.828781	0.496118	-2.21109	3.26912	-3.32193	scaffold_4	3033827	3035594	-
1107378	0.06	0.06	1.28076	-3.32193	-3.32193	scaffold_4	3060265	3061221	+
1108332	-0.444473	0.743451	1.46134	3.26912	1.82817	scaffold_4	3218155	3219594	-
1108802	-0.826751	0.569208	5.59466	4.59105	2.82817	scaffold_4	3294780	3295893	-
1109047	-0.101568	0.935242	5.8469	2.26912	1.82817	scaffold_4	3344135	3345204	-
1109081	0.261004	0.854326	5.22978	4.59105	4.99809	scaffold_4	3350324	3354566	-
1109428	1.35077	0.346101	5.23806	3.26912	5.63552	scaffold_4	3419722	3424001	-
1109927	0.767871	0.592441	4.80572	2.26912	4.15009	scaffold_4	3523449	3525680	+
1110046	-0.101568	0.935242	0.743108	2.26912	1.82817	scaffold_4	3540094	3541367	+
1110054	0.63309	0.577421	-0.304198	-3.32193	2.82817	scaffold_4	3539157	3540240	+
1110116	-0.101568	0.935242	4.05101	2.26912	1.82817	scaffold_4	3569857	3572004	-
1110126	-0.403424	0.781224	6.0105	4.26912	3.41313	scaffold_4	3567085	3569856	+
1110172	-0.15499	0.912222	3.43996	3.26912	2.82817	scaffold_4	3585076	3586588	+
1110402	0.130059	0.915884	5.32029	6.85408	6.99809	scaffold_4	3628979	3630326	+
1110911	-0.474771	0.642431	0.248343	2.26912	-3.32193	scaffold_4	3740772	3742613	+
1111113	0.201417	0.886099	2.96882	4.85408	5.15009	scaffold_4	3779663	3781820	+
1111404	-0.418177	0.770736	1.11084	3.85408	2.82817	scaffold_4	3841336	3843703	+
1111405	0.63309	0.577421	-1.04116	-3.32193	2.82817	scaffold_4	3843705	3844224	+
1111732	-0.637949	0.659471	4.05101	4.26912	2.82817	scaffold_4	3916195	3918234	+
1112454	0.32879	0.748945	1.6218	-3.32193	1.82817	scaffold_4	4008166	4009764	+
1113179	7.49854e-08	1	6.30165	3.85408	3.82817	scaffold_4	4163234	4167437	+
1113280	0.0701075	0.96092	3.64066	3.26912	3.41313	scaffold_4	4191493	4193244	+
1113441	-1.01943	0.479179	-3.21109	5.26912	3.41313	scaffold_4	4217119	4218013	+
1113655	0.32879	0.748945	2.26465	-3.32193	1.82817	scaffold_4	4276950	4278347	-
1113942	0.32879	0.748945	3.18123	-3.32193	1.82817	scaffold_4	4343310	4345877	-
1114153	0.32879	0.748945	4.06504	-3.32193	1.82817	scaffold_4	4389308	4390125	+
1114219	-0.587356	0.685939	2.09269	4.59105	3.41313	scaffold_4	4400914	4404524	+
1114470	-0.720252	0.608938	4.48935	3.85408	1.82817	scaffold_4	4440775	4445051	+
1114527	0.433145	0.764932	3.7547	3.85408	4.63552	scaffold_4	4462650	4463325	-
1114770	-1.91023	0.109014	-0.510648	12.167	9.70468	scaffold_4	4498755	4499519	+
1114851	0.189768	0.889951	5.5637	5.26912	5.52861	scaffold_4	4527688	4529509	+
1114854	-0.474771	0.642431	-0.403733	2.26912	-3.32193	scaffold_4	4534347	4535061	+
1114886	-0.418177	0.770736	3.7776	3.85408	2.82817	scaffold_4	4529510	4534345	+
1115302	0.32879	0.748945	4.01773	-3.32193	1.82817	scaffold_5	50229	52497	-
1115356	-1.38595	0.337316	-4.21109	5.43904	2.82817	scaffold_5	65226	66022	+
1115481	0.32879	0.748945	2.53038	-3.32193	1.82817	scaffold_5	99401	101894	+
1115662	-0.474771	0.642431	2.1983	2.26912	-3.32193	scaffold_5	152479	153341	-
1116012	0.875562	0.48389	4.3851	-3.32193	3.41313	scaffold_5	209984	210579	+
1116188	0.06	0.06	-1.88916	-3.32193	-3.32193	scaffold_5	239720	241109	+
1116241	0.696556	0.631624	5.09041	3.26912	4.63552	scaffold_5	274649	278906	-
1116367	-0.828781	0.496118	-1.21109	3.26912	-3.32193	scaffold_5	292282	294096	+
1116766	0.396313	0.770353	6.64222	5.26912	5.82817	scaffold_5	363833	364877	+
1117080	-0.474771	0.642431	-2.21109	2.26912	-3.32193	scaffold_5	425017	426367	+
1117302	0.598909	0.672767	2.50316	2.26912	3.82817	scaffold_5	429732	431944	-
1117309	-0.101568	0.935242	2.53038	2.26912	1.82817	scaffold_5	435458	436935	-
1117470	-0.474771	0.642431	-0.123625	2.26912	-3.32193	scaffold_5	457687	458256	+
1117486	0.63309	0.577421	2.98858	-3.32193	2.82817	scaffold_5	459447	462675	-
1117619	0.696556	0.631624	6.31345	3.26912	4.63552	scaffold_5	477160	478682	-
1117654	0.875562	0.48389	2.73143	-3.32193	3.41313	scaffold_5	479344	480713	+
1117690	0.875562	0.48389	3.50316	-3.32193	3.41313	scaffold_5	482780	483780	-
1117774	-0.18886	0.896173	2.96882	3.85408	3.41313	scaffold_5	499062	501528	+
1117993	0.06	0.06	2.3435	-3.32193	-3.32193	scaffold_5	539369	541586	+
1118024	-0.101568	0.935242	4.50659	2.26912	1.82817	scaffold_5	546204	548587	+
1118208	0.178514	0.894103	-2.21109	2.26912	2.82817	scaffold_5	583322	583782	-
1118502	-0.101568	0.935242	1.21518	2.26912	1.82817	scaffold_5	637791	638505	-
1118730	-0.381831	0.788578	4.28076	5.07647	4.41313	scaffold_5	674322	676489	+
1119178	0.566673	0.696489	5.02013	3.26912	4.41313	scaffold_5	751271	755864	+
1119501	0.63309	0.577421	3.18979	-3.32193	2.82817	scaffold_5	826117	827644	-
1119609	0.32879	0.748945	-1.40373	-3.32193	1.82817	scaffold_5	837868	838559	+
1119720	-0.0248247	0.985394	6.44623	5.59105	5.52861	scaffold_5	851030	854599	-
1119863	0.32879	0.748945	3.31247	-3.32193	1.82817	scaffold_5	888634	890882	-
1119923	0.32879	0.748945	3.99348	-3.32193	1.82817	scaffold_5	904821	906244	+
1119936	-0.474771	0.642431	1.87637	2.26912	-3.32193	scaffold_5	923394	924595	-
1119996	0.465481	0.720255	5.64534	5.85408	6.47202	scaffold_5	943814	945253	-
1120009	-0.474771	0.642431	2.73143	2.26912	-3.32193	scaffold_5	942180	943813	+
1120283	0.0701075	0.96092	2.0557	3.26912	3.41313	scaffold_5	981993	983933	-
1120338	-0.393788	0.785857	4.68978	4.59105	3.82817	scaffold_5	994182	998870	+
1120437	-0.7483	0.605723	5.17477	4.85408	3.41313	scaffold_5	1009849	1013245	-
1120497	0.25854	0.85789	3.86573	3.26912	3.82817	scaffold_5	1029945	1030931	-
1120541	0.572091	0.670896	5.26465	5.26912	6.07609	scaffold_5	1028102	1029657	-
1120642	0.06	0.06	0.543799	-3.32193	-3.32193	scaffold_5	1054307	1056307	+
1121085	-0.288569	0.829181	5.38882	5.96956	5.52861	scaffold_5	1156543	1163559	+
1121211	7.49854e-08	1	3.26465	3.85408	3.82817	scaffold_5	1193064	1195231	-
1121286	0.32879	0.748945	0.788912	-3.32193	1.82817	scaffold_5	1208635	1209765	-
1121375	-1.13762	0.433035	4.31639	5.07647	2.82817	scaffold_5	1219097	1220728	+
1121525	-0.15499	0.912222	3.65928	3.26912	2.82817	scaffold_5	1246163	1247825	+
1121544	0.32879	0.748945	2.40362	-3.32193	1.82817	scaffold_5	1249739	1251230	-
1121619	-0.18886	0.896173	1.89744	3.85408	3.41313	scaffold_5	1262569	1264590	-
1121675	0.06	0.06	1.67155	-3.32193	-3.32193	scaffold_5	1269696	1271098	-
1121748	-0.444473	0.743451	-4.21109	3.26912	1.82817	scaffold_5	1275126	1276339	-
1122000	0.06	0.06	0.312474	-3.32193	-3.32193	scaffold_5	1337920	1339694	+
1122066	-0.587356	0.685939	2.12876	4.59105	3.41313	scaffold_5	1350243	1352774	+
1122129	0.535688	0.656933	6.01893	7.02401	7.68615	scaffold_5	1360572	1361568	+
1122196	0.537123	0.671933	6.17477	6.17601	6.87256	scaffold_5	1366235	1368175	+
1122610	0.32879	0.748945	2.29671	-3.32193	1.82817	scaffold_5	1437185	1437854	+
1122638	0.178514	0.894103	3.59627	2.26912	2.82817	scaffold_5	1445977	1448574	+
1122995	0.144965	0.905258	5.25039	7.02401	7.18572	scaffold_5	1529552	1530373	-
1123114	0.32879	0.748945	2.96882	-3.32193	1.82817	scaffold_5	1545617	1547550	+
1123319	0.25854	0.85789	2.80014	3.26912	3.82817	scaffold_5	1602929	1604294	-
1123436	0.06	0.06	-0.626126	-3.32193	-3.32193	scaffold_5	1620855	1622246	-
1123438	0.32879	0.748945	0.743108	-3.32193	1.82817	scaffold_5	1622059	1623232	-
1124148	-0.15499	0.912222	5.88299	3.26912	2.82817	scaffold_5	1782608	1784288	+
1124171	-0.693222	0.629893	4.18979	5.07647	3.82817	scaffold_5	1787988	1790846	+
1124221	0.63309	0.577421	1.40362	-3.32193	2.82817	scaffold_5	1786336	1788480	+
1124227	0.405441	0.770526	3.35877	2.26912	3.41313	scaffold_5	1784133	1784973	-
1124244	0.305167	0.833475	4.20254	3.85408	4.41313	scaffold_5	1794029	1795841	-
1124465	-0.720252	0.608938	-0.0411632	3.85408	1.82817	scaffold_5	1820560	1821570	+
1124542	-0.374648	0.788145	5.90005	5.43904	4.82817	scaffold_5	1836850	1838458	-
1124585	-0.18886	0.896173	4.42191	3.85408	3.41313	scaffold_5	1870321	1872059	+
1124655	-0.18886	0.896173	1.81128	3.85408	3.41313	scaffold_5	1886951	1887739	+
1124845	0.875562	0.48389	2.03684	-3.32193	3.41313	scaffold_5	1931551	1932314	+
1125283	-0.15499	0.912222	1.67155	3.26912	2.82817	scaffold_5	2011420	2012180	+
1125312	-0.15499	0.912222	2.93866	3.26912	2.82817	scaffold_5	2016513	2017639	-
1125919	0.752684	0.600339	5.11759	3.85408	5.15009	scaffold_5	2152194	2156355	-
1125993	0.32879	0.748945	0.181229	-3.32193	1.82817	scaffold_5	2173014	2174186	-
1125995	1.08435	0.4107	4.36634	-3.32193	3.82817	scaffold_5	2174187	2175699	-
1126333	-0.212381	0.88376	5.22145	4.26912	3.82817	scaffold_5	2255816	2257945	+
1126469	-0.474771	0.642431	0.0368393	2.26912	-3.32193	scaffold_5	2279739	2280877	-
1126503	-0.587356	0.685939	4.47541	4.59105	3.41313	scaffold_5	2292816	2294477	-
1127014	1.02097	0.480264	0.918195	3.26912	5.15009	scaffold_5	2394816	2395549	+
1127260	2.84207	0.023968	-2.21109	10.8578	14.6599	scaffold_5	2468422	2470039	+
1127270	3.83136	0.00420301	-2.62613	5.72855	11.4917	scaffold_5	2470562	2471769	+
1127427	-0.101568	0.935242	4.49627	2.26912	1.82817	scaffold_5	2486053	2487401	+
1127444	1.08435	0.4107	3.73728	-3.32193	3.82817	scaffold_5	2490890	2492720	-
1127554	0.162249	0.911088	3.6531	3.85408	4.15009	scaffold_5	2506195	2509813	+
1127594	0.06	0.06	-0.0411632	-3.32193	-3.32193	scaffold_5	2515099	2515847	+
1127614	0.63309	0.577421	1.37387	-3.32193	2.82817	scaffold_5	2518370	2519984	+
1128290	-0.101568	0.935242	0.958837	2.26912	1.82817	scaffold_5	2674547	2676382	+
1128719	-0.418177	0.770736	3.03684	3.85408	2.82817	scaffold_5	2771950	2772984	-
1128928	-0.418177	0.770736	4.11983	3.85408	2.82817	scaffold_5	2805389	2806936	+
1129079	0.63309	0.577421	-0.0411632	-3.32193	2.82817	scaffold_5	2837590	2838644	-
1129426	0.405441	0.770526	3.17262	2.26912	3.41313	scaffold_5	2921353	2922811	+
1129633	-0.15499	0.912222	3.5371	3.26912	2.82817	scaffold_5	2945439	2946973	+
1129810	0.32879	0.748945	1.48935	-3.32193	1.82817	scaffold_5	2978455	2979913	-
1129817	0.32879	0.748945	1.48935	-3.32193	1.82817	scaffold_5	2979703	2981169	-
1130017	0.06	0.06	2.0557	-3.32193	-3.32193	scaffold_5	3015799	3018312	-
1130184	-0.444473	0.743451	3.57027	3.26912	1.82817	scaffold_5	3080910	3083103	+
1130353	0.32879	0.748945	-2.62613	-3.32193	1.82817	scaffold_5	3118045	3118859	-
1130452	0.06	0.06	-3.32193	-3.32193	-3.32193	scaffold_5	3138751	3139252	+
1131232	0.0701075	0.96092	5.92974	3.26912	3.41313	scaffold_5	3304206	3305192	+
1131305	0.06	0.06	1.95884	-3.32193	-3.32193	scaffold_5	3331664	3332376	+
1131736	0.405441	0.770526	-0.88916	2.26912	3.41313	scaffold_6	6834	7797	+
1132176	1.08435	0.4107	4.43637	-3.32193	3.82817	scaffold_6	141144	141690	+
1132242	-0.15499	0.912222	1.37387	3.26912	2.82817	scaffold_6	143993	146090	-
1132379	0.32879	0.748945	1.5438	-3.32193	1.82817	scaffold_6	178130	179093	+
1132557	-0.101568	0.935242	3.48935	2.26912	1.82817	scaffold_6	222060	224271	-
1132740	-0.15499	0.912222	4.22354	3.26912	2.82817	scaffold_6	264513	267923	+
1132925	1.26608	0.352142	5.04394	-3.32193	4.15009	scaffold_6	288223	290627	+
1132990	0.06	0.06	-4.21109	-3.32193	-3.32193	scaffold_6	302050	302508	+
1133187	0.32879	0.748945	0.743108	-3.32193	1.82817	scaffold_6	340352	342108	-
1133309	0.0931958	0.948616	5.60909	4.26912	4.41313	scaffold_6	358228	362795	+
1133334	-0.101568	0.935242	2.28076	2.26912	1.82817	scaffold_6	356932	358226	-
1133376	0.32879	0.748945	-1.21109	-3.32193	1.82817	scaffold_6	385334	386201	-
1133557	0.06	0.06	-2.21109	-3.32193	-3.32193	scaffold_6	387403	387851	+
1133859	0.105728	0.926751	5.51683	8.2464	8.35173	scaffold_6	468721	470883	+
1133909	-0.00342462	0.997495	9.20676	11.5289	11.4988	scaffold_6	454380	468615	+
1133978	1.28363	0.377001	5.35497	2.26912	4.99809	scaffold_6	471253	474741	-
1133993	0.06	0.06	-4.21109	-3.32193	-3.32193	scaffold_6	474573	475105	-
1134069	7.49854e-08	1	3.0463	3.85408	3.82817	scaffold_6	497723	499999	+
1134090	-0.474771	0.642431	2.855	2.26912	-3.32193	scaffold_6	508823	510922	-
1134123	0.63309	0.577421	5.64689	-3.32193	2.82817	scaffold_6	517747	518775	-
1134176	0.63309	0.577421	1.21518	-3.32193	2.82817	scaffold_6	522210	523450	+
1134180	-0.101568	0.935242	3.12876	2.26912	1.82817	scaffold_6	520812	522255	-
1134285	-0.101568	0.935242	-3.21109	2.26912	1.82817	scaffold_6	564790	565526	-
1134288	-0.101568	0.935242	1.24834	2.26912	1.82817	scaffold_6	565264	567643	-
1135129	-0.89675	0.4199	0.543799	15.4087	14.2914	scaffold_6	699429	700306	+
1135341	-0.444473	0.743451	1.11084	3.26912	1.82817	scaffold_6	748752	749558	-
1135383	-0.444473	0.743451	1.07431	3.26912	1.82817	scaffold_6	753642	754325	+
1136011	0.32879	0.748945	4.09725	-3.32193	1.82817	scaffold_6	871371	872701	-
1136038	0.32879	0.748945	5.26869	-3.32193	1.82817	scaffold_6	873176	875080	-
1136197	0.06	0.06	1.89744	-3.32193	-3.32193	scaffold_6	912608	914036	-
1136493	-0.474771	0.642431	2.35877	2.26912	-3.32193	scaffold_6	975217	977577	-
1136625	0.245219	0.834413	1.97874	7.69538	7.97791	scaffold_6	999518	1001243	-
1137140	-0.15499	0.912222	-0.304198	3.26912	2.82817	scaffold_6	1105454	1106393	-
1137182	0.06	0.06	1.59627	-3.32193	-3.32193	scaffold_6	1114744	1115562	-
1137242	-0.119311	0.929538	5.71224	5.72855	5.52861	scaffold_6	1134979	1138638	-
1137364	0.875562	0.48389	3.80572	-3.32193	3.41313	scaffold_6	1155969	1157220	-
1137511	0.32879	0.748945	0.833306	-3.32193	1.82817	scaffold_6	1192208	1193714	+
1137546	7.36848e-08	1	1.97874	4.85408	4.82817	scaffold_6	1209523	1210748	-
1138209	0.265627	0.829058	7.0303	6.79268	7.11357	scaffold_6	1329521	1330621	-
1138613	0.06	0.06	-1.21109	-3.32193	-3.32193	scaffold_6	1407108	1408652	-
1138796	-0.101568	0.935242	-1.21109	2.26912	1.82817	scaffold_6	1431637	1432109	+
1138920	0.32879	0.748945	2.01773	-3.32193	1.82817	scaffold_6	1456183	1457770	+
1139004	7.49854e-08	1	5.80014	3.85408	3.82817	scaffold_6	1464263	1466277	-
1139080	-0.262129	0.851655	6.09611	5.26912	4.82817	scaffold_6	1492594	1495278	+
1139178	0.06	0.06	2.09269	-3.32193	-3.32193	scaffold_6	1514746	1515584	+
1139216	-0.15499	0.912222	4.55378	3.26912	2.82817	scaffold_6	1525908	1527131	+
1139422	0.32879	0.748945	1.14646	-3.32193	1.82817	scaffold_6	1535641	1536504	-
1139606	5.77488e-08	1	6.20992	5.85408	5.82817	scaffold_6	1575644	1580615	-
1139701	0.357537	0.800648	4.49972	4.59105	5.15009	scaffold_6	1586461	1588885	-
1139717	0.15604	0.91295	4.6685	4.59105	4.82817	scaffold_6	1597297	1598967	-
1139826	-0.15499	0.912222	2.84419	3.26912	2.82817	scaffold_6	1616062	1618627	+
1139832	0.280778	0.830355	4.00808	5.85408	6.22048	scaffold_6	1618651	1619769	+
1139885	0.32879	0.748945	1.83331	-3.32193	1.82817	scaffold_6	1636423	1637353	+
1140042	0.32879	0.748945	3.35877	-3.32193	1.82817	scaffold_6	1665451	1666863	-
1140077	-0.474771	0.642431	1.81128	2.26912	-3.32193	scaffold_6	1683378	1684262	+
1140099	-1.7591	0.215897	2.58333	4.85408	-3.32193	scaffold_6	1680164	1681085	-
1140250	-0.15499	0.912222	-2.62613	3.26912	2.82817	scaffold_6	1704254	1705038	-
1140319	-0.587356	0.685939	4.0463	4.59105	3.41313	scaffold_6	1718723	1722762	-
1140912	-0.474771	0.642431	2.5571	2.26912	-3.32193	scaffold_6	1826059	1827978	-
1141062	-0.101568	0.935242	2.31247	2.26912	1.82817	scaffold_6	1848520	1849796	-
1141478	-0.374648	0.788145	5.76046	5.43904	4.82817	scaffold_6	1925683	1931914	+
1141535	0.0701075	0.96092	3.41827	3.26912	3.41313	scaffold_6	1954601	1956385	+
1141581	-0.18886	0.896173	4.86573	3.85408	3.41313	scaffold_6	1976413	1977731	-
1141603	-0.15499	0.912222	3.83876	3.26912	2.82817	scaffold_6	1974576	1976412	+
1141844	0.06	0.06	-4.21109	-3.32193	-3.32193	scaffold_6	2006423	2007140	+
1142283	-1.78284	0.170572	2.70778	7.66144	5.15009	scaffold_6	2050000	2054470	+
1142367	0.460268	0.730846	6.34062	5.43904	6.07609	scaffold_6	2070398	2075133	+
1142382	0.405441	0.770526	4.4578	2.26912	3.41313	scaffold_6	2077765	2080000	-
1142383	0.06	0.06	2.64689	-3.32193	-3.32193	scaffold_6	2076634	2077763	-
1143199	0.25854	0.85789	2.90785	3.26912	3.82817	scaffold_6	2271784	2273313	-
1143302	-0.15499	0.912222	3.95382	3.26912	2.82817	scaffold_6	2288522	2290984	-
1143418	0.06	0.06	0.312474	-3.32193	-3.32193	scaffold_6	2327069	2328451	-
1143520	-0.0816105	0.950815	6.25039	5.96956	5.82817	scaffold_6	2350293	2358008	+
1143667	-1.37169	0.316947	2.60909	4.26912	-3.32193	scaffold_6	2385910	2387979	+
1143675	0.32879	0.748945	-1.21109	-3.32193	1.82817	scaffold_6	2387929	2388785	-
1143680	0.25854	0.85789	2.74311	3.26912	3.82817	scaffold_6	2389349	2390862	-
1143705	0.32879	0.748945	2.11084	-3.32193	1.82817	scaffold_6	2397517	2398835	-
1144094	0.566673	0.696489	6.10858	3.26912	4.41313	scaffold_6	2478369	2480716	+
1144510	1.08435	0.4107	3.86573	-3.32193	3.82817	scaffold_6	2596120	2599555	+
1144576	0.63309	0.577421	3.11084	-3.32193	2.82817	scaffold_6	2599415	2600375	-
1144705	-0.418177	0.770736	4.05101	3.85408	2.82817	scaffold_6	2633900	2634564	-
1144988	0.598909	0.672767	2.18123	2.26912	3.82817	scaffold_6	2709600	2711183	+
1145052	-0.444473	0.743451	0.788912	3.26912	1.82817	scaffold_6	2725989	2727278	+
1145310	0.06	0.06	-1.04116	-3.32193	-3.32193	scaffold_6	2766208	2767969	+
1145360	0.875562	0.48389	3.87637	-3.32193	3.41313	scaffold_6	2782834	2783659	-
1145548	0.684058	0.558753	6.26869	7.69538	8.52861	scaffold_6	2799090	2800256	-
1145623	1.26608	0.352142	5.06504	-3.32193	4.15009	scaffold_6	2806816	2810507	+
1145843	0.06	0.06	1.67155	-3.32193	-3.32193	scaffold_6	2873133	2874409	-
1146199	1.08435	0.4107	5.43277	-3.32193	3.82817	scaffold_6	2946538	2949064	+
1146247	0.06	0.06	0.312474	-3.32193	-3.32193	scaffold_6	2950782	2951935	-
1146294	3.01141	0.0281887	-1.21109	3.26912	8.05698	scaffold_6	2971669	2972561	-
1146390	0.32879	0.748945	-0.211088	-3.32193	1.82817	scaffold_6	2991243	2992338	+
1146558	-0.101568	0.935242	0.489352	2.26912	1.82817	scaffold_6	3050870	3051406	+
1146559	-0.262129	0.851655	4.82783	5.26912	4.82817	scaffold_6	3051407	3054739	+
1146623	0.32879	0.748945	2.64689	-3.32193	1.82817	scaffold_6	3068325	3069722	+
1147025	-0.15499	0.912222	1.5438	3.26912	2.82817	scaffold_6	3130429	3132067	+
1147027	-0.418177	0.770736	2.37387	3.85408	2.82817	scaffold_6	3131673	3132978	-
1147127	0.06	0.06	-1.88916	-3.32193	-3.32193	scaffold_6	3144676	3145687	+
1147168	1.07906	0.447397	2.86573	3.85408	5.63552	scaffold_6	3153576	3154062	+
1147552	-1.7591	0.215897	-3.32193	4.85408	-3.32193	scaffold_7	2027	2350	+
1147832	-0.474771	0.642431	2.47541	2.26912	-3.32193	scaffold_7	64126	65987	-
1147863	-0.177221	0.891605	5.55212	6.26912	5.99809	scaffold_7	72180	75855	+
1147957	-0.828781	0.496118	3.6531	3.26912	-3.32193	scaffold_7	86318	87963	+
1148140	-0.828781	0.496118	2.84419	3.26912	-3.32193	scaffold_7	123242	124075	+
1148145	-0.212381	0.88376	3.4824	4.26912	3.82817	scaffold_7	124429	126589	-
1148256	7.36848e-08	1	3.86573	4.85408	4.82817	scaffold_7	134097	134937	-
1148413	0.305167	0.833475	4.07431	3.85408	4.41313	scaffold_7	173827	177969	+
1148611	-0.7483	0.605723	4.88694	4.85408	3.41313	scaffold_7	208120	210096	+
1148831	0.32879	0.748945	2.11084	-3.32193	1.82817	scaffold_7	272415	273598	-
1148867	-0.101568	0.935242	4.15523	2.26912	1.82817	scaffold_7	282750	284857	-
1149412	-0.444473	0.743451	4.11983	3.26912	1.82817	scaffold_7	364248	367456	+
1149463	0.06	0.06	4.35497	-3.32193	-3.32193	scaffold_7	380054	381811	+
1149578	-0.444473	0.743451	6.65619	3.26912	1.82817	scaffold_7	384473	385341	+
1149601	0.875562	0.48389	2.50316	-3.32193	3.41313	scaffold_7	385341	386511	-
1149662	0.32879	0.748945	3.18123	-3.32193	1.82817	scaffold_7	403218	405080	-
1150120	-0.828781	0.496118	4.51001	3.26912	-3.32193	scaffold_7	505377	507153	+
1150374	-0.15499	0.912222	3.80572	3.26912	2.82817	scaffold_7	549636	550579	-
1150482	0.405441	0.770526	5.16395	2.26912	3.41313	scaffold_7	571177	571892	+
1150565	-0.15499	0.912222	0.876375	3.26912	2.82817	scaffold_7	592231	593706	+
1150585	0.06	0.06	-1.88916	-3.32193	-3.32193	scaffold_7	600066	600728	-
1150764	-0.101568	0.935242	2.03684	2.26912	1.82817	scaffold_7	665054	666951	+
1150765	5.1733e-08	1	6.13764	6.17601	6.15009	scaffold_7	666952	669668	+
1151380	0.06	0.06	-1.88916	-3.32193	-3.32193	scaffold_7	768038	769127	+
1151930	0.91755	0.52516	2.96882	2.26912	4.41313	scaffold_7	846139	848309	+
1152037	1.08435	0.4107	3.6531	-3.32193	3.82817	scaffold_7	872493	873864	-
1152119	-0.15499	0.912222	2.71965	3.26912	2.82817	scaffold_7	888666	889912	-
1152121	-0.101568	0.935242	2.50316	2.26912	1.82817	scaffold_7	890152	891925	+
1152355	-0.637949	0.659471	2.41827	4.26912	2.82817	scaffold_7	925237	926539	+
1152390	0.220597	0.878369	5.13764	4.26912	4.63552	scaffold_7	936815	938769	+
1152442	-3.85283	0.00400641	-1.21109	11.4834	5.63552	scaffold_7	946696	947486	-
1152465	0.06	0.06	-0.123625	-3.32193	-3.32193	scaffold_7	953177	954386	+
1152545	-0.0602828	0.965369	5.23806	5.26912	5.15009	scaffold_7	969307	974906	-
1153109	0.32879	0.748945	0.695802	-3.32193	1.82817	scaffold_7	1075992	1077006	-
1153380	0.06	0.06	0.11084	-3.32193	-3.32193	scaffold_7	1116913	1117351	+
1153478	-0.101568	0.935242	3.99837	2.26912	1.82817	scaffold_7	1138593	1140420	-
1153529	0.441046	0.757977	4.43637	4.26912	4.99809	scaffold_7	1150383	1151429	+
1153548	0.433145	0.764932	3.99348	3.85408	4.63552	scaffold_7	1151157	1153519	-
1153600	0.32879	0.748945	1.3435	-3.32193	1.82817	scaffold_7	1165428	1165856	+
1153653	1.08435	0.4107	3.60269	-3.32193	3.82817	scaffold_7	1172474	1173303	-
1153684	0.91755	0.52516	4.46487	2.26912	4.41313	scaffold_7	1175560	1176719	+
1153790	-0.587356	0.685939	3.80572	4.59105	3.41313	scaffold_7	1194579	1196335	-
1153888	0.178514	0.894103	3.20676	2.26912	2.82817	scaffold_7	1213387	1214666	-
1153946	-0.101568	0.935242	1.24834	2.26912	1.82817	scaffold_7	1230719	1232164	+
1154118	-0.444473	0.743451	0.743108	3.26912	1.82817	scaffold_7	1247514	1248278	+
1155047	0.25854	0.85789	1.5438	3.26912	3.82817	scaffold_7	1401057	1403581	-
1155092	0.32879	0.748945	-2.21109	-3.32193	1.82817	scaffold_7	1403784	1404976	+
1155201	1.05179	0.468034	5.08353	2.26912	4.63552	scaffold_7	1419934	1423635	-
1155693	0.655071	0.649379	5.39439	3.85408	4.99809	scaffold_7	1488208	1491845	+
1155728	0.598909	0.672767	4.33194	2.26912	3.82817	scaffold_7	1493860	1495381	+
1155942	-0.474771	0.642431	2.01773	2.26912	-3.32193	scaffold_7	1555548	1556144	+
1156000	0.32879	0.748945	1.3435	-3.32193	1.82817	scaffold_7	1580734	1581393	+
1156407	-0.212381	0.88376	3.02732	4.26912	3.82817	scaffold_7	1668243	1672571	-
1156452	1.05179	0.468034	2.71965	2.26912	4.63552	scaffold_7	1674034	1675148	+
1156456	0.0701075	0.96092	2.59627	3.26912	3.41313	scaffold_7	1674731	1675439	+
1156648	-0.101568	0.935242	3.17262	2.26912	1.82817	scaffold_7	1701673	1702132	-
1157012	0.63309	0.577421	3.68373	-3.32193	2.82817	scaffold_7	1762857	1764625	-
1157697	0.343	0.774616	9.22549	7.22331	7.63552	scaffold_7	1917184	1918409	-
1157988	0.178514	0.894103	3.0463	2.26912	2.82817	scaffold_7	1967379	1969557	-
1158149	-0.720252	0.608938	4.43277	3.85408	1.82817	scaffold_7	1995546	1997744	-
1158274	0.0701075	0.96092	4.33581	3.26912	3.41313	scaffold_7	2016355	2017844	-
1158331	-0.302231	0.81515	8.15359	6.43904	5.99809	scaffold_7	2019344	2026249	+
1158403	0.91755	0.52516	3.94878	2.26912	4.41313	scaffold_7	2050133	2052735	-
1158485	0.405441	0.770526	4.05101	2.26912	3.41313	scaffold_7	2079075	2079970	+
1158597	0.433145	0.764932	2.83331	3.85408	4.63552	scaffold_7	2094790	2095828	-
1158858	0.25854	0.85789	2.6218	3.26912	3.82817	scaffold_7	2134245	2134932	+
1159389	0.63309	0.577421	-0.510648	-3.32193	2.82817	scaffold_7	2231862	2233139	+
1159542	-0.587356	0.685939	2.81128	4.59105	3.41313	scaffold_7	2252664	2253362	-
1159922	0.06	0.06	1.64689	-3.32193	-3.32193	scaffold_7	2323885	2325878	+
1159926	0.0701075	0.96092	3.22354	3.26912	3.41313	scaffold_7	2330647	2331483	-
1160016	0.06	0.06	-0.751657	-3.32193	-3.32193	scaffold_7	2343255	2344855	-
1160148	0.451407	0.745374	6.74238	4.85408	5.52861	scaffold_7	2364094	2372080	-
1160388	0.875562	0.48389	4.58981	-3.32193	3.41313	scaffold_7	2396678	2398427	-
1160476	0.06	0.06	2.99837	-3.32193	-3.32193	scaffold_7	2428110	2429513	-
1160545	-0.660365	0.631049	6.14976	5.85408	4.82817	scaffold_7	2434864	2436837	-
1160719	-0.720252	0.608938	0.0368393	3.85408	1.82817	scaffold_7	2470713	2473256	+
1160917	0.0443607	0.970706	7.43051	7.22331	7.25443	scaffold_7	2522207	2527957	-
1160919	1.02097	0.480264	6.01291	3.26912	5.15009	scaffold_7	2528668	2534995	+
1161178	-0.115191	0.935568	4.30066	4.85408	4.63552	scaffold_7	2600260	2601433	+
1161299	0.06	0.06	2.57027	-3.32193	-3.32193	scaffold_7	2643526	2645617	+
1161463	0.06	0.06	0.312474	-3.32193	-3.32193	scaffold_7	2656636	2657361	-
1161480	0.0701075	0.96092	3.51001	3.26912	3.41313	scaffold_7	2659135	2660181	+
1161700	-0.101568	0.935242	2.48935	2.26912	1.82817	scaffold_7	2697182	2699523	-
1161743	0.655071	0.649379	4.21098	3.85408	4.99809	scaffold_7	2708870	2711000	+
1161820	0.06	0.06	3.02732	-3.32193	-3.32193	scaffold_7	2719286	2720372	+
1162059	-0.444473	0.743451	1.6218	3.26912	1.82817	scaffold_7	2736359	2737982	+
1162070	0.421972	0.771084	4.16829	3.26912	4.15009	scaffold_7	2745356	2746739	-
1162432	0.178514	0.894103	1.07431	2.26912	2.82817	scaffold_7	2827764	2829861	+
1162745	0.32879	0.748945	-2.21109	-3.32193	1.82817	scaffold_8	21157	23111	-
1163005	0.32879	0.748945	2.88694	-3.32193	1.82817	scaffold_8	76707	79305	-
1163101	-1.12564	0.392724	2.23186	3.85408	-3.32193	scaffold_8	117760	119946	-
1163314	-0.456322	0.685013	-3.32193	9.5729	8.98804	scaffold_8	216508	216890	+
1163333	1.35077	0.346101	4.88694	3.26912	5.63552	scaffold_8	225473	228655	-
1163445	0.0776982	0.954554	6.47804	5.43904	5.52861	scaffold_8	245482	250186	+
1163465	0.06	0.06	4.76905	-3.32193	-3.32193	scaffold_8	252848	254124	+
1163493	0.06	0.06	-1.62613	-3.32193	-3.32193	scaffold_8	264548	266005	+
1163614	0.06	0.06	-2.21109	-3.32193	-3.32193	scaffold_8	300362	301821	-
1163661	0.06	0.06	2.65928	-3.32193	-3.32193	scaffold_8	306542	308862	-
1164003	0.06	0.06	-3.32193	-3.32193	-3.32193	scaffold_8	400158	400848	-
1164082	1.26608	0.352142	-0.123625	-3.32193	4.15009	scaffold_8	425739	426979	-
1164142	-1.58013	0.259768	-0.751657	4.59105	-3.32193	scaffold_8	442131	443747	+
1164223	0.767871	0.592441	1.89744	2.26912	4.15009	scaffold_8	456655	457808	-
1164237	1.23315	0.365677	3.32029	4.59105	6.41313	scaffold_8	457839	458811	-
1165048	0.32879	0.748945	0.543799	-3.32193	1.82817	scaffold_8	593026	593941	+
1165837	-0.311598	0.789654	6.11871	8.15176	7.73506	scaffold_8	755398	757051	+
1165845	1.19741	0.405705	5.39809	3.26912	5.41313	scaffold_8	751228	755396	+
1166043	-0.474771	0.642431	3.32807	2.26912	-3.32193	scaffold_8	781510	784431	-
1166064	-0.474771	0.642431	4.82509	2.26912	-3.32193	scaffold_8	790211	791695	+
1166077	0.178514	0.894103	1.14646	2.26912	2.82817	scaffold_8	791921	794612	+
1166322	-0.474771	0.642431	3.40362	2.26912	-3.32193	scaffold_8	826776	828006	-
1166330	-0.212381	0.88376	4.16395	4.26912	3.82817	scaffold_8	825626	826825	-
1166344	0.405441	0.770526	3.29671	2.26912	3.41313	scaffold_8	836853	839179	-
1166826	-0.474771	0.642431	0.489352	2.26912	-3.32193	scaffold_8	917868	918782	+
1166847	0.06	0.06	3.23186	-3.32193	-3.32193	scaffold_8	936106	938263	-
1166853	0.63309	0.577421	2.89744	-3.32193	2.82817	scaffold_8	938524	941050	-
1167056	-0.474771	0.642431	3.02732	2.26912	-3.32193	scaffold_8	997730	998559	-
1167190	-0.0602828	0.965369	5.1983	5.26912	5.15009	scaffold_8	1030474	1032301	-
1167311	0.767871	0.592441	5.14426	2.26912	4.15009	scaffold_8	1060673	1065842	+
1167360	-0.101568	0.935242	2.64689	2.26912	1.82817	scaffold_8	1065824	1067792	+
1167456	0.63309	0.577421	0.743108	-3.32193	2.82817	scaffold_8	1089366	1090827	-
1167518	0.32879	0.748945	4.92846	-3.32193	1.82817	scaffold_8	1122157	1123466	-
1167642	7.49854e-08	1	1.76619	3.85408	3.82817	scaffold_8	1137694	1138558	+
1167926	0.711052	0.615684	5.43277	4.26912	5.41313	scaffold_8	1207496	1209482	-
1168442	0.06	0.06	1.24834	-3.32193	-3.32193	scaffold_8	1309044	1310509	-
1168654	-2.37944	0.101161	0.0368393	5.72855	-3.32193	scaffold_8	1368316	1369347	-
1168884	0.357993	0.787858	5.88694	5.59105	6.07609	scaffold_8	1422842	1426749	-
1169044	0.405441	0.770526	3.35115	2.26912	3.41313	scaffold_8	1459252	1460691	+
1169074	0.63309	0.577421	2.89744	-3.32193	2.82817	scaffold_8	1469364	1470053	-
1169098	0.224141	0.853624	6.74674	7.02401	7.2876	scaffold_8	1478639	1480149	-
1169433	-0.765829	0.589127	3.37387	5.43904	4.15009	scaffold_8	1532941	1535440	-
1169863	0.32879	0.748945	2.01773	-3.32193	1.82817	scaffold_8	1600659	1601624	+
1169882	0.25854	0.85789	2.74311	3.26912	3.82817	scaffold_8	1601596	1602489	+
1169920	0.32879	0.748945	3.43277	-3.32193	1.82817	scaffold_8	1608355	1609454	-
1170246	0.386074	0.737671	8.0005	8.10201	8.55609	scaffold_8	1691048	1705880	-
1170363	-0.15499	0.912222	2.43277	3.26912	2.82817	scaffold_8	1729981	1731301	-
1170387	-0.614017	0.638601	4.83057	6.51705	5.63552	scaffold_8	1739947	1746623	+
1170764	0.162249	0.911088	3.62812	3.85408	4.15009	scaffold_8	1842338	1845233	-
1171231	0.598909	0.672767	2.76619	2.26912	3.82817	scaffold_8	1927315	1928195	+
1171340	-0.393788	0.785857	5.00808	4.59105	3.82817	scaffold_8	1959557	1961439	+
1171418	-0.15499	0.912222	3.46134	3.26912	2.82817	scaffold_8	1965348	1966914	+
1171485	0.06	0.06	-3.32193	-3.32193	-3.32193	scaffold_8	1988942	1989455	-
1171587	-0.101568	0.935242	5.99226	2.26912	1.82817	scaffold_9	19515	20759	-
1171614	7.49854e-08	1	5.80433	3.85408	3.82817	scaffold_9	27714	29798	-
1172022	-0.229706	0.873664	4.58657	4.59105	4.15009	scaffold_9	87624	90328	-
1172142	-0.444473	0.743451	2.50316	3.26912	1.82817	scaffold_9	103515	105977	-
1172544	0.178514	0.894103	0.695802	2.26912	2.82817	scaffold_9	193794	194985	-
1172627	-0.720252	0.608938	5.73874	3.85408	1.82817	scaffold_9	202016	203841	+
1172714	0.0701075	0.96092	1.76619	3.26912	3.41313	scaffold_9	213691	215983	+
1172773	-0.101568	0.935242	2.07431	2.26912	1.82817	scaffold_9	210999	213450	+
1172909	7.36848e-08	1	4.93102	4.85408	4.82817	scaffold_9	219870	222217	-
1173221	0.32879	0.748945	2.37387	-3.32193	1.82817	scaffold_9	277408	278254	-
1173524	0.875562	0.48389	1.03684	-3.32193	3.41313	scaffold_9	316710	318523	-
1173571	0.32879	0.748945	2.71965	-3.32193	1.82817	scaffold_9	318524	320110	-
1173885	-1.12564	0.392724	2.6218	3.85408	-3.32193	scaffold_9	368107	369779	-
1173913	0.655071	0.649379	3.84961	3.85408	4.99809	scaffold_9	375784	378748	+
1174160	0.421972	0.771084	3.58981	3.26912	4.15009	scaffold_9	429695	434876	+
1174213	0.694202	0.529672	0.695802	11.9238	12.7396	scaffold_9	442773	445550	-
1174228	-0.523091	0.641273	-1.62613	9.81601	9.15009	scaffold_9	445551	447218	-
1174842	-0.15499	0.912222	5.04394	3.26912	2.82817	scaffold_9	567897	569547	-
1174953	-0.444473	0.743451	3.25652	3.26912	1.82817	scaffold_9	604136	607028	+
1174959	1.08435	0.4107	3.21518	-3.32193	3.82817	scaffold_9	606974	608175	+
1175250	0.178514	0.894103	1.46134	2.26912	2.82817	scaffold_9	672105	673307	-
1175349	0.06	0.06	1.14646	-3.32193	-3.32193	scaffold_9	678656	681224	+
1175373	0.32879	0.748945	2.35877	-3.32193	1.82817	scaffold_9	686891	688117	-
1175410	0.06	0.06	2.68373	-3.32193	-3.32193	scaffold_9	691313	692525	+
1175876	-1.40261	0.236895	-4.21109	9.51705	7.71081	scaffold_9	743897	744836	+
1175983	0.91755	0.52516	2.86573	2.26912	4.41313	scaffold_9	771130	772516	+
1176003	0.421972	0.771084	3.43996	3.26912	4.15009	scaffold_9	778514	780328	-
1176078	-0.826751	0.569208	4.43277	4.59105	2.82817	scaffold_9	791961	794363	+
1176709	0.63309	0.577421	1.46134	-3.32193	2.82817	scaffold_9	960969	961717	-
1176909	0.63309	0.577421	2.92846	-3.32193	2.82817	scaffold_9	996758	999625	-
1176926	0.32879	0.748945	2.32807	-3.32193	1.82817	scaffold_9	992463	994923	-
1177070	-0.101568	0.935242	-0.123625	2.26912	1.82817	scaffold_9	1018583	1021560	+
1177400	-1.30697	0.352632	-1.88916	5.96956	3.82817	scaffold_9	1083506	1084414	+
1177410	0.06	0.06	1.37387	-3.32193	-3.32193	scaffold_9	1086331	1088014	+
1177469	-0.991645	0.494891	5.22354	4.85408	2.82817	scaffold_9	1100637	1103264	+
1177477	0.63309	0.577421	1.855	-3.32193	2.82817	scaffold_9	1103167	1103857	-
1177816	0.91755	0.52516	3.98367	2.26912	4.41313	scaffold_9	1168569	1169746	-
1177936	0.259148	0.81177	-2.62613	12.8783	13.1641	scaffold_9	1206266	1207290	-
1178194	0.06	0.06	0.876375	-3.32193	-3.32193	scaffold_9	1246663	1250632	-
1178347	0.446902	0.751374	5.67308	4.59105	5.2876	scaffold_9	1275809	1281650	+
1178431	-0.0864974	0.952073	3.95382	4.59105	4.41313	scaffold_9	1287195	1288118	+
1178732	0.32879	0.748945	2.07431	-3.32193	1.82817	scaffold_9	1368213	1370124	-
1178915	-1.12564	0.392724	3.71965	3.85408	-3.32193	scaffold_9	1407444	1408927	+
1179058	0.06	0.06	5.97006	-3.32193	-3.32193	scaffold_9	1421979	1425144	+
1245414	0.305167	0.833475	1.5438	3.85408	4.41313	scaffold_11	228410	229366	-
1245471	0.06	0.06	2.14646	-3.32193	-3.32193	scaffold_2	1876754	1878172	+
1245517	-0.18886	0.896173	2.53038	3.85408	3.41313	scaffold_2	1078657	1080318	+
1245583	0.0701075	0.96092	3.50316	3.26912	3.41313	scaffold_5	2201964	2203863	-
1245696	0.178514	0.894103	2.48935	2.26912	2.82817	scaffold_8	666114	667383	+
1245787	0.32879	0.748945	0.833306	-3.32193	1.82817	scaffold_3	2744202	2746691	-
1245807	0.06	0.06	-4.21109	-3.32193	-3.32193	scaffold_13	462404	462873	-
1245960	0.0701075	0.96092	4.56699	3.26912	3.41313	scaffold_2	2121289	2121991	-
1246065	-0.828781	0.496118	2.94878	3.26912	-3.32193	scaffold_8	480473	482421	+
1246239	0.584873	0.590854	0.489352	-3.32193	10.593	scaffold_7	814497	814898	+
1246294	-1.85295	0.144518	-3.32193	8.26912	5.73506	scaffold_8	1375165	1375317	+
1246333	0.32879	0.748945	2.14646	-3.32193	1.82817	scaffold_4	1690659	1691306	+
1246502	0.598909	0.672767	2.12876	2.26912	3.82817	scaffold_7	2202193	2203233	-
1246535	0.32879	0.748945	5.25652	-3.32193	1.82817	scaffold_8	1456474	1457301	-
1246596	0.06	0.06	-1.62613	-3.32193	-3.32193	scaffold_1	4210577	4210917	+
1246668	0.06	0.06	-3.32193	-3.32193	-3.32193	scaffold_6	2442186	2442374	-
1246722	0.06	0.06	0.373874	-3.32193	-3.32193	scaffold_2	3502633	3502971	+
1247076	0.06	0.06	2.26465	-3.32193	-3.32193	scaffold_1	4214828	4215244	+
1247280	0.32879	0.748945	0.0368393	-3.32193	1.82817	scaffold_2	3579707	3580273	-
1247777	0.06	0.06	-2.62613	-3.32193	-3.32193	scaffold_13	473734	474039	-
1247927	0.63309	0.577421	6.13543	-3.32193	2.82817	scaffold_9	795306	795797	-
1247977	0.06	0.06	2.64689	-3.32193	-3.32193	scaffold_11	264038	264778	-
1248067	0.06	0.06	-1.04116	-3.32193	-3.32193	scaffold_4	2091262	2091564	+
1248268	-0.101568	0.935242	1.31247	2.26912	1.82817	scaffold_3	36594	36809	-
1248331	0.32879	0.748945	-0.403733	-3.32193	1.82817	scaffold_7	33183	33467	-
1248551	-0.474771	0.642431	2.07431	2.26912	-3.32193	scaffold_8	207996	208930	+
1248677	0.06	0.06	-3.32193	-3.32193	-3.32193	scaffold_4	272881	273165	-
1248802	0.32879	0.748945	3.25652	-3.32193	1.82817	scaffold_8	562157	562552	+
1248931	0.06	0.06	-3.32193	-3.32193	-3.32193	scaffold_4	292778	292939	+
1248942	-0.101568	0.935242	-4.21109	2.26912	1.82817	scaffold_7	2159147	2159503	+
1249328	0.32879	0.748945	-2.62613	-3.32193	1.82817	scaffold_7	16216	16386	+
1249526	0.32879	0.748945	-2.62613	-3.32193	1.82817	scaffold_4	783077	783454	+
1249554	-2.26087	0.108333	-0.211088	6.66144	2.82817	scaffold_3	2226595	2227187	-
1249919	0.06	0.06	-4.21109	-3.32193	-3.32193	scaffold_4	2235976	2236311	+
1249930	3.81153	0.00545062	-4.21109	3.26912	9.53552	scaffold_2	2038711	2039247	-
1249944	-0.101568	0.935242	-3.32193	2.26912	1.82817	scaffold_7	2238108	2238538	+
1249971	-1.12564	0.392724	3.32029	3.85408	-3.32193	scaffold_2	1944259	1946064	+
1250147	0.06	0.06	-1.62613	-3.32193	-3.32193	scaffold_9	179790	180175	-
1250336	0.06	0.06	0.876375	-3.32193	-3.32193	scaffold_10	501712	502086	-
1250640	0.06	0.06	-2.62613	-3.32193	-3.32193	scaffold_2	1938308	1938809	+
1250933	-0.444473	0.743451	-0.751657	3.26912	1.82817	scaffold_1	5495030	5495212	-
1251039	0.06	0.06	-3.32193	-3.32193	-3.32193	scaffold_3	3342816	3343016	+
1251179	-0.474771	0.642431	1.21518	2.26912	-3.32193	scaffold_7	496970	497999	+
1251323	-0.15499	0.912222	3.38882	3.26912	2.82817	scaffold_1	2471158	2472582	+
1251422	0.32879	0.748945	-0.211088	-3.32193	1.82817	scaffold_3	4084367	4084822	-
1251437	-0.63433	0.578724	-3.32193	9.22331	8.41313	scaffold_2	3089968	3090138	+
1251569	0.06	0.06	-3.21109	-3.32193	-3.32193	scaffold_3	1396768	1396941	+
1251587	0.32879	0.748945	0.248343	-3.32193	1.82817	scaffold_2	2924608	2924883	+
1251695	0.06	0.06	-4.21109	-3.32193	-3.32193	scaffold_9	1172533	1172829	-
1251703	-0.314801	0.776137	-1.40373	10.2915	9.88345	scaffold_9	1432773	1433027	+
1252030	-0.474771	0.642431	-0.88916	2.26912	-3.32193	scaffold_2	4349416	4349840	+
1252154	0.06	0.06	-2.21109	-3.32193	-3.32193	scaffold_5	401078	401482	+
1252464	0.875562	0.48389	2.78891	-3.32193	3.41313	scaffold_8	876882	878143	-
1252733	-0.0495273	0.972754	2.03684	4.26912	4.15009	scaffold_4	3324554	3325957	-
1253249	0.63309	0.577421	2.6958	-3.32193	2.82817	scaffold_9	275448	275600	+
1253271	0.06	0.06	1.51683	-3.32193	-3.32193	scaffold_8	960670	961607	-
1253334	0.06	0.06	-3.32193	-3.32193	-3.32193	scaffold_2	1893502	1894012	+
1253437	0.06	0.06	-4.21109	-3.32193	-3.32193	scaffold_2	3531979	3532227	-
1253523	0.509136	0.697241	8.58475	5.72855	6.41313	scaffold_11	247029	247510	-
1253528	-0.584432	0.591026	-1.04116	9.34593	-3.32193	scaffold_2	1665472	1665981	+
1253552	0.06	0.06	-4.21109	-3.32193	-3.32193	scaffold_2	1121313	1121657	+
1253601	0.06	0.06	-3.32193	-3.32193	-3.32193	scaffold_3	2149043	2149261	+
1253624	0.32879	0.748945	-1.21109	-3.32193	1.82817	scaffold_2	3081191	3082366	+
1253668	0.32879	0.748945	-3.21109	-3.32193	1.82817	scaffold_8	299784	299996	+
1253806	1.08435	0.4107	2.29671	-3.32193	3.82817	scaffold_4	3460698	3463057	+
1254075	0.06	0.06	-3.32193	-3.32193	-3.32193	scaffold_3	1340064	1340330	+
1254095	-0.474771	0.642431	-3.21109	2.26912	-3.32193	scaffold_10	360535	360744	-
1254104	0.06	0.06	2.7776	-3.32193	-3.32193	scaffold_8	896224	897336	-
1254111	0.06	0.06	-4.21109	-3.32193	-3.32193	scaffold_8	959626	959912	+
1254212	0.06	0.06	1.03684	-3.32193	-3.32193	scaffold_7	2258368	2259028	-
1254239	-1.7591	0.215897	-3.21109	4.85408	-3.32193	scaffold_5	2092094	2092609	-
1254290	0.06	0.06	-1.88916	-3.32193	-3.32193	scaffold_2	2396580	2396789	-
1254321	0.854854	0.481983	-2.62613	6.79268	7.87256	scaffold_3	1601826	1602164	+
1254334	0.32879	0.748945	1.76619	-3.32193	1.82817	scaffold_3	44510	44818	+
1254517	0.06	0.06	-2.21109	-3.32193	-3.32193	scaffold_4	3128256	3128450	-
1254543	0.32879	0.748945	1.97874	-3.32193	1.82817	scaffold_2	3054836	3055782	+
1254623	0.32879	0.748945	2.60909	-3.32193	1.82817	scaffold_2	715215	715615	-
1254646	0.06	0.06	2.12876	-3.32193	-3.32193	scaffold_8	1560615	1561661	-
1254666	0.06	0.06	-1.04116	-3.32193	-3.32193	scaffold_11	261284	261610	+
1254732	0.06	0.06	-1.88916	-3.32193	-3.32193	scaffold_3	2595279	2595506	-
1254859	0.548609	0.623233	-0.0411632	9.5729	10.2162	scaffold_12	92181	92402	+
1254893	-0.32748	0.767632	-1.40373	10.2291	9.80545	scaffold_6	3261454	3261708	+
1255315	-0.314801	0.776137	-1.40373	10.2915	9.88345	scaffold_2	4877898	4878152	+
1255603	0.06	0.06	-2.62613	-3.32193	-3.32193	scaffold_3	1680848	1681033	+
1255634	0.06	0.06	-3.32193	-3.32193	-3.32193	scaffold_7	678962	679300	+
1255723	0.06	0.06	4.18123	-3.32193	-3.32193	scaffold_4	3029699	3029968	+
1255858	2.43413	0.0510832	-1.40373	7.35658	10.573	scaffold_3	772893	773369	+
1255914	3.51074	0.00773271	-1.88916	6.26912	11.3399	scaffold_2	3168937	3169833	+
1255951	0.875562	0.48389	2.0557	-3.32193	3.41313	scaffold_3	4143073	4143306	-
1255955	0.0034132	0.997496	-1.62613	12.3094	12.2876	scaffold_5	2960293	2960814	+
1256008	-0.0556429	0.959434	-1.40373	11.0861	10.9931	scaffold_2	611846	612829	+
1256069	-0.474771	0.642431	-2.62613	2.26912	-3.32193	scaffold_2	1483335	1483640	+
1256325	-0.304559	0.783821	-2.62613	10.0635	9.66737	scaffold_3	2308115	2308279	-
1256881	0.06	0.06	-0.626126	-3.32193	-3.32193	scaffold_6	3158251	3158580	-
1256965	-0.502154	0.646558	-4.21109	13.2464	12.6144	scaffold_1	1084191	1084385	+
1257008	0.06	0.06	2.59627	-3.32193	-3.32193	scaffold_3	3192428	3192895	+
1257064	0.06	0.06	-0.626126	-3.32193	-3.32193	scaffold_4	3645934	3646288	+
1257106	-0.101568	0.935242	2.6218	2.26912	1.82817	scaffold_10	231831	232907	-
1257142	0.06	0.06	-3.32193	-3.32193	-3.32193	scaffold_9	451217	451450	+
1257156	-0.0495273	0.972754	1.78891	4.26912	4.15009	scaffold_9	525634	526886	+
1257159	0.178514	0.894103	4.5571	2.26912	2.82817	scaffold_6	1847717	1848504	+
1257171	0.285227	0.795431	-2.62613	10.4834	10.8026	scaffold_13	512398	512769	+
1257267	0.06	0.06	-4.21109	-3.32193	-3.32193	scaffold_1	1617510	1617816	-
1257408	-0.474771	0.642431	0.543799	2.26912	-3.32193	scaffold_7	2348836	2349282	-
1257430	-0.101568	0.935242	-0.751657	2.26912	1.82817	scaffold_8	1629623	1630306	-
1257486	-0.742176	0.501595	-1.62613	14.0043	13.0785	scaffold_9	1416891	1417487	-
1257564	0.32879	0.748945	1.03684	-3.32193	1.82817	scaffold_9	315063	315263	-
1257595	0.06	0.06	-0.751657	-3.32193	-3.32193	scaffold_8	1871232	1871477	-
1257662	0.06	0.06	-1.40373	-3.32193	-3.32193	scaffold_5	2770497	2770745	+
1257669	-0.474771	0.642431	0.958837	2.26912	-3.32193	scaffold_9	40511	41125	+
1257702	0.06	0.06	-3.32193	-3.32193	-3.32193	scaffold_1	4777436	4777886	+
1257738	0.63309	0.577421	1.83331	-3.32193	2.82817	scaffold_4	682967	683143	+
1257802	0.06	0.06	-3.21109	-3.32193	-3.32193	scaffold_14	63599	63841	+
1257982	1.98325	0.123679	-3.21109	5.43904	8.15009	scaffold_10	290028	290471	+
1258164	-0.216319	0.844154	-0.88916	10.6354	10.3478	scaffold_1	5585950	5586111	+
1258258	-0.444473	0.743451	1.31247	3.26912	1.82817	scaffold_13	76541	77416	-
1258316	0.06	0.06	1.93866	-3.32193	-3.32193	scaffold_2	563458	563796	+
1258442	0.06	0.06	0.248343	-3.32193	-3.32193	scaffold_8	1723290	1723814	-
1258582	0.06	0.06	-4.21109	-3.32193	-3.32193	scaffold_4	4481620	4481802	-
1258699	-0.474771	0.642431	-0.510648	2.26912	-3.32193	scaffold_3	443241	443777	+
1258705	0.63309	0.577421	3.64066	-3.32193	2.82817	scaffold_1	975670	976223	+
1258844	0.324605	0.768363	-2.62613	10.3406	10.7077	scaffold_5	2717309	2718675	-
1259009	0.814409	0.57473	5.76476	3.26912	4.82817	scaffold_4	2922466	2923273	-
1259176	0.405441	0.770526	4.00808	2.26912	3.41313	scaffold_6	2881016	2881454	-
1259319	-0.444473	0.743451	2.65928	3.26912	1.82817	scaffold_4	4176842	4178045	-
1259333	2.50344	0.0849062	-3.32193	-3.32193	5.99809	scaffold_5	2684205	2684537	-
1259367	-0.765109	0.493823	-3.32193	10.973	10.013	scaffold_13	543909	544175	+
1259419	0.598909	0.672767	5.31834	2.26912	3.82817	scaffold_9	86282	87222	+
1259457	-0.474771	0.642431	1.40362	2.26912	-3.32193	scaffold_2	1651458	1651616	-
1259463	-0.21651	0.842276	-1.88916	12.8644	12.578	scaffold_5	2597103	2598749	-
1259477	0.0400917	0.970557	5.47541	12.8073	12.8296	scaffold_3	2303500	2305248	-
1259542	0.06	0.06	2.14646	-3.32193	-3.32193	scaffold_1	716336	717047	+
1259746	0.32879	0.748945	-3.32193	-3.32193	1.82817	scaffold_14	218732	219157	-
1259811	-0.474771	0.642431	3.41096	2.26912	-3.32193	scaffold_4	2199060	2200007	-
1259872	-0.556119	0.614995	-2.21109	11.2464	10.5458	scaffold_11	162680	162977	+
1259979	0.06	0.06	-4.21109	-3.32193	-3.32193	scaffold_3	2018631	2018888	+
1260113	-0.0813528	0.94065	-2.62613	11.3053	11.1813	scaffold_11	497735	498034	-
1260127	-0.418177	0.770736	1.11084	3.85408	2.82817	scaffold_5	2301768	2302712	+
1260383	0.06	0.06	1.21518	-3.32193	-3.32193	scaffold_1	2641843	2642121	-
1260569	-0.101568	0.935242	3.40362	2.26912	1.82817	scaffold_1	4968827	4970415	-
1260720	0.32879	0.748945	0.998365	-3.32193	1.82817	scaffold_13	247943	248904	-
1260731	0.06	0.06	0.543799	-3.32193	-3.32193	scaffold_1	3383586	3383963	+
1260757	-0.422428	0.703445	-4.21109	10.3619	9.82252	scaffold_3	2915710	2915975	-
1260873	-1.03499	0.363449	-3.21109	10.591	9.2876	scaffold_1	3149165	3149599	+
1260906	0.0388046	0.976458	5.32029	5.96956	5.99809	scaffold_2	4423386	4423789	+
1261001	-0.474771	0.642431	0.833306	2.26912	-3.32193	scaffold_2	192319	193081	+
1261054	0.06	0.06	-3.32193	-3.32193	-3.32193	scaffold_8	1720943	1721236	+
1261246	0.18215	0.873546	-3.32193	8.35658	8.55609	scaffold_9	347532	347963	+
1261393	1.08435	0.4107	0.596267	-3.32193	3.82817	scaffold_7	705577	706020	+
1261582	0.405441	0.770526	4.1596	2.26912	3.41313	scaffold_3	376075	379034	+
1261664	-0.474771	0.642431	-1.04116	2.26912	-3.32193	scaffold_4	4274923	4275999	+
1261739	-0.15499	0.912222	-0.626126	3.26912	2.82817	scaffold_6	637423	638028	+
1261800	-1.21147	0.310736	-3.21109	8.79268	7.22048	scaffold_1	4996281	4996680	-
1262543	0.63309	0.577421	2.26465	-3.32193	2.82817	scaffold_12	128411	129187	-
1262569	1.38484	0.340482	-0.510648	2.26912	5.15009	scaffold_3	3161291	3161440	+
1262631	0.405441	0.770526	-0.123625	2.26912	3.41313	scaffold_2	2911272	2912111	-
1262645	0.06	0.06	-3.32193	-3.32193	-3.32193	scaffold_9	1029386	1029748	+
1262825	0.63309	0.577421	2.97874	-3.32193	2.82817	scaffold_1	3787294	3788040	-
1263048	-0.0649991	0.952626	-1.62613	11.0797	10.9754	scaffold_1	370986	371969	-
1263129	0.06	0.06	-3.32193	-3.32193	-3.32193	scaffold_8	1721920	1722294	+
1263208	0.32879	0.748945	-3.32193	-3.32193	1.82817	scaffold_4	1230455	1230640	+
1263353	0.405441	0.770526	4.39994	2.26912	3.41313	scaffold_1	2051753	2053296	-
1263404	0.06	0.06	-0.304198	-3.32193	-3.32193	scaffold_3	4174228	4175055	+
1263601	0.405441	0.770526	3.39624	2.26912	3.41313	scaffold_9	364891	365443	+
1263609	0.06	0.06	-4.21109	-3.32193	-3.32193	scaffold_4	93690	94039	+
1263689	-0.828781	0.496118	0.695802	3.26912	-3.32193	scaffold_7	405114	405477	-
1263725	0.06	0.06	-1.21109	-3.32193	-3.32193	scaffold_12	362738	363105	+
1263798	0.32879	0.748945	-0.123625	-3.32193	1.82817	scaffold_1	435048	435518	+
1263975	0.06	0.06	-4.21109	-3.32193	-3.32193	scaffold_3	562294	562518	-
1263994	0.460737	0.677412	-0.626126	10.102	10.6355	scaffold_9	1331777	1331932	-
1263996	0.549092	0.70394	-0.751657	3.85408	4.82817	scaffold_13	20869	21270	-
1264074	-0.444473	0.743451	4.98367	3.26912	1.82817	scaffold_2	3212479	3213213	-
1264188	0.32879	0.748945	0.695802	-3.32193	1.82817	scaffold_4	2887404	2887789	-
1264332	-0.828781	0.496118	-0.626126	3.26912	-3.32193	scaffold_1	2797109	2798288	-
1264461	-0.165615	0.879257	-2.62613	11.9574	11.732	scaffold_12	759571	760362	+
1264619	-0.444473	0.743451	3.11983	3.26912	1.82817	scaffold_1	3086099	3087863	+
1264797	3.24826	0.0163728	-4.21109	3.85408	8.83939	scaffold_5	2471584	2471742	+
1264799	-0.991645	0.494891	-4.21109	4.85408	2.82817	scaffold_13	668540	669235	-
1264819	0.037405	0.972807	-1.88916	10.6354	10.6547	scaffold_1	1239851	1240303	-
1264839	-2.31514	0.106899	-3.32193	6.26912	1.82817	scaffold_11	438365	438613	-
1264882	-0.0326752	0.976074	-2.62613	11.8256	11.7604	scaffold_9	1389922	1390356	-
1265003	0.32879	0.748945	0.646893	-3.32193	1.82817	scaffold_1	362476	362896	-
1265098	-1.62959	0.177852	-3.32193	9.31351	7.18572	scaffold_7	1367582	1367794	-
1265184	-0.474771	0.642431	2.82233	2.26912	-3.32193	scaffold_9	1411061	1411744	-
1265254	0.06	0.06	-0.751657	-3.32193	-3.32193	scaffold_14	247078	247486	+
1265271	0.584812	0.590884	-0.403733	-3.32193	10.4392	scaffold_4	2506492	2506899	-
1265318	0.06	0.06	2.93866	-3.32193	-3.32193	scaffold_2	2972587	2972991	+
1265790	0.06	0.06	-4.21109	-3.32193	-3.32193	scaffold_7	594598	594747	-
1265844	-0.474771	0.642431	1.67155	2.26912	-3.32193	scaffold_2	975685	975991	-
1265953	0.32879	0.748945	-1.62613	-3.32193	1.82817	scaffold_1	1836653	1836907	+
1266069	0.06	0.06	0.489352	-3.32193	-3.32193	scaffold_13	694109	694788	-
1266134	-0.474771	0.642431	-0.88916	2.26912	-3.32193	scaffold_4	1833845	1834009	-
1266341	-0.474771	0.642431	1.59627	2.26912	-3.32193	scaffold_9	102952	103311	-
1266342	-0.474771	0.642431	-2.62613	2.26912	-3.32193	scaffold_10	869943	870110	+
1266456	0.06	0.06	0.998365	-3.32193	-3.32193	scaffold_2	1419894	1420112	+
1266996	0.32879	0.748945	1.81128	-3.32193	1.82817	scaffold_2	2532850	2533960	-
1267123	0.32879	0.748945	3.25652	-3.32193	1.82817	scaffold_6	2423960	2424272	+
1267168	0.06	0.06	0.833306	-3.32193	-3.32193	scaffold_13	373876	374125	-
1267408	0.178514	0.894103	4.00808	2.26912	2.82817	scaffold_4	2943815	2944900	-
1267411	0.06	0.06	-2.62613	-3.32193	-3.32193	scaffold_3	4187946	4188214	+
1267424	-0.474771	0.642431	-4.21109	2.26912	-3.32193	scaffold_1	1381885	1382046	+
1267438	-2.23247	0.0656945	-3.21109	13.7838	10.8671	scaffold_4	3805612	3805965	-
1267527	0.63309	0.577421	0.695802	-3.32193	2.82817	scaffold_2	275318	275563	+
1267749	-1.12564	0.392724	-0.304198	3.85408	-3.32193	scaffold_7	2204930	2207361	+
1267951	0.06	0.06	1.67155	-3.32193	-3.32193	scaffold_10	307373	307537	-
1268094	0.178514	0.894103	4.29274	2.26912	2.82817	scaffold_3	4548629	4548949	+
1268198	0.32879	0.748945	2.78891	-3.32193	1.82817	scaffold_2	4557764	4558070	-
1268272	0.06	0.06	1.31247	-3.32193	-3.32193	scaffold_2	3796988	3797191	+
1268627	0.06	0.06	1.03684	-3.32193	-3.32193	scaffold_22	3599	3817	-
1268807	0.189768	0.889951	4.78327	5.26912	5.52861	scaffold_3	4460614	4461249	-
1268872	0.06	0.06	-2.62613	-3.32193	-3.32193	scaffold_7	1210078	1210372	-
1268910	-1.60161	0.270301	1.57027	5.26912	1.82817	scaffold_1	3595634	3596264	+
1268947	0.06	0.06	0.11084	-3.32193	-3.32193	scaffold_6	2038525	2038686	+
1269366	-0.101568	0.935242	-3.21109	2.26912	1.82817	scaffold_4	2300009	2300476	+
1269528	-0.101568	0.935242	4.00323	2.26912	1.82817	scaffold_4	1702712	1703601	+
1269677	0.06	0.06	-1.21109	-3.32193	-3.32193	scaffold_5	3343741	3344025	+
1269871	-0.386952	0.787877	4.27675	4.85408	4.15009	scaffold_1	3537544	3538287	-
1269882	0.32879	0.748945	-1.21109	-3.32193	1.82817	scaffold_4	3415395	3416064	-
1269992	0.06	0.06	1.18123	-3.32193	-3.32193	scaffold_1	1197223	1197624	-
1270302	-0.909971	0.481493	4.79454	6.91297	5.63552	scaffold_1	4598810	4601710	+
1270329	-0.15499	0.912222	2.5438	3.26912	2.82817	scaffold_1	3970559	3972986	-
1270416	-0.720252	0.608938	4.04158	3.85408	1.82817	scaffold_1	4570838	4572890	-
1270438	0.0701075	0.96092	4.6059	3.26912	3.41313	scaffold_1	3888003	3889904	-
1270439	0.220597	0.878369	5.80293	4.26912	4.63552	scaffold_1	2598032	2600265	-
1270447	0.06	0.06	2.24834	-3.32193	-3.32193	scaffold_1	8637	10360	+
1270496	0.162249	0.911088	4.87902	3.85408	4.15009	scaffold_1	3102859	3105041	-
1270557	-0.444473	0.743451	5.06271	3.26912	1.82817	scaffold_1	2639019	2640568	-
1270570	-0.15499	0.912222	4.87106	3.26912	2.82817	scaffold_1	2952346	2954843	-
1270591	0.178514	0.894103	1.5438	2.26912	2.82817	scaffold_1	4867561	4868610	+
1270592	0.178514	0.894103	5.36066	2.26912	2.82817	scaffold_1	3185981	3187585	-
1270619	0.06	0.06	0.11084	-3.32193	-3.32193	scaffold_1	734473	735459	+
1270699	0.06	0.06	1.40362	-3.32193	-3.32193	scaffold_1	3903509	3905166	+
1270719	0.06	0.06	0.958837	-3.32193	-3.32193	scaffold_1	806585	806782	-
1270721	1.08435	0.4107	2.38882	-3.32193	3.82817	scaffold_1	5288608	5292441	+
1270735	0.178514	0.894103	0.432768	2.26912	2.82817	scaffold_1	499709	500788	-
1270770	0.32879	0.748945	4.13764	-3.32193	1.82817	scaffold_1	4868908	4870838	-
1270841	0.06	0.06	-3.32193	-3.32193	-3.32193	scaffold_1	15206	15427	+
1270850	-0.15499	0.912222	5.17908	3.26912	2.82817	scaffold_1	3385056	3386238	-
1270879	1.08435	0.4107	4.37763	-3.32193	3.82817	scaffold_1	3227889	3229298	-
1270891	-0.115191	0.935568	4.47191	4.85408	4.63552	scaffold_1	3341905	3347233	-
1270892	0.598909	0.672767	3.93866	2.26912	3.82817	scaffold_1	5442286	5445664	-
1270950	-0.828781	0.496118	3.0463	3.26912	-3.32193	scaffold_1	1583705	1584923	-
1270966	0.06	0.06	0.312474	-3.32193	-3.32193	scaffold_1	3618794	3620138	-
1270969	0.06	0.06	2.14646	-3.32193	-3.32193	scaffold_1	869166	871001	-
1270999	0.06	0.06	2.93866	-3.32193	-3.32193	scaffold_1	422040	424797	-
1271014	-0.418177	0.770736	2.47541	3.85408	2.82817	scaffold_1	485795	487805	-
1271031	-0.101568	0.935242	3.73728	2.26912	1.82817	scaffold_1	2174441	2175945	-
1271075	-0.720252	0.608938	3.49627	3.85408	1.82817	scaffold_1	1722209	1723715	-
1271082	0.875562	0.48389	4.21518	-3.32193	3.41313	scaffold_1	4826030	4827007	+
1271116	-0.101568	0.935242	3.17262	2.26912	1.82817	scaffold_1	2129837	2134186	+
1271128	-0.101568	0.935242	1.46134	2.26912	1.82817	scaffold_1	727335	728412	+
1271197	0.32879	0.748945	2.14646	-3.32193	1.82817	scaffold_1	302976	304947	-
1271212	-0.101568	0.935242	3.80014	2.26912	1.82817	scaffold_1	2104247	2106651	+
1271225	0.25854	0.85789	3.73728	3.26912	3.82817	scaffold_1	2424608	2427424	+
1271262	-0.474771	0.642431	0.998365	2.26912	-3.32193	scaffold_1	1833977	1836626	+
1271269	-0.474771	0.642431	1.83331	2.26912	-3.32193	scaffold_1	2183862	2184848	-
1271302	0.32879	0.748945	-0.88916	-3.32193	1.82817	scaffold_1	1450065	1450550	+
1271356	-1.37169	0.316947	2.43277	4.26912	-3.32193	scaffold_1	3396130	3397476	+
1271360	-0.083126	0.951775	5.80711	5.43904	5.2876	scaffold_1	4615454	4619657	+
1271385	0.32879	0.748945	-2.62613	-3.32193	1.82817	scaffold_1	3559937	3561271	+
1271391	0.06	0.06	-4.21109	-3.32193	-3.32193	scaffold_1	3628585	3628896	+
1271397	-0.418177	0.770736	2.98858	3.85408	2.82817	scaffold_1	1048732	1050867	+
1271410	1.26608	0.352142	2.50316	-3.32193	4.15009	scaffold_1	2746158	2748029	+
1271419	1.08435	0.4107	4.37763	-3.32193	3.82817	scaffold_1	3243489	3245182	-
1271441	0.06	0.06	2.90785	-3.32193	-3.32193	scaffold_1	820663	821538	+
1271444	0.06	0.06	1.03684	-3.32193	-3.32193	scaffold_1	3407712	3408675	-
1271453	0.06	0.06	-4.21109	-3.32193	-3.32193	scaffold_1	3973976	3974635	+
1271466	0.178514	0.894103	2.76619	2.26912	2.82817	scaffold_1	4299507	4300036	+
1271486	-0.720252	0.608938	2.23186	3.85408	1.82817	scaffold_1	244804	245994	+
1271506	0.178514	0.894103	1.6218	2.26912	2.82817	scaffold_1	4659245	4659738	-
1271509	0.06	0.06	3.80014	-3.32193	-3.32193	scaffold_1	2651874	2653019	-
1271513	-0.083126	0.951775	6.42916	5.43904	5.2876	scaffold_1	2204852	2205870	-
1271532	0.875562	0.48389	1.76619	-3.32193	3.41313	scaffold_1	2963513	2964907	-
1271543	0.06	0.06	-3.32193	-3.32193	-3.32193	scaffold_1	633759	634439	-
1271566	0.06	0.06	1.6218	-3.32193	-3.32193	scaffold_1	5547070	5548032	+
1271574	0.178514	0.894103	3.98858	2.26912	2.82817	scaffold_1	1876797	1877418	-
1271586	0.06	0.06	0.11084	-3.32193	-3.32193	scaffold_1	433027	433760	+
1271587	-0.474771	0.642431	1.18123	2.26912	-3.32193	scaffold_1	851792	852825	-
1271676	4.53816	0.00109961	-1.21109	3.85408	12.315	scaffold_1	5534868	5535515	-
1271728	1.71949	0.234674	5.07431	2.26912	5.63552	scaffold_1	4716700	4718067	-
1271747	5.77488e-08	1	7.06678	5.85408	5.82817	scaffold_1	3285904	3288362	+
1271749	0.06	0.06	-0.0411632	-3.32193	-3.32193	scaffold_1	1285797	1287173	-
1271755	-0.243014	0.865201	4.81958	4.85408	4.41313	scaffold_1	3192159	3194337	-
1271756	1.08435	0.4107	4.236	-3.32193	3.82817	scaffold_1	2179781	2183592	-
1271796	0.32879	0.748945	2.81128	-3.32193	1.82817	scaffold_1	3617833	3618627	-
1271842	-1.12564	0.392724	4.02732	3.85408	-3.32193	scaffold_1	5005027	5008265	-
1271849	0.63309	0.577421	1.71965	-3.32193	2.82817	scaffold_1	1313441	1314601	+
1271876	0.06	0.06	-1.21109	-3.32193	-3.32193	scaffold_1	1025253	1025525	+
1271895	0.178514	0.894103	-1.04116	2.26912	2.82817	scaffold_1	202114	202617	-
1271904	0.178514	0.894103	3.99348	2.26912	2.82817	scaffold_1	4494946	4496027	+
1271917	0.875562	0.48389	3.48935	-3.32193	3.41313	scaffold_1	4921042	4921806	-
1271924	0.32879	0.748945	0.695802	-3.32193	1.82817	scaffold_1	3754826	3755215	+
1271948	0.06	0.06	-0.403733	-3.32193	-3.32193	scaffold_1	2275288	2275563	+
1271962	0.25854	0.85789	4.20676	3.26912	3.82817	scaffold_1	5349132	5351640	+
1272046	-0.15499	0.912222	4.61546	3.26912	2.82817	scaffold_1	3585478	3587043	+
1272063	0.06	0.06	0.543799	-3.32193	-3.32193	scaffold_1	187899	188748	+
1272078	-0.101568	0.935242	1.48935	2.26912	1.82817	scaffold_1	5029877	5030504	-
1272079	0.63309	0.577421	2.48935	-3.32193	2.82817	scaffold_1	3266430	3268105	+
1272087	-0.101568	0.935242	3.21518	2.26912	1.82817	scaffold_1	848405	850193	-
1272090	0.63309	0.577421	2.6958	-3.32193	2.82817	scaffold_1	4069916	4070532	-
1272091	0.32879	0.748945	1.87637	-3.32193	1.82817	scaffold_1	212713	214093	-
1272113	0.25854	0.85789	4.6218	3.26912	3.82817	scaffold_1	365548	367517	-
1272154	0.06	0.06	-1.21109	-3.32193	-3.32193	scaffold_1	5009261	5011352	-
1272190	-0.444473	0.743451	0.918195	3.26912	1.82817	scaffold_1	2632941	2633412	-
1272214	0.06	0.06	2.31247	-3.32193	-3.32193	scaffold_1	4080940	4081918	+
1272260	-0.292984	0.788504	-2.62613	12.0652	11.6861	scaffold_1	1470073	1470318	-
1272270	0.06	0.06	0.743108	-3.32193	-3.32193	scaffold_1	733216	734272	+
1272274	1.02097	0.480264	5.30264	3.26912	5.15009	scaffold_1	2779540	2786985	-
1272292	-1.31823	0.36351	2.31247	4.85408	1.82817	scaffold_1	4107412	4108722	+
1272297	0.174332	0.878543	7.17747	8.45894	8.64834	scaffold_1	4651795	4653688	+
1272308	0.32879	0.748945	1.3435	-3.32193	1.82817	scaffold_1	943144	944432	-
1272323	0.06	0.06	0.788912	-3.32193	-3.32193	scaffold_1	188788	189786	+
1272333	-0.474771	0.642431	1.74311	2.26912	-3.32193	scaffold_1	1610920	1611875	+
1272360	0.06	0.06	3.02732	-3.32193	-3.32193	scaffold_1	3096650	3098501	+
1272386	0.32879	0.748945	4.00808	-3.32193	1.82817	scaffold_1	4704518	4705106	+
1272399	0.405441	0.770526	7.39022	2.26912	3.41313	scaffold_1	5468320	5469433	+
1272409	0.06	0.06	3.37387	-3.32193	-3.32193	scaffold_1	1863450	1864049	+
1272488	-1.51041	0.286572	6.74746	5.96956	3.41313	scaffold_1	4068642	4069756	-
1272572	-0.828781	0.496118	3.46134	3.26912	-3.32193	scaffold_1	2206657	2207813	-
1272580	0.06	0.06	3.07431	-3.32193	-3.32193	scaffold_1	2755054	2755977	-
1272598	0.32879	0.748945	3.25652	-3.32193	1.82817	scaffold_1	321817	322994	-
1272616	-0.7483	0.605723	-3.32193	4.85408	3.41313	scaffold_1	985612	985806	+
1272629	0.405441	0.770526	2.89744	2.26912	3.41313	scaffold_1	1148546	1149976	-
1272639	0.63309	0.577421	3.25652	-3.32193	2.82817	scaffold_1	1603847	1606517	-
1272735	0.63309	0.577421	4.86037	-3.32193	2.82817	scaffold_1	1558590	1561475	+
1272736	-0.637949	0.659471	3.5371	4.26912	2.82817	scaffold_1	4236556	4237631	-
1272745	-1.39873	0.229945	-3.32193	10.5729	8.79395	scaffold_1	5587460	5587663	-
1272785	0.32879	0.748945	-1.21109	-3.32193	1.82817	scaffold_1	2520955	2521570	-
1272786	0.63309	0.577421	1.76619	-3.32193	2.82817	scaffold_1	1403347	1403781	+
1272804	-0.828781	0.496118	0.646893	3.26912	-3.32193	scaffold_1	1424212	1425059	-
1272823	0.0290312	0.983245	6.11197	5.26912	5.2876	scaffold_1	1177215	1182015	+
1272854	0.63309	0.577421	-3.21109	-3.32193	2.82817	scaffold_1	4733302	4734527	+
1272895	0.433145	0.764932	3.35877	3.85408	4.63552	scaffold_1	5222259	5224323	-
1272898	0.178514	0.894103	3.8922	2.26912	2.82817	scaffold_1	3739333	3741064	+
1272909	0.357537	0.800648	2.78891	4.59105	5.15009	scaffold_1	3665151	3666146	+
1272915	-1.12564	0.392724	2.26465	3.85408	-3.32193	scaffold_1	1316770	1317711	+
1272919	-0.474771	0.642431	1.3435	2.26912	-3.32193	scaffold_1	4250481	4252304	+
1272944	0.06	0.06	1.71965	-3.32193	-3.32193	scaffold_1	2291312	2292109	-
1272953	0.63309	0.577421	4.91562	-3.32193	2.82817	scaffold_1	3482688	3484198	+
1272971	0.178514	0.894103	3.93357	2.26912	2.82817	scaffold_1	2152320	2154980	-
1273017	0.32879	0.748945	3.35115	-3.32193	1.82817	scaffold_1	3430688	3431954	-
1273032	-0.101568	0.935242	4.24424	2.26912	1.82817	scaffold_1	1522737	1524509	-
1273039	-0.474771	0.642431	0.489352	2.26912	-3.32193	scaffold_1	4000253	4000926	-
1273075	-0.260801	0.811575	-2.21109	11.5545	11.214	scaffold_1	1434209	1434819	+
1273091	-1.12564	0.392724	5.94752	3.85408	-3.32193	scaffold_1	513501	514488	+
1273110	-0.0495273	0.972754	3.35115	4.26912	4.15009	scaffold_1	4010502	4012223	-
1273129	0.06	0.06	1.6218	-3.32193	-3.32193	scaffold_1	1497462	1497689	-
1273147	-1.93979	0.105893	-2.62613	11.3298	8.81685	scaffold_1	5586726	5587327	-
1273203	0.32879	0.748945	3.28076	-3.32193	1.82817	scaffold_1	664401	665280	-
1273239	0.06	0.06	1.99837	-3.32193	-3.32193	scaffold_1	5485179	5487768	+
1273271	0.32879	0.748945	1.89744	-3.32193	1.82817	scaffold_1	1384813	1385899	+
1273291	0.32879	0.748945	0.958837	-3.32193	1.82817	scaffold_1	3351098	3351376	-
1273297	0.06	0.06	1.78891	-3.32193	-3.32193	scaffold_1	2555335	2557146	-
1273304	0.06	0.06	-0.0411632	-3.32193	-3.32193	scaffold_1	799834	801639	-
1273308	0.06	0.06	-0.0411632	-3.32193	-3.32193	scaffold_1	363523	363914	-
1273374	-0.101568	0.935242	2.92846	2.26912	1.82817	scaffold_1	3651872	3653222	+
1273414	0.06	0.06	2.29671	-3.32193	-3.32193	scaffold_1	1404352	1405205	-
1273454	0.06	0.06	5.22145	-3.32193	-3.32193	scaffold_1	246010	247839	+
1273495	0.63309	0.577421	2.41827	-3.32193	2.82817	scaffold_1	2737684	2739726	-
1273498	0.32879	0.748945	1.31247	-3.32193	1.82817	scaffold_1	1530969	1532075	-
1273512	0.25854	0.85789	4.25244	3.26912	3.82817	scaffold_1	2330211	2332293	-
1273523	0.32879	0.748945	2.44712	-3.32193	1.82817	scaffold_1	309736	311819	+
1273576	3.99427	0.00332363	-2.21109	4.26912	10.6387	scaffold_1	3844806	3845395	-
1273591	0.32879	0.748945	-0.626126	-3.32193	1.82817	scaffold_1	4825732	4825920	+
1273611	0.598909	0.672767	1.64689	2.26912	3.82817	scaffold_1	2512710	2513992	+
1273690	-0.418177	0.770736	2.23186	3.85408	2.82817	scaffold_1	808992	809672	+
1273705	-0.474771	0.642431	3.70778	2.26912	-3.32193	scaffold_1	2969484	2970634	+
1273761	-0.474771	0.642431	0.646893	2.26912	-3.32193	scaffold_1	360127	361591	+
1273797	-0.444473	0.743451	2.74311	3.26912	1.82817	scaffold_1	425520	428050	-
1273896	-0.720252	0.608938	5.07893	3.85408	1.82817	scaffold_2	1095505	1099868	-
1273898	0.32879	0.748945	-0.403733	-3.32193	1.82817	scaffold_2	4109009	4110014	-
1273899	0.767871	0.592441	3.80014	2.26912	4.15009	scaffold_2	1779490	1780078	-
1273900	0.875562	0.48389	4.01773	-3.32193	3.41313	scaffold_2	1580940	1582442	+
1273926	0.06	0.06	-4.21109	-3.32193	-3.32193	scaffold_2	907631	907849	+
1273963	0.458641	0.701218	6.45158	7.22331	7.78236	scaffold_2	844144	844844	-
1273992	-0.229706	0.873664	3.65928	4.59105	4.15009	scaffold_2	3569623	3571045	-
1273997	-0.828781	0.496118	3.00808	3.26912	-3.32193	scaffold_2	3932166	3933978	+
1274020	0.405441	0.770526	3.17262	2.26912	3.41313	scaffold_2	2322821	2324069	+
1274033	0.06	0.06	1.37387	-3.32193	-3.32193	scaffold_2	541010	541279	-
1274091	-0.101568	0.935242	1.855	2.26912	1.82817	scaffold_2	3504291	3504988	-
1274115	-0.15499	0.912222	2.40362	3.26912	2.82817	scaffold_2	608576	609643	+
1274127	1.42037	0.320765	6.48153	3.26912	5.73506	scaffold_2	3696283	3698952	-
1274158	-0.355535	0.774346	-4.21109	7.07647	6.58305	scaffold_2	4277158	4277574	-
1274213	0.32879	0.748945	1.07431	-3.32193	1.82817	scaffold_2	2797772	2799025	+
1274248	0.63309	0.577421	2.57027	-3.32193	2.82817	scaffold_2	2281172	2282963	-
1274267	-1.12564	0.392724	2.91819	3.85408	-3.32193	scaffold_2	3508043	3509097	-
1274305	0.405441	0.770526	3.91303	2.26912	3.41313	scaffold_2	2760635	2761685	+
1274306	-0.474771	0.642431	1.3435	2.26912	-3.32193	scaffold_2	2019614	2019966	+
1274326	-0.444473	0.743451	3.11084	3.26912	1.82817	scaffold_2	1290416	1292972	+
1274352	0.405441	0.770526	5.10632	2.26912	3.41313	scaffold_2	2640276	2643730	+
1274363	-0.212381	0.88376	5.24834	4.26912	3.82817	scaffold_2	4167070	4169051	-
1274365	0.405441	0.770526	4.58333	2.26912	3.41313	scaffold_2	4672652	4674172	+
1274367	-0.403424	0.781224	5.43817	4.26912	3.41313	scaffold_2	4061585	4062705	-
1274377	0.06	0.06	-2.21109	-3.32193	-3.32193	scaffold_2	2726596	2727679	+
1274385	0.63309	0.577421	0.876375	-3.32193	2.82817	scaffold_2	1731811	1732548	-
1274389	-0.168147	0.897777	5.00566	6.17601	5.91563	scaffold_2	3248588	3250009	-
1274410	1.08435	0.4107	1.6958	-3.32193	3.82817	scaffold_2	3650634	3652343	-
1274434	0.06	0.06	2.14646	-3.32193	-3.32193	scaffold_2	1538219	1538911	+
1274471	0.178514	0.894103	1.855	2.26912	2.82817	scaffold_2	469288	470377	-
1274480	0.767871	0.592441	4.24834	2.26912	4.15009	scaffold_2	2090379	2092770	-
1274601	0.0931958	0.948616	5.47541	4.26912	4.41313	scaffold_2	2805057	2807942	+
1274644	-0.474771	0.642431	1.67155	2.26912	-3.32193	scaffold_2	1260315	1260976	-
1274656	-0.77162	0.552537	6.76046	6.72855	5.63552	scaffold_2	3627598	3632008	-
1274661	-0.101568	0.935242	1.81128	2.26912	1.82817	scaffold_2	420214	421188	-
1274678	-0.101568	0.935242	2.7776	2.26912	1.82817	scaffold_2	3474670	3476541	+
1274690	-0.355535	0.774346	-4.21109	7.07647	6.58305	scaffold_2	4267789	4268205	-
1274724	0.32879	0.748945	-1.62613	-3.32193	1.82817	scaffold_2	4396405	4397206	-
1274728	-0.950538	0.506991	2.47541	4.26912	1.82817	scaffold_2	4669384	4669965	+
1274748	1.38932	0.32221	6.89613	3.85408	6.07609	scaffold_2	2414894	2416852	-
1274757	1.1803	0.298324	0.596267	11.034	12.4621	scaffold_2	4879274	4880433	+
1274879	-0.474771	0.642431	1.40362	2.26912	-3.32193	scaffold_2	3673358	3674403	+
1274899	-0.474771	0.642431	4.57355	2.26912	-3.32193	scaffold_2	2100881	2102142	+
1274902	0.63309	0.577421	3.37387	-3.32193	2.82817	scaffold_2	1117470	1119954	+
1274905	-0.474771	0.642431	5.04866	2.26912	-3.32193	scaffold_2	1991608	1992441	-
1274991	0.32879	0.748945	1.59627	-3.32193	1.82817	scaffold_2	3059408	3059956	+
1275002	0.06	0.06	-0.510648	-3.32193	-3.32193	scaffold_2	2432577	2433299	-
1275030	0.32879	0.748945	2.3435	-3.32193	1.82817	scaffold_2	1146404	1147807	+
1275041	-0.393788	0.785857	2.38882	4.59105	3.82817	scaffold_2	3216533	3217999	-
1275104	-0.243014	0.865201	3.97379	4.85408	4.41313	scaffold_2	4744382	4745098	-
1275131	0.06	0.06	1.76619	-3.32193	-3.32193	scaffold_2	4152087	4154780	-
1275144	-0.950538	0.506991	3.88694	4.26912	1.82817	scaffold_2	2966849	2967921	-
1275147	1.33829	0.245097	-3.32193	9.84655	11.4846	scaffold_2	2167345	2168547	+
1275154	0.06	0.06	1.14646	-3.32193	-3.32193	scaffold_2	2484911	2485476	+
1275164	0.261004	0.854326	4.82233	4.59105	4.99809	scaffold_2	3744528	3748543	-
1275180	-0.720252	0.608938	4.24834	3.85408	1.82817	scaffold_2	568538	572199	-
1275187	0.63309	0.577421	2.91819	-3.32193	2.82817	scaffold_2	4052003	4052365	-
1275223	-0.828781	0.496118	0.695802	3.26912	-3.32193	scaffold_2	1460958	1461859	-
1275226	0.32879	0.748945	4.7226	-3.32193	1.82817	scaffold_2	1328075	1329539	-
1275240	-0.101568	0.935242	1.31247	2.26912	1.82817	scaffold_2	1715914	1717779	-
1275246	0.178514	0.894103	5.04158	2.26912	2.82817	scaffold_2	1284249	1285361	-
1275247	1.08435	0.4107	1.78891	-3.32193	3.82817	scaffold_2	3381322	3383031	-
1275267	0.06	0.06	3.11983	-3.32193	-3.32193	scaffold_2	3469625	3469948	-
1275295	-0.18886	0.896173	5.6807	3.85408	3.41313	scaffold_2	1348359	1352678	+
1275347	-0.301898	0.781629	-3.21109	13.1947	12.8054	scaffold_2	932249	932659	-
1275356	0.875562	0.48389	1.5438	-3.32193	3.41313	scaffold_2	3580775	3581881	-
1275387	-0.474771	0.642431	3.59627	2.26912	-3.32193	scaffold_2	2705881	2706823	+
1275406	0.177167	0.876223	6.96259	8.55452	8.74703	scaffold_2	4449046	4449810	+
1275440	-0.15499	0.912222	4.53375	3.26912	2.82817	scaffold_2	564499	568093	-
1275474	-0.474771	0.642431	1.67155	2.26912	-3.32193	scaffold_2	4864874	4865122	+
1275477	0.63309	0.577421	3.29671	-3.32193	2.82817	scaffold_2	211032	212086	-
1275489	0.313404	0.820388	4.62496	5.07647	5.52861	scaffold_2	718024	718569	+
1275492	0.598909	0.672767	2.5438	2.26912	3.82817	scaffold_2	1122124	1125763	-
1275536	0.06	0.06	0.596267	-3.32193	-3.32193	scaffold_2	13705	14084	-
1275576	0.32879	0.748945	1.97874	-3.32193	1.82817	scaffold_2	4335995	4337779	+
1275595	1.08435	0.4107	1.03684	-3.32193	3.82817	scaffold_2	2915446	2917075	-
1275608	-1.33574	0.251454	-3.21109	10.2691	8.56963	scaffold_2	328075	328380	+
1275622	-0.828781	0.496118	4.10179	3.26912	-3.32193	scaffold_2	2627186	2627966	-
1275648	-0.474771	0.642431	4.20676	2.26912	-3.32193	scaffold_2	4307374	4308363	+
1275649	0.405441	0.770526	2.48935	2.26912	3.41313	scaffold_2	3511811	3513252	-
1275655	0.32879	0.748945	1.64689	-3.32193	1.82817	scaffold_2	4468596	4469331	-
1275661	-0.444473	0.743451	2.73143	3.26912	1.82817	scaffold_2	2033848	2034816	-
1275737	-1.3425	0.314941	-3.21109	6.79268	4.82817	scaffold_2	4431326	4431562	-
1275756	0.06	0.06	-0.88916	-3.32193	-3.32193	scaffold_2	4086244	4087917	-
1275774	0.06	0.06	2.58333	-3.32193	-3.32193	scaffold_2	3155669	3159096	+
1275801	-0.474771	0.642431	0.833306	2.26912	-3.32193	scaffold_2	4338273	4338869	+
1275822	0.25854	0.85789	4.06504	3.26912	3.82817	scaffold_2	3211464	3212328	+
1275823	1.08435	0.4107	4.21936	-3.32193	3.82817	scaffold_2	4665207	4667603	-
1275856	0.06	0.06	-0.88916	-3.32193	-3.32193	scaffold_2	3046024	3047815	+
1275892	0.06	0.06	-0.211088	-3.32193	-3.32193	scaffold_2	1516194	1517716	+
1275907	0.152578	0.893258	7.25039	8.5729	8.73506	scaffold_2	551524	552288	-
1275912	-0.101568	0.935242	1.81128	2.26912	1.82817	scaffold_2	3082378	3083099	-
1275964	-0.536113	0.633758	-3.32193	9.72033	9.03762	scaffold_2	2467632	2468530	+
1275979	0.32879	0.748945	1.76619	-3.32193	1.82817	scaffold_2	3076491	3077461	+
1276004	0.63309	0.577421	1.95884	-3.32193	2.82817	scaffold_2	2624792	2625807	-
1276008	0.63309	0.577421	2.6958	-3.32193	2.82817	scaffold_2	3006362	3007565	-
1276070	-0.474771	0.642431	2.35877	2.26912	-3.32193	scaffold_2	4163954	4164942	-
1276084	0.26572	0.807012	-0.0411632	13.2065	13.5001	scaffold_2	2041077	2041868	+
1276162	0.0701075	0.96092	3.60269	3.26912	3.41313	scaffold_2	1582576	1585659	+
1276163	0.63309	0.577421	-0.751657	-3.32193	2.82817	scaffold_2	1023008	1024150	+
1276178	-0.619757	0.660175	5.78468	5.43904	4.41313	scaffold_2	3836808	3839731	-
1276233	0.06	0.06	-2.21109	-3.32193	-3.32193	scaffold_2	4255061	4255863	-
1276246	-0.474771	0.642431	3.11084	2.26912	-3.32193	scaffold_2	998237	999296	+
1276263	0.220597	0.878369	5.11534	4.26912	4.63552	scaffold_2	4096685	4102855	-
1276306	-0.444473	0.743451	1.67155	3.26912	1.82817	scaffold_2	4585478	4586473	-
1276323	0.06	0.06	-1.40373	-3.32193	-3.32193	scaffold_2	4653374	4654537	+
1276406	-0.0238053	0.984125	5.89874	7.43904	7.38275	scaffold_2	4247645	4249062	-
1276427	-0.143678	0.902408	6.41188	7.94154	7.73506	scaffold_2	2122709	2123405	+
1276444	0.32879	0.748945	2.09269	-3.32193	1.82817	scaffold_2	2017784	2019381	+
1276504	-0.720252	0.608938	-0.0411632	3.85408	1.82817	scaffold_2	1739979	1740260	-
1276521	-0.474771	0.642431	-3.32193	2.26912	-3.32193	scaffold_2	4865171	4865618	-
1276535	0.63309	0.577421	6.34254	-3.32193	2.82817	scaffold_2	1798696	1799631	+
1276604	0.405441	0.770526	3.08353	2.26912	3.41313	scaffold_2	2742554	2744278	-
1276636	0.680887	0.625727	4.9259	4.59105	5.63552	scaffold_2	3809006	3811868	-
1276651	0.06	0.06	-0.626126	-3.32193	-3.32193	scaffold_2	306736	307129	+
1276674	0.32879	0.748945	3.12876	-3.32193	1.82817	scaffold_2	3096598	3100222	-
1276749	0.06	0.06	2.1983	-3.32193	-3.32193	scaffold_2	1629586	1630416	-
1276755	-0.101568	0.935242	1.59627	2.26912	1.82817	scaffold_2	1538943	1539560	-
1276805	0.0931958	0.948616	5.12876	4.26912	4.41313	scaffold_2	3126922	3129272	-
1276881	0.0701075	0.96092	1.74311	3.26912	3.41313	scaffold_2	262544	264313	+
1276885	0.763586	0.492979	-2.21109	10.591	11.4953	scaffold_2	3090346	3090936	+
1276934	0.178514	0.894103	1.78891	2.26912	2.82817	scaffold_2	367247	368738	-
1276945	-0.101568	0.935242	1.31247	2.26912	1.82817	scaffold_2	2394989	2396006	-
1276963	-0.119311	0.929538	4.55046	5.72855	5.52861	scaffold_2	3133514	3133711	+
1276995	0.25854	0.85789	4.79454	3.26912	3.82817	scaffold_3	1042924	1046109	+
1277008	0.63309	0.577421	1.91819	-3.32193	2.82817	scaffold_3	1573756	1576513	-
1277050	0.06	0.06	-0.88916	-3.32193	-3.32193	scaffold_3	3655098	3655612	-
1277095	0.06	0.06	4.89744	-3.32193	-3.32193	scaffold_3	1284696	1287245	+
1277106	0.06	0.06	-4.21109	-3.32193	-3.32193	scaffold_3	70170	70625	+
1277118	-0.444473	0.743451	3.46839	3.26912	1.82817	scaffold_3	2579279	2581171	+
1277127	0.112108	0.935102	4.5371	5.26912	5.41313	scaffold_3	2751901	2757782	+
1277133	-0.101568	0.935242	2.14646	2.26912	1.82817	scaffold_3	2409604	2410425	-
1277167	0.178514	0.894103	2.43277	2.26912	2.82817	scaffold_3	3060927	3063498	-
1277177	0.63309	0.577421	2.73143	-3.32193	2.82817	scaffold_3	3000753	3002296	+
1277268	-0.0445267	0.970151	5.34542	7.55452	7.47202	scaffold_3	2523205	2523950	-
1277286	0.06	0.06	-1.04116	-3.32193	-3.32193	scaffold_3	2383340	2384257	+
1277311	0.32879	0.748945	-1.62613	-3.32193	1.82817	scaffold_3	3097050	3098044	+
1277323	-0.828781	0.496118	1.76619	3.26912	-3.32193	scaffold_3	1630651	1631730	+
1277353	-0.109438	0.933161	4.81128	6.17601	5.99809	scaffold_3	244253	246744	-
1277358	0.06	0.06	0.181229	-3.32193	-3.32193	scaffold_3	4099833	4100310	+
1277427	0.875562	0.48389	1.3435	-3.32193	3.41313	scaffold_3	3261104	3262486	+
1277437	-0.826751	0.569208	4.93866	4.59105	2.82817	scaffold_3	2229980	2232346	+
1277457	0.0701075	0.96092	4.12876	3.26912	3.41313	scaffold_3	1742603	1744253	+
1277461	-0.474771	0.642431	2.59627	2.26912	-3.32193	scaffold_3	3761321	3762514	+
1277463	0.06	0.06	2.03684	-3.32193	-3.32193	scaffold_3	1098919	1100622	-
1277479	4.20766	0.002108	-1.88916	4.26912	11.1989	scaffold_3	1106689	1106970	-
1277529	-0.444473	0.743451	4.11534	3.26912	1.82817	scaffold_3	433539	435313	-
1277561	0.335819	0.815152	5.32224	4.26912	4.82817	scaffold_3	4092851	4094185	-
1277684	0.06	0.06	1.67155	-3.32193	-3.32193	scaffold_3	2583307	2584245	-
1277691	0.598909	0.672767	4.44712	2.26912	3.82817	scaffold_3	2698319	2701229	-
1277695	0.530079	0.706051	5.236	4.59105	5.41313	scaffold_3	1252924	1254259	-
1277700	0.06	0.06	-0.510648	-3.32193	-3.32193	scaffold_3	357781	358878	+
1277706	0.06	0.06	0.695802	-3.32193	-3.32193	scaffold_3	4414420	4415053	-
1277707	0.32879	0.748945	3.14646	-3.32193	1.82817	scaffold_3	1848352	1850332	-
1277778	-0.587356	0.685939	4.16829	4.59105	3.41313	scaffold_3	1150079	1153810	-
1277831	0.63309	0.577421	3.08353	-3.32193	2.82817	scaffold_3	3076042	3078211	-
1277839	0.06	0.06	1.40362	-3.32193	-3.32193	scaffold_3	550390	552398	-
1277847	-0.593822	0.670324	5.09497	5.59105	4.63552	scaffold_3	3606058	3607525	-
1277897	-0.229706	0.873664	3.48935	4.59105	4.15009	scaffold_3	3253257	3257608	-
1277920	0.06	0.06	-2.62613	-3.32193	-3.32193	scaffold_3	3768513	3768815	+
1277926	-0.280312	0.836773	6.73289	5.72855	5.2876	scaffold_3	1076823	1079401	-
1277957	0.32879	0.748945	-0.510648	-3.32193	1.82817	scaffold_3	2930188	2930385	+
1277967	-0.418177	0.770736	3.6958	3.85408	2.82817	scaffold_3	1562674	1564245	-
1277981	0.63309	0.577421	3.94373	-3.32193	2.82817	scaffold_3	1146515	1147879	-
1277998	-0.474771	0.642431	1.11084	2.26912	-3.32193	scaffold_3	2701409	2701911	-
1278003	-0.15499	0.912222	5.49282	3.26912	2.82817	scaffold_3	1154843	1156855	+
1278017	0.178514	0.894103	2.7776	2.26912	2.82817	scaffold_3	4053964	4055867	+
1278040	-0.828781	0.496118	3.60269	3.26912	-3.32193	scaffold_3	1897820	1898180	+
1278074	0.06	0.06	2.57027	-3.32193	-3.32193	scaffold_3	3175997	3176578	+
1278119	-0.101568	0.935242	-2.62613	2.26912	1.82817	scaffold_3	2636905	2638533	-
1278130	0.875562	0.48389	3.10179	-3.32193	3.41313	scaffold_3	3610510	3611427	-
1278152	-0.474771	0.642431	0.543799	2.26912	-3.32193	scaffold_3	2188579	2189342	+
1278184	-0.444473	0.743451	2.65928	3.26912	1.82817	scaffold_3	1197592	1199911	-
1278187	-0.069528	0.956127	6.54714	6.59105	6.47202	scaffold_3	1508063	1509706	-
1278196	0.32879	0.748945	3.14646	-3.32193	1.82817	scaffold_3	3311723	3313756	+
1278201	-0.474771	0.642431	1.03684	2.26912	-3.32193	scaffold_3	3997502	3999094	-
1278229	0.32879	0.748945	3.84419	-3.32193	1.82817	scaffold_3	2939678	2940459	+
1278234	0.25854	0.85789	2.3435	3.26912	3.82817	scaffold_3	4378339	4379625	+
1278281	0.06	0.06	0.695802	-3.32193	-3.32193	scaffold_3	1862231	1862530	+
1278295	0.405441	0.770526	4.07431	2.26912	3.41313	scaffold_3	2069351	2071944	+
1278373	0.06	0.06	-1.40373	-3.32193	-3.32193	scaffold_3	850634	851763	-
1278375	0.405441	0.770526	3.06504	2.26912	3.41313	scaffold_3	559112	560757	-
1278397	0.446902	0.751374	5.6988	4.59105	5.2876	scaffold_3	3032357	3034043	-
1278448	0.162249	0.911088	3.03684	3.85408	4.15009	scaffold_3	4547483	4548430	+
1278466	0.06	0.06	-0.304198	-3.32193	-3.32193	scaffold_3	3459442	3459862	+
1278467	0.32879	0.748945	0.596267	-3.32193	1.82817	scaffold_3	3743673	3744344	+
1278536	0.32879	0.748945	0.788912	-3.32193	1.82817	scaffold_3	2426254	2426532	+
1278538	0.178514	0.894103	2.28076	2.26912	2.82817	scaffold_3	4592047	4592708	+
1278540	0.0409705	0.977196	4.71669	4.59105	4.63552	scaffold_3	137648	139402	+
1278547	0.104958	0.94075	3.87106	4.85408	4.99809	scaffold_3	2934085	2935674	+
1278574	-0.119311	0.929538	5.79032	5.72855	5.52861	scaffold_3	975718	977865	-
1278575	0.32879	0.748945	3.30461	-3.32193	1.82817	scaffold_3	3497462	3498103	-
1278586	-0.720252	0.608938	3.41827	3.85408	1.82817	scaffold_3	1485586	1486973	+
1278593	7.49854e-08	1	4.33966	3.85408	3.82817	scaffold_3	4601518	4603067	+
1278618	0.06	0.06	4.16829	-3.32193	-3.32193	scaffold_3	1764263	1765762	-
1278627	0.814409	0.57473	5.20465	3.26912	4.82817	scaffold_3	3901265	3902121	-
1278640	0.63309	0.577421	5.96134	-3.32193	2.82817	scaffold_3	1749008	1750389	-
1278641	-0.212381	0.88376	4.4824	4.26912	3.82817	scaffold_3	1925901	1929424	+
1278647	-0.393788	0.785857	3.31247	4.59105	3.82817	scaffold_3	4110294	4113083	-
1278651	-0.474771	0.642431	2.76619	2.26912	-3.32193	scaffold_3	1334415	1336186	-
1278654	0.32879	0.748945	0.743108	-3.32193	1.82817	scaffold_3	4546976	4547275	+
1278662	0.598909	0.672767	2.71965	2.26912	3.82817	scaffold_3	2764201	2765256	-
1278668	0.32879	0.748945	0.958837	-3.32193	1.82817	scaffold_3	2228789	2229056	+
1278701	-0.101568	0.935242	1.67155	2.26912	1.82817	scaffold_3	1713695	1714419	-
1278811	-0.474771	0.642431	4.46839	2.26912	-3.32193	scaffold_3	2318677	2320205	+
1278880	-0.101568	0.935242	1.67155	2.26912	1.82817	scaffold_3	1573140	1573618	+
1278927	1.42037	0.320765	5.44534	3.26912	5.73506	scaffold_3	4399993	4401612	-
1278982	0.25854	0.85789	1.83331	3.26912	3.82817	scaffold_3	3409834	3411823	-
1278997	-0.828781	0.496118	1.11084	3.26912	-3.32193	scaffold_3	1952111	1952776	+
1279003	-0.891251	0.537503	0.918195	5.07647	3.41313	scaffold_3	2227276	2227752	-
1279042	-0.474771	0.642431	0.958837	2.26912	-3.32193	scaffold_3	4188242	4189088	+
1279046	0.63309	0.577421	-4.21109	-3.32193	2.82817	scaffold_3	284598	285940	-
1279087	-0.474771	0.642431	4.54046	2.26912	-3.32193	scaffold_3	1444826	1445892	-
1279173	0.06	0.06	0.646893	-3.32193	-3.32193	scaffold_3	2438913	2439256	-
1279251	0.162249	0.911088	5.32613	3.85408	4.15009	scaffold_3	2182709	2185400	-
1279318	0.06	0.06	0.596267	-3.32193	-3.32193	scaffold_3	4258865	4259135	+
1279347	0.656906	0.55126	-1.21109	12.0877	12.8575	scaffold_3	2301868	2302761	-
1279383	0.178514	0.894103	3.0557	2.26912	2.82817	scaffold_3	2554043	2556908	+
1279402	1.26608	0.352142	5.22978	-3.32193	4.15009	scaffold_3	1744416	1747550	-
1279406	0.25854	0.85789	2.59627	3.26912	3.82817	scaffold_3	3422074	3423815	+
1279429	-0.101568	0.935242	-2.21109	2.26912	1.82817	scaffold_3	1754510	1754963	-
1279438	0.32879	0.748945	0.788912	-3.32193	1.82817	scaffold_3	2675864	2678303	-
1279450	0.446902	0.751374	5.31443	4.59105	5.2876	scaffold_3	3673434	3674951	+
1279458	0.06	0.06	2.78891	-3.32193	-3.32193	scaffold_3	3069428	3070734	-
1279461	0.598909	0.672767	3.93357	2.26912	3.82817	scaffold_3	4285556	4287657	+
1279468	-0.444473	0.743451	3.16395	3.26912	1.82817	scaffold_3	3020566	3023824	-
1279472	0.06	0.06	1.3435	-3.32193	-3.32193	scaffold_3	133680	135092	+
1279479	-0.720252	0.608938	0.432768	3.85408	1.82817	scaffold_3	3424081	3424743	+
1279514	0.06	0.06	-1.88916	-3.32193	-3.32193	scaffold_3	2015681	2015881	-
1279517	1.26608	0.352142	2.57027	-3.32193	4.15009	scaffold_3	50092	51202	+
1279525	0.63309	0.577421	5.86706	-3.32193	2.82817	scaffold_3	1634305	1634697	-
1279530	0.06	0.06	2.31247	-3.32193	-3.32193	scaffold_3	3866592	3867642	-
1279536	0.06	0.06	2.59627	-3.32193	-3.32193	scaffold_3	2576885	2578014	-
1279549	0.178514	0.894103	3.94373	2.26912	2.82817	scaffold_3	218748	221602	+
1279563	-0.223123	0.866008	6.26059	6.07647	5.73506	scaffold_3	4458940	4460460	-
1279569	-0.418177	0.770736	3.31247	3.85408	2.82817	scaffold_3	2140158	2143966	+
1279636	0.06	0.06	2.68373	-3.32193	-3.32193	scaffold_3	3717754	3718360	+
1279690	7.49854e-08	1	4.91819	3.85408	3.82817	scaffold_3	857807	859176	-
1279694	-1.0541	0.451731	4.50659	5.85408	4.15009	scaffold_3	2314124	2315977	-
1279700	0.32879	0.748945	1.21518	-3.32193	1.82817	scaffold_3	4603164	4603657	-
1279741	0.201417	0.886099	4.88957	4.85408	5.15009	scaffold_3	3114978	3117983	-
1279771	0.405441	0.770526	4.57355	2.26912	3.41313	scaffold_3	4260146	4262542	+
1279774	-0.444473	0.743451	2.78891	3.26912	1.82817	scaffold_3	1010113	1011257	-
1279781	-0.950538	0.506991	4.30461	4.26912	1.82817	scaffold_3	908989	910619	+
1279787	0.178514	0.894103	3.58981	2.26912	2.82817	scaffold_3	1891493	1895028	+
1279813	0.06	0.06	1.14646	-3.32193	-3.32193	scaffold_3	495048	495743	+
1279815	0.178514	0.894103	4.06968	2.26912	2.82817	scaffold_3	2249041	2252685	-
1279824	-0.229706	0.873664	4.6988	4.59105	4.15009	scaffold_3	335635	337063	-
1279849	-0.828781	0.496118	4.29274	3.26912	-3.32193	scaffold_3	4228725	4230196	+
1279894	-0.552382	0.702134	2.7547	4.85408	3.82817	scaffold_3	3763992	3764606	+
1279908	0.290676	0.835573	4.42191	4.85408	5.2876	scaffold_3	3337362	3338440	+
1279915	0.598909	0.672767	4.1243	2.26912	3.82817	scaffold_3	3051027	3051855	-
1279926	-0.0864974	0.952073	4.13764	4.59105	4.41313	scaffold_3	1636898	1639800	+
1279979	0.178514	0.894103	-0.510648	2.26912	2.82817	scaffold_4	4381975	4383791	+
1279980	-0.474771	0.642431	1.18123	2.26912	-3.32193	scaffold_4	3388951	3389397	-
1279993	-0.101568	0.935242	4.236	2.26912	1.82817	scaffold_4	3963472	3965509	-
1280001	0.06	0.06	-3.32193	-3.32193	-3.32193	scaffold_4	2924112	2924804	+
1280018	0.235761	0.864885	3.31247	5.07647	5.41313	scaffold_4	2592148	2593757	+
1280029	-0.444473	0.743451	2.6218	3.26912	1.82817	scaffold_4	3995988	3997603	+
1280093	0.32879	0.748945	1.14646	-3.32193	1.82817	scaffold_4	2066359	2067176	-
1280128	-0.15499	0.912222	3.17262	3.26912	2.82817	scaffold_4	252321	253655	+
1280130	0.06	0.06	1.87637	-3.32193	-3.32193	scaffold_4	2255580	2256193	-
1280132	-0.418177	0.770736	4.34733	3.85408	2.82817	scaffold_4	1175062	1176318	+
1280142	0.178514	0.894103	3.80014	2.26912	2.82817	scaffold_4	2606107	2608265	-
1280183	-0.101568	0.935242	-0.123625	2.26912	1.82817	scaffold_4	1026159	1027718	+
1280248	0.63309	0.577421	1.78891	-3.32193	2.82817	scaffold_4	4494342	4495691	-
1280260	-0.15499	0.912222	4.07431	3.26912	2.82817	scaffold_4	1700567	1701699	-
1280312	0.32879	0.748945	0.596267	-3.32193	1.82817	scaffold_4	3945586	3946436	+
1280343	0.32879	0.748945	2.37387	-3.32193	1.82817	scaffold_4	3946478	3947562	-
1280366	-0.15499	0.912222	3.7547	3.26912	2.82817	scaffold_4	3479595	3481913	+
1280410	0.06	0.06	-3.32193	-3.32193	-3.32193	scaffold_4	3529605	3530030	+
1280420	-0.0463022	0.972521	3.61546	5.72855	5.63552	scaffold_4	3834629	3835741	+
1280434	-0.0248247	0.985394	6.47454	5.59105	5.52861	scaffold_4	435268	438842	+
1280462	0.875562	0.48389	0.998365	-3.32193	3.41313	scaffold_4	994231	994571	-
1280471	-0.474771	0.642431	2.40362	2.26912	-3.32193	scaffold_4	1901804	1904130	+
1280572	0.06	0.06	1.28076	-3.32193	-3.32193	scaffold_4	3909669	3910458	-
1280573	-0.15499	0.912222	2.7547	3.26912	2.82817	scaffold_4	3504897	3506966	-
1280601	0.598909	0.672767	4.37763	2.26912	3.82817	scaffold_4	89903	92207	+
1280614	-0.791228	0.522787	4.40362	7.47857	6.41313	scaffold_4	1230969	1231550	-
1280696	-0.125664	0.911518	-4.21109	8.92733	8.74703	scaffold_4	703169	703477	+
1280710	0.06	0.06	1.28076	-3.32193	-3.32193	scaffold_4	2594823	2595470	+
1280727	0.32879	0.748945	2.40362	-3.32193	1.82817	scaffold_4	3310562	3315352	-
1280731	0.63309	0.577421	2.76619	-3.32193	2.82817	scaffold_4	690139	690738	+
1280732	0.875562	0.48389	2.58333	-3.32193	3.41313	scaffold_4	3046449	3049390	-
1280749	0.06	0.06	-3.32193	-3.32193	-3.32193	scaffold_4	4326495	4327133	-
1280755	0.06	0.06	-0.304198	-3.32193	-3.32193	scaffold_4	4101285	4103123	-
1280760	1.26608	0.352142	3.59627	-3.32193	4.15009	scaffold_4	238631	239492	+
1280774	0.178514	0.894103	5.49282	2.26912	2.82817	scaffold_4	4065197	4068177	-
1280776	-0.720252	0.608938	3.91819	3.85408	1.82817	scaffold_4	4078433	4081670	+
1280807	0.63309	0.577421	4.21518	-3.32193	2.82817	scaffold_4	4225395	4226564	+
1280811	0.06	0.06	-1.40373	-3.32193	-3.32193	scaffold_4	2264966	2265493	+
1280819	0.220597	0.878369	0.998365	4.26912	4.63552	scaffold_4	511252	511951	+
1280822	-1.12564	0.392724	4.21098	3.85408	-3.32193	scaffold_4	1106202	1108003	+
1280870	0.0701075	0.96092	3.5438	3.26912	3.41313	scaffold_4	1751193	1753205	-
1280874	-0.444473	0.743451	4.19405	3.26912	1.82817	scaffold_4	2254051	2255222	+
1280883	-0.474771	0.642431	3.5571	2.26912	-3.32193	scaffold_4	4340635	4343223	+
1280884	-0.444473	0.743451	4.13764	3.26912	1.82817	scaffold_4	4210262	4212693	+
1280907	0.0701075	0.96092	2.74311	3.26912	3.41313	scaffold_4	1035698	1037256	+
1280963	0.0551853	0.963194	0.918195	7.3984	7.44288	scaffold_4	3586643	3588152	+
1281092	-0.101568	0.935242	4.8922	2.26912	1.82817	scaffold_4	1091703	1094298	-
1281205	-0.934529	0.512445	-3.21109	5.43904	3.82817	scaffold_4	3654052	3654768	+
1281272	0.421972	0.771084	3.67155	3.26912	4.15009	scaffold_4	158699	159773	+
1281274	0.06	0.06	1.21518	-3.32193	-3.32193	scaffold_4	2158132	2159695	-
1281275	0.32879	0.748945	-3.32193	-3.32193	1.82817	scaffold_4	2307013	2307738	-
1281287	0.25854	0.85789	4.24834	3.26912	3.82817	scaffold_4	767762	770864	-
1281450	1.28623	0.262693	-3.32193	9.82371	11.3942	scaffold_4	628520	629722	-
1281480	0.06	0.06	-1.88916	-3.32193	-3.32193	scaffold_4	2668730	2669101	-
1281488	0.0718191	0.95603	5.12207	6.07647	6.15009	scaffold_4	237964	238353	+
1281557	-0.374648	0.788145	6.08583	5.43904	4.82817	scaffold_4	1630708	1637381	+
1281664	-0.444473	0.743451	3.31247	3.26912	1.82817	scaffold_4	3293890	3294817	+
1281673	1.86823	0.119393	-1.40373	8.41887	10.7882	scaffold_4	1804011	1804238	+
1281698	7.49854e-08	1	5.16612	3.85408	3.82817	scaffold_4	962450	966556	-
1281703	-0.474771	0.642431	1.6218	2.26912	-3.32193	scaffold_4	3017165	3018328	+
1281708	0.06	0.06	-1.88916	-3.32193	-3.32193	scaffold_4	922024	922254	+
1281728	0.06	0.06	0.0368393	-3.32193	-3.32193	scaffold_4	4390194	4390686	-
1281764	-1.14736	0.42715	3.51001	4.59105	1.82817	scaffold_4	4408161	4411551	+
1281798	0.32879	0.748945	3.22354	-3.32193	1.82817	scaffold_4	4298367	4300210	-
1281802	-0.101568	0.935242	0.998365	2.26912	1.82817	scaffold_4	344930	345969	+
1281841	1.26608	0.352142	5.98244	-3.32193	4.15009	scaffold_4	984069	987452	-
1281842	2.74121	0.0589174	-3.32193	-3.32193	6.35173	scaffold_4	2504096	2504518	+
1281879	0.32879	0.748945	-1.62613	-3.32193	1.82817	scaffold_4	1032049	1032674	-
1281880	0.06	0.06	-1.88916	-3.32193	-3.32193	scaffold_4	417116	417820	+
1281907	-0.474771	0.642431	0.646893	2.26912	-3.32193	scaffold_4	156360	158006	+
1281931	0.06	0.06	-3.32193	-3.32193	-3.32193	scaffold_4	757711	759150	-
1281942	4.54124	0.00101839	0.248343	5.26912	13.2922	scaffold_4	905878	906171	+
1281954	0.06	0.06	2.48935	-3.32193	-3.32193	scaffold_4	120309	121815	+
1281977	0.598909	0.672767	4.37011	2.26912	3.82817	scaffold_4	311441	313354	-
1281982	-0.444473	0.743451	1.99837	3.26912	1.82817	scaffold_4	713203	714302	+
1281996	-0.720252	0.608938	1.31247	3.85408	1.82817	scaffold_4	2080255	2080765	+
1282012	0.680887	0.625727	5.80711	4.59105	5.63552	scaffold_4	2941458	2943781	-
1282016	1.08435	0.4107	3.01773	-3.32193	3.82817	scaffold_4	3251591	3254252	+
1282071	0.06	0.06	-0.751657	-3.32193	-3.32193	scaffold_4	3927989	3929318	+
1282091	0.32879	0.748945	0.646893	-3.32193	1.82817	scaffold_4	1318216	1318945	-
1282097	0.345943	0.797066	6.67613	5.43904	5.91563	scaffold_4	4220654	4223468	+
1282197	-1.60161	0.270301	-1.62613	5.26912	1.82817	scaffold_4	254353	254556	+
1282231	-0.0495273	0.972754	5.06037	4.26912	4.15009	scaffold_4	2256209	2263368	-
1282232	0.178514	0.894103	1.78891	2.26912	2.82817	scaffold_4	4142267	4143253	+
1282240	-0.0330454	0.981211	4.09269	5.07647	4.99809	scaffold_4	3790492	3791136	-
1282243	0.405441	0.770526	2.6958	2.26912	3.41313	scaffold_4	4062707	4063991	+
1282252	0.598909	0.672767	3.03684	2.26912	3.82817	scaffold_4	4492095	4493916	+
1282253	-0.444473	0.743451	2.44712	3.26912	1.82817	scaffold_4	2427818	2428676	+
1282260	-0.18886	0.896173	2.98858	3.85408	3.41313	scaffold_4	2922212	2922400	-
1282268	0.32879	0.748945	-0.211088	-3.32193	1.82817	scaffold_4	433865	435065	+
1282282	0.104611	0.934586	5.91174	6.35658	6.47202	scaffold_4	470912	482792	-
1282340	0.405441	0.770526	4.01773	2.26912	3.41313	scaffold_4	3122845	3125225	-
1282398	-0.474771	0.642431	1.81128	2.26912	-3.32193	scaffold_4	1574036	1574735	-
1282421	0.875562	0.48389	2.44712	-3.32193	3.41313	scaffold_4	1637399	1638551	+
1282426	0.680887	0.625727	5.23186	4.59105	5.63552	scaffold_4	1723548	1727424	+
1282501	0.06	0.06	0.181229	-3.32193	-3.32193	scaffold_4	3627365	3628348	-
1282559	-0.693222	0.629893	3.62812	5.07647	3.82817	scaffold_4	104980	107377	+
1282562	0.63309	0.577421	-0.751657	-3.32193	2.82817	scaffold_4	2798452	2799447	-
1282572	-0.101568	0.935242	2.3435	2.26912	1.82817	scaffold_4	2056366	2056857	-
1282597	-0.418177	0.770736	2.03684	3.85408	2.82817	scaffold_4	894912	896028	+
1282647	0.0701075	0.96092	2.94878	3.26912	3.41313	scaffold_4	977245	978428	+
1282659	0.06	0.06	-3.21109	-3.32193	-3.32193	scaffold_4	3147780	3149652	-
1282693	-0.720252	0.608938	1.91819	3.85408	1.82817	scaffold_4	1813156	1814692	+
1282695	0.06	0.06	-0.304198	-3.32193	-3.32193	scaffold_4	4505281	4507182	+
1282708	0.566673	0.696489	4.40362	3.26912	4.41313	scaffold_4	1970204	1971523	+
1282711	-0.720252	0.608938	2.59627	3.85408	1.82817	scaffold_4	355388	355813	-
1282746	0.06	0.06	-4.21109	-3.32193	-3.32193	scaffold_4	1793514	1794134	-
1282807	0.06	0.06	2.81128	-3.32193	-3.32193	scaffold_5	3079558	3080293	-
1282811	0.06	0.06	6.03446	-3.32193	-3.32193	scaffold_5	2461579	2463341	-
1282841	0.598909	0.672767	-1.21109	2.26912	3.82817	scaffold_5	1468841	1470634	+
1282849	-0.101568	0.935242	3.32807	2.26912	1.82817	scaffold_5	854978	856922	-
1282855	-0.156883	0.91045	3.64689	5.26912	4.99809	scaffold_5	2359635	2360806	-
1282871	-0.474771	0.642431	3.27273	2.26912	-3.32193	scaffold_5	1560553	1563539	-
1282966	0.0701075	0.96092	3.42554	3.26912	3.41313	scaffold_5	2819533	2823334	-
1282995	0.178514	0.894103	3.70778	2.26912	2.82817	scaffold_5	1969511	1969798	-
1283008	-0.474771	0.642431	2.67155	2.26912	-3.32193	scaffold_5	3009376	3011030	+
1283023	0.875562	0.48389	3.38137	-3.32193	3.41313	scaffold_5	1732783	1734318	-
1283032	0.06	0.06	-0.403733	-3.32193	-3.32193	scaffold_5	545790	545966	+
1283037	0.611245	0.581293	-2.21109	10.4931	11.2097	scaffold_5	3212207	3212653	-
1283071	-0.444473	0.743451	2.47541	3.26912	1.82817	scaffold_5	26724	27907	+
1283088	0.178514	0.894103	1.76619	2.26912	2.82817	scaffold_5	3195604	3197885	+
1283133	0.357537	0.800648	6.42735	4.59105	5.15009	scaffold_5	1901226	1903390	+
1283145	-0.101568	0.935242	2.48935	2.26912	1.82817	scaffold_5	1058269	1058739	-
1283186	-0.403424	0.781224	6.36917	4.26912	3.41313	scaffold_5	1347120	1347736	-
1283197	0.32879	0.748945	3.00808	-3.32193	1.82817	scaffold_5	3007868	3008909	+
1283238	0.06	0.06	0.788912	-3.32193	-3.32193	scaffold_5	2923354	2924239	-
1283240	-0.444473	0.743451	3.96384	3.26912	1.82817	scaffold_5	1050686	1053003	-
1283251	0.06	0.06	-3.32193	-3.32193	-3.32193	scaffold_5	1073125	1073459	+
1283274	-0.0602828	0.965369	5.33388	5.26912	5.15009	scaffold_5	730870	732716	-
1283307	0.06	0.06	-4.21109	-3.32193	-3.32193	scaffold_5	2039929	2040162	-
1283317	-0.403424	0.781224	4.86573	4.26912	3.41313	scaffold_5	2918099	2919523	-
1283359	0.0384317	0.971825	-0.88916	12.1287	12.149	scaffold_5	2963637	2964302	+
1283377	0.32879	0.748945	2.14646	-3.32193	1.82817	scaffold_5	1079919	1081327	-
1283382	-0.0864974	0.952073	4.98367	4.59105	4.41313	scaffold_5	638609	641050	+
1283405	-0.403424	0.781224	4.78327	4.26912	3.41313	scaffold_5	600702	601789	-
1283412	0.06	0.06	-0.510648	-3.32193	-3.32193	scaffold_5	585218	585835	+
1283432	-0.746366	0.501431	-1.88916	11.9415	11.0081	scaffold_5	1143828	1144172	+
1283522	7.36848e-08	1	5.59304	4.85408	4.82817	scaffold_5	175844	181214	-
1283583	-0.474771	0.642431	2.68373	2.26912	-3.32193	scaffold_5	3310763	3311674	+
1283586	0.06	0.06	1.43277	-3.32193	-3.32193	scaffold_5	2937417	2938244	-
1283600	0.06	0.06	0.918195	-3.32193	-3.32193	scaffold_5	2090728	2091152	+
1283605	0.06	0.06	-3.32193	-3.32193	-3.32193	scaffold_5	2224937	2225149	+
1283608	0.313404	0.820388	6.08008	5.07647	5.52861	scaffold_5	691140	694066	-
1283613	0.433145	0.764932	4.30461	3.85408	4.63552	scaffold_5	3298836	3299906	-
1283618	0.875562	0.48389	1.71965	-3.32193	3.41313	scaffold_5	2368292	2369366	+
1283621	0.06	0.06	1.11084	-3.32193	-3.32193	scaffold_5	2260974	2261426	-
1283659	0.875562	0.48389	5.70926	-3.32193	3.41313	scaffold_5	1757669	1758878	-
1283664	-0.720252	0.608938	1.43277	3.85408	1.82817	scaffold_5	1234476	1236576	-
1283666	0.178514	0.894103	2.68373	2.26912	2.82817	scaffold_5	2827497	2830417	+
1283670	-0.474771	0.642431	-0.626126	2.26912	-3.32193	scaffold_5	3329650	3330282	+
1283679	0.06	0.06	-3.32193	-3.32193	-3.32193	scaffold_5	968703	968924	-
1283682	0.32879	0.748945	3.16395	-3.32193	1.82817	scaffold_5	183328	186314	-
1283702	-0.552382	0.702134	-3.32193	4.85408	3.82817	scaffold_5	2341492	2341740	+
1283708	1.11245	0.440847	4.64378	3.26912	5.2876	scaffold_5	2295469	2297814	+
1283744	0.63309	0.577421	1.48935	-3.32193	2.82817	scaffold_5	422681	423888	+
1283754	7.36848e-08	1	5.32419	4.85408	4.82817	scaffold_5	471313	477129	+
1283777	0.178514	0.894103	2.21518	2.26912	2.82817	scaffold_5	755901	757460	-
1283865	-0.403424	0.781224	3.10179	4.26912	3.41313	scaffold_5	160239	161363	+
1283876	-0.101568	0.935242	2.80014	2.26912	1.82817	scaffold_5	1056358	1057923	-
1283893	0.598909	0.672767	2.16395	2.26912	3.82817	scaffold_5	1310680	1312075	+
1283915	0.655071	0.649379	5.27675	3.85408	4.99809	scaffold_5	413142	414760	-
1283923	1.08435	0.4107	2.60909	-3.32193	3.82817	scaffold_5	966981	968467	-
1283930	0.32879	0.748945	2.87637	-3.32193	1.82817	scaffold_5	2804073	2804867	+
1283946	0.32879	0.748945	1.21518	-3.32193	1.82817	scaffold_5	2725336	2726651	-
1283970	0.580531	0.651112	7.57559	5.96956	6.73506	scaffold_5	218640	228549	+
1284000	0.0931958	0.948616	4.24424	4.26912	4.41313	scaffold_5	2377733	2378647	-
1284002	-0.720252	0.608938	3.43996	3.85408	1.82817	scaffold_5	1426096	1430346	+
1284011	0.178514	0.894103	0.918195	2.26912	2.82817	scaffold_5	2354910	2355275	-
1284049	-0.444473	0.743451	1.21518	3.26912	1.82817	scaffold_5	3014628	3015455	-
1284059	0.32879	0.748945	0.312474	-3.32193	1.82817	scaffold_5	2281302	2282495	-
1284146	0.06	0.06	-0.123625	-3.32193	-3.32193	scaffold_5	2861068	2862492	+
1284172	0.25854	0.85789	3.64066	3.26912	3.82817	scaffold_5	52344	55365	+
1284178	0.451407	0.745374	4.9513	4.85408	5.52861	scaffold_5	297229	302143	+
1284185	-0.418177	0.770736	3.6218	3.85408	2.82817	scaffold_5	641065	642248	-
1284186	0.06	0.06	-0.88916	-3.32193	-3.32193	scaffold_5	1731654	1732439	-
1284196	0.32879	0.748945	3.08353	-3.32193	1.82817	scaffold_5	1727399	1728341	+
1284214	0.06	0.06	3.24012	-3.32193	-3.32193	scaffold_5	738325	739132	+
1284245	1.08435	0.4107	3.20676	-3.32193	3.82817	scaffold_5	880667	882110	+
1284283	0.261004	0.854326	6.53543	4.59105	4.99809	scaffold_5	1362114	1364994	-
1284294	-1.12564	0.392724	2.12876	3.85408	-3.32193	scaffold_5	150679	152851	-
1284304	0.178514	0.894103	1.64689	2.26912	2.82817	scaffold_5	1651013	1656788	-
1284344	-0.828781	0.496118	1.03684	3.26912	-3.32193	scaffold_5	1465769	1466293	-
1284353	0.32879	0.748945	3.13764	-3.32193	1.82817	scaffold_5	1803207	1805251	-
1284394	0.63309	0.577421	1.31247	-3.32193	2.82817	scaffold_5	2621127	2624815	+
1284440	0.655071	0.649379	4.4073	3.85408	4.99809	scaffold_5	1593311	1594236	-
1284448	-0.828781	0.496118	3.60909	3.26912	-3.32193	scaffold_5	1111032	1114126	+
1284514	0.06	0.06	2.91819	-3.32193	-3.32193	scaffold_5	2090456	2090674	+
1284524	0.162249	0.911088	3.94373	3.85408	4.15009	scaffold_5	379455	381354	+
1284527	0.06	0.06	-0.88916	-3.32193	-3.32193	scaffold_5	1602560	1602923	-
1284581	0.32879	0.748945	-0.510648	-3.32193	1.82817	scaffold_5	2133176	2133734	-
1284600	-0.474771	0.642431	3.23186	2.26912	-3.32193	scaffold_5	1083062	1084244	-
1284609	-0.101568	0.935242	3.39624	2.26912	1.82817	scaffold_5	2793246	2793755	-
1284628	0.06	0.06	0.248343	-3.32193	-3.32193	scaffold_5	1280537	1280791	+
1284659	-0.474771	0.642431	0.0368393	2.26912	-3.32193	scaffold_5	2263227	2264670	-
1284667	0.06	0.06	0.543799	-3.32193	-3.32193	scaffold_5	1191131	1193018	+
1284682	0.405441	0.770526	1.93866	2.26912	3.41313	scaffold_5	1769398	1771008	+
1284715	0.06	0.06	4.19405	-3.32193	-3.32193	scaffold_5	2268839	2269817	-
1284739	-0.444473	0.743451	1.76619	3.26912	1.82817	scaffold_5	1382298	1382983	+
1284749	-0.474771	0.642431	3.62812	2.26912	-3.32193	scaffold_5	112380	114451	-
1284759	0.12612	0.909471	-3.21109	9.71206	9.83939	scaffold_5	2049447	2049749	-
1284802	0.06	0.06	0.788912	-3.32193	-3.32193	scaffold_5	1226173	1226815	-
1284824	-0.18886	0.896173	4.58981	3.85408	3.41313	scaffold_5	3393863	3395125	+
1284828	0.302164	0.820797	6.89351	5.59105	5.99809	scaffold_5	2084760	2086459	-
1284842	-0.818656	0.557884	5.1983	5.72855	4.41313	scaffold_5	2934908	2937226	+
1284870	0.405441	0.770526	3.62812	2.26912	3.41313	scaffold_5	865036	866193	+
1284901	-0.689355	0.548035	-3.32193	9.15176	8.27111	scaffold_5	3328402	3328719	+
1284935	0.32879	0.748945	3.96384	-3.32193	1.82817	scaffold_5	2422407	2424418	+
1284939	-0.950538	0.506991	5.38882	4.26912	1.82817	scaffold_5	1960643	1961783	-
1284942	0.0701075	0.96092	4.20676	3.26912	3.41313	scaffold_5	2892726	2895332	-
1284948	-0.444473	0.743451	3.10179	3.26912	1.82817	scaffold_5	749646	751143	+
1285018	-0.15499	0.912222	2.91819	3.26912	2.82817	scaffold_6	1684289	1686003	-
1285023	-0.444473	0.743451	5.48414	3.26912	1.82817	scaffold_6	3060325	3061458	+
1285032	-0.828781	0.496118	3.09269	3.26912	-3.32193	scaffold_6	1554269	1556343	+
1285044	-0.101568	0.935242	1.24834	2.26912	1.82817	scaffold_6	103910	104704	+
1285086	0.32879	0.748945	-0.626126	-3.32193	1.82817	scaffold_6	87157	88177	-
1285098	-0.101568	0.935242	2.82233	2.26912	1.82817	scaffold_6	1806464	1807379	+
1285125	0.06	0.06	3.31247	-3.32193	-3.32193	scaffold_6	1315320	1316275	-
1285158	0.06	0.06	-0.0411632	-3.32193	-3.32193	scaffold_6	430809	431935	-
1285189	0.32879	0.748945	0.432768	-3.32193	1.82817	scaffold_6	1556505	1556922	+
1285242	-0.101568	0.935242	3.5571	2.26912	1.82817	scaffold_6	1327108	1328395	-
1285249	0.06	0.06	0.432768	-3.32193	-3.32193	scaffold_6	1213134	1214224	+
1285267	0.06	0.06	2.95884	-3.32193	-3.32193	scaffold_6	1120925	1122085	-
1285294	-0.453275	0.704071	6.8684	7.82371	7.22048	scaffold_6	2512040	2514907	-
1285331	0.32879	0.748945	1.11084	-3.32193	1.82817	scaffold_6	232649	233649	-
1285347	0.931193	0.507041	2.1983	4.26912	5.73506	scaffold_6	583330	583750	+
[truncated: 9,843 more rows]
