# Supplementary material for: The RNAi Mechanism Regulates a New Exonuclease Gene Involved in the Virulence of Mucorales
Source: Preprints.org preprint supplement (doi:10.20944/preprints202101.0277.v1), 2021-01-14
Supplement: Supplementary file 2 [file TableS2.xlsx]

## Sheet: Sheet1
GeneID	log2FC	pvalue	dcl1dcl2_log2CPM	Av_log2CPM	Vi_log2CPM	seq	start	end	strand	kogid	kogdefline	kogClass	kogGroup	iprId	iprDesc	domainDb	domainId	domainDesc	numHits	domainStarts	domainEnds	score	gotermId	goName	gotermType	goAcc	ecNum	definition	catalyticActivity	cofactors	associatedDiseases	pathway	pathway_class	pathway_type	signalPP	Mucci2GeneID
1006557	4.6	0.000929834	2.5	5.27	13.8	scaffold_1	1232659	1234358	+					IPR001878|IPR001878|IPR001878	Zinc finger, CCHC-type|Zinc finger, CCHC-type|Zinc finger, CCHC-type	ProSiteProfiles|SMART|SUPERFAMILY	PS50158|SM00343|SSF57756	Zinc finger CCHC-type profile.|zinc finger|\N	1|2|1	296,|273,295,|271,	309,|289,311,|313,	9.686|0.7,0.027|2.24E-7	2175|5939	nucleic acid binding|zinc ion binding	molecular_function|molecular_function	GO:0003676|GO:0008270										163977
1009423	-2.76	0.0340492	-3.32	9.2	5.29	scaffold_1	1753458	1754030	-
1023308	4.56	0.00113412	-0.3	3.27	12.63	scaffold_1	4670364	4671424	-																											165115
1036309	-2.87	0.0480299	-4.21	6.44	-3.32	scaffold_11	842275	843399	-					IPR007087|\N|\N|IPR007087|IPR007087|IPR015880|IPR003604	Zinc finger, C2H2|\N|\N|Zinc finger, C2H2|Zinc finger, C2H2|Zinc finger, C2H2-like|Zinc finger, U1-type	HMMPfam|HMMPfam|HMMPfam|ProSitePatterns|ProSiteProfiles|SMART|SMART	PF00096|PF12874|PF13894|PS00028|PS50157|SM00355|SM00451	Zinc finger, C2H2 type|Zinc-finger of C2H2 type|C2H2-type zinc finger|Zinc finger C2H2 type domain signature.|Zinc finger C2H2 type domain profile.|zinc finger|U1-like zinc finger	1|2|3|7|3|7|3	289,|196,244,|57,106,150,|11,59,108,151,197,245,291,|57,195,289,|9,57,106,149,195,243,289,|54,103,286,	312,|215,263,|80,129,172,|32,80,129,172,218,266,312,|80,223,315,|32,80,129,172,218,266,312,|87,136,314,	0.011|5.2E-4,0.027|0.014,0.84,0.36|-,-,-,-,-,-,-|9.369,8.995,11.032|2.4,0.21,0.19,2.4,0.52,2.7,0.012|1.7,5.8,2.4	2175|5939|3827	nucleic acid binding|zinc ion binding|intracellular	molecular_function|molecular_function|cellular_component	GO:0003676|GO:0008270|GO:0005622										115220
1037754	-2.69	0.0376371	-4.21	9.3	5.53	scaffold_12	264589	266114	+																											164679
1039618	-3.39	0.0120258	0.49	9.08	3.83	scaffold_12	671837	673630	+																											112283
1127260	2.84	0.023968	-2.21	10.86	14.66	scaffold_5	2468422	2470039	+																											113847
1127270	3.83	0.00420301	-2.63	5.73	11.49	scaffold_5	2470562	2471769	+																											113848
1146294	3.01	0.0281887	-1.21	3.27	8.06	scaffold_6	2971669	2972561	-
1152442	-3.85	0.00400641	-1.21	11.48	5.64	scaffold_7	946696	947486	-																											184270
1249930	3.81	0.00545062	-4.21	3.27	9.54	scaffold_2	2038711	2039247	-	KOG3105|KOG3105	DNA-binding centromere protein B (CENP-B)|DNA-binding centromere protein B (CENP-B)	Chromatin structure and dynamics |Cell cycle control, cell division, chromosome partitioning	INFORMATION STORAGE AND PROCESSING|METABOLISM
1255914	3.51	0.00773271	-1.89	6.27	11.34	scaffold_2	3168937	3169833	+																											108478
1264797	3.25	0.0163728	-4.21	3.85	8.84	scaffold_5	2471584	2471742	+
1271676	4.54	0.00109961	-1.21	3.85	12.32	scaffold_1	5534868	5535515	-																											112363
1273576	3.99	0.00332363	-2.21	4.27	10.64	scaffold_1	3844806	3845395	-																											112919
1277479	4.21	0.002108	-1.89	4.27	11.2	scaffold_3	1106689	1106970	-																											105886
1281942	4.54	0.00101839	0.25	5.27	13.29	scaffold_4	905878	906171	+
1288409	-3.07	0.0161861	0.54	13.32	9.08	scaffold_7	2217611	2219068	-																											162950
1291374	3.08	0.0247344	3.31	3.27	8.17	scaffold_10	589361	592671	+	KOG2242	Scaffold/matrix specific factor hnRNP-U/SAF-A, contains SPRY domain	RNA processing and modification	INFORMATION STORAGE AND PROCESSING	IPR003877|IPR001870|IPR003877|IPR013320	SPRY domain|B30.2/SPRY domain|SPRY domain|Concanavalin A-like lectin/glucanase domain	HMMPfam|ProSiteProfiles|SMART|SUPERFAMILY	PF00622|PS50188|SM00449|SSF49899	SPRY domain|B30.2/SPRY domain profile.|Domain in SPla and the RYanodine Receptor.|\N	1|1|1|1	532,|467,|532,|507,	655,|660,|657,|658,	1.7E-25|13.881|2.8E-29|3.48E-23														114277
1310568	-3.38	0.00955364	3.02	11.79	6.96	scaffold_7	1711395	1714773	-	KOG1336	Monodehydroascorbate/ferredoxin reductase	General function prediction only	POORLY CHARACTERIZED	IPR001327|IPR006067|IPR005117|IPR007419|IPR023753|\N|IPR006066|IPR017941|IPR017941|\N|IPR005117|\N|IPR012744|IPR012748	Pyridine nucleotide-disulphide oxidoreductase, NAD-binding domain|Nitrite/sulphite reductase 4Fe-4S domain|Nitrite/Sulfite reductase ferredoxin-like domain|BFD-like [2Fe-2S]-binding domain|Pyridine nucleotide-disulphide oxidoreductase, FAD/NAD(P)-binding domain|\N|Nitrite/sulphite reductase iron-sulphur/sirohaem-binding site|Rieske [2Fe-2S] iron-sulphur domain|Rieske [2Fe-2S] iron-sulphur domain|…	HMMPfam|HMMPfam|HMMPfam|HMMPfam|HMMPfam|HMMPfam|ProSitePatterns|ProSiteProfiles|SUPERFAMILY|SUPERFAMILY|SUPERFAMILY|SUPERFAMILY|TIGRFAM|TIGRFAM	PF00070|PF01077|PF03460|PF04324|PF07992|PF13806|PS00365|PS51296|SSF50022|SSF51905|SSF55124|SSF56014|TIGR02374|TIGR02378	Pyridine nucleotide-disulphide oxidoreductase|Nitrite and sulphite reductase 4Fe-4S domain|Nitrite/Sulfite reductase ferredoxin-like half domain|BFD-like [2Fe-2S] binding domain|Pyridine nucleotide-disulphide oxidoreductase|Rieske-like [2Fe-2S] domain|Nitrite and sulfite reductases iron-sulfur/siroheme-binding site.|Rieske [2Fe-2S] iron-sulfur domain profile.|\N|\N|\N|\N|nitri_red_nirB: nitrite r…	1|1|1|1|1|1|1|1|1|2|1|1|1|1	138,|640,|568,|427,|16,|868,|687,|868,|867,|21,94,|524,|641,|1,|868,	204,|780,|628,|478,|287,|977,|703,|978,|988,|127,312,|635,|812,|808,|979,	5.0E-13|3.3E-28|3.6E-11|4.5E-16|1.3E-20|4.4E-20|-|16.631|6.15E-29|1.56E-7,3.4E-28|7.52E-20|5.89E-47|1.1E-254|2.5E-28	9710|23919|4283|12251|24783|6556|17658|23920	oxidoreductase activity|FAD binding|electron transport|heme binding|iron-sulfur cluster binding|nitrite reductase [NAD(P)H] activity|nitrate assimilation|NADP binding	molecular_function|molecular_function|biological_process|molecular_function|molecular_function|molecular_function|biological_process|molecular_function	GO:0016491|GO:0050660|GO:0006118|GO:0020037|GO:0051536|GO:0008942|GO:0042128|GO:0050661										73657
1317930	-2.8	0.0485795	4.18	6.97	1.83	scaffold_1	3848539	3854772	-					\N|IPR001054|IPR027417|IPR029787	\N|Adenylyl cyclase class-3/4/guanylyl cyclase|P-loop containing nucleoside triphosphate hydrolase|Nucleotide cyclase	HMMPfam|ProSiteProfiles|SUPERFAMILY|SUPERFAMILY	PF13191|PS50125|SSF52540|SSF55073	AAA ATPase domain|Guanylate cyclase domain profile.|\N|\N	1|1|3|3	664,|33,|655,821,893,|28,287,459,	918,|92,|733,846,1000,|151,347,635,	6.5E-7|9.04|1.61E-14,1.61E-14,1.61E-14|1.13E-11,1.13E-11,7.69E-12	5323|6795|10044	intracellular signaling cascade|cyclic nucleotide biosynthetic process|phosphorus-oxygen lyase activity	biological_process|biological_process|molecular_function	GO:0007242|GO:0009190|GO:0016849										112917
1331033	-2.81	0.0280083	2.92	10.41	6.53	scaffold_6	2667891	2670523	+	KOG2195|KOG2195|KOG2195	Transferrin receptor and related proteins containing the protease-associated (PA) domain|Transferrin receptor and related proteins containing the protease-associated (PA) domain|Transferrin receptor and related proteins containing the protease-associated (PA) domain	Posttranslational modification, protein turnover, chaperones |Inorganic ion transport and metabolism |General function prediction only	CELLULAR PROCESSES AND SIGNALING|METABOLISM|POORLY CHARACTERIZED	IPR007365|IPR007484|IPR007365|\N|\N	Transferrin receptor-like, dimerisation domain|Peptidase M28|Transferrin receptor-like, dimerisation domain|\N|\N	HMMPfam|HMMPfam|SUPERFAMILY|SUPERFAMILY|SUPERFAMILY	PF04253|PF04389|SSF47672|SSF52025|SSF53187	Transferrin receptor-like dimerisation domain|Peptidase family M28|\N|\N|\N	1|1|1|1|2	653,|414,|624,|157,|103,384,	774,|588,|774,|402,|150,623,	2.3E-22|3.1E-18|3.53E-34|5.1E-69|2.36E-76,2.36E-76	4639|5905|18763	proteolysis|peptidase activity|glutamate carboxypeptidase II activity	biological_process|molecular_function|molecular_function	GO:0006508|GO:0008233|GO:0043275	3.4.17.21	Glutamate carboxypeptidase II.	Release of an unsubstituted, C-terminal glutamyl residue, typically from Ac-Asp-Glu or folylpoly-gamma-glutamates.	Zinc.	\N	\N	\N	\N		137620
1331363	-2.96	0.0325174	3.13	7.7	2.83	scaffold_7	39197	41258	-					IPR012571	Mitochondrial distribution and morphology protein family 31/32, fungi	HMMPfam	PF08118	Yeast mitochondrial distribution and morphology (MDM) proteins	2	2,316,	270,527,	5.0E-57,8.2E-42	3935|5102	mitochondrial inner membrane|mitochondrion organization and biogenesis	cellular_component|biological_process	GO:0005743|GO:0007005										143091
1336742	-4.22	0.0018356	0.96	13.31	6.64	scaffold_12	768084	769352	-	KOG0543	FKBP-type peptidyl-prolyl cis-trans isomerase	Posttranslational modification, protein turnover, chaperones	CELLULAR PROCESSES AND SIGNALING	IPR001179|IPR001440|\N|IPR019734|IPR001179|IPR013026|IPR019734|\N|\N	Peptidyl-prolyl cis-trans isomerase, FKBP-type, domain|Tetratricopeptide TPR1|\N|Tetratricopeptide repeat|Peptidyl-prolyl cis-trans isomerase, FKBP-type, domain|Tetratricopeptide repeat-containing domain|Tetratricopeptide repeat|\N|\N	HMMPfam|HMMPfam|HMMPfam|ProSiteProfiles|ProSiteProfiles|ProSiteProfiles|SMART|SUPERFAMILY|SUPERFAMILY	PF00254|PF00515|PF13414|PS50005|PS50059|PS50293|SM00028|SSF48452|SSF54534	FKBP-type peptidyl-prolyl cis-trans isomerase|Tetratricopeptide repeat|TPR repeat|TPR repeat profile.|FKBP-type peptidyl-prolyl cis-trans isomerase domain profile.|TPR repeat region circular profile.|Tetratricopeptide repeats|\N|\N	1|1|1|2|1|1|3|1|1	29,|219,|135,|185,219,|34,|185,|136,185,219,|133,|13,	120,|246,|215,|218,252,|123,|252,|169,218,252,|276,|125,	2.3E-24|5.5E-4|1.7E-10|6.962,10.62|24.289|16.739|66.0,0.0048,0.0042|4.69E-27|7.27E-33	4591|2233|2975|12948|17567	protein folding|peptidyl-prolyl cis-trans isomerase activity|cyclophilin|FK506-sensitive peptidyl-prolyl cis-trans isomerase|cyclophilin-type peptidyl-prolyl cis-trans isomerase activity	biological_process|molecular_function|molecular_function|molecular_function|molecular_function	GO:0006457|GO:0003755|GO:0004600|GO:0030051|GO:0042027	5.2.1.8	Peptidylprolyl isomerase.	Peptidylproline (omega=180) = peptidylproline (omega=0).	\N	\N	\N	\N	\N		145373
1337840	3.73	0.00546941	-1.4	4.85	10.53	scaffold_1	1276590	1277320	-																											115792|82430
1339857	-3.1	0.0153116	1.81	13.05	8.75	scaffold_2	2428348	2430361	-																											161600
1340335	4.43	0.00139835	-1.21	3.27	11.38	scaffold_2	3975746	3977098	+																											161124
1341846	-3.05	0.0169647	1.74	13.15	8.95	scaffold_3	4290240	4292252	-																											168039
1343552	-2.97	0.0406081	-3.32	6.59	-3.32	scaffold_5	931846	932241	+
1348232	-3.61	0.00980369	-3.32	8.34	1.83	scaffold_15	59185	59523	+																											115828
1348513	-3	0.018526	2.34	13.07	8.95	scaffold_1	137746	139128	-																											163658
1367324	-3.1	0.0278115	-1.89	7.44	1.83	scaffold_3	1226385	1227355	-	KOG0849	Transcription factor PRD and related proteins, contain PAX and HOX domains	Transcription	INFORMATION STORAGE AND PROCESSING																							76250
1372094	-3.08	0.017117	5.77	11	6.69	scaffold_3	4289083	4290415	+	KOG3173	Predicted Zn-finger protein	General function prediction only	POORLY CHARACTERIZED										5939|2176	zinc ion binding|DNA binding	molecular_function|molecular_function	GO:0008270|GO:0003677										115961
1372753	-3.2	0.0127597	-4.21	14.58	10.12	scaffold_3	4648854	4649921	+	KOG1075	FOG: Reverse transcriptase	General function prediction only	POORLY CHARACTERIZED																							115852
1372768	-3.18	0.0155045	4.16	9.89	5.29	scaffold_3	4668413	4671001	+	KOG1924|KOG1924	RhoA GTPase effector DIA/Diaphanous|RhoA GTPase effector DIA/Diaphanous	Signal transduction mechanisms |Cytoskeleton	CELLULAR PROCESSES AND SIGNALING|CELLULAR PROCESSES AND SIGNALING
1376508	-3.07	0.020248	0.25	9.3	4.83	scaffold_4	2203833	2205083	-	KOG1721	FOG: Zn-finger	General function prediction only	POORLY CHARACTERIZED										2175|5939|3827	nucleic acid binding|zinc ion binding|intracellular	molecular_function|molecular_function|cellular_component	GO:0003676|GO:0008270|GO:0005622										104957
1378770	2.92	0.0379172	1.28	2.27	7.38	scaffold_4	3604589	3605751	+
1381717	-2.85	0.0299732	-1.4	9.09	5	scaffold_5	933369	933894	+
1383060	4.29	0.00190579	-2.21	3.27	10.8	scaffold_5	1749136	1749541	-																											113608
1383737	3.74	0.00711904	-3.32	2.27	8.86	scaffold_5	2114169	2114507	+
1387915	-3.23	0.0120602	-3.21	14.52	10.01	scaffold_6	1215614	1216629	+																											159765
1394162	2.69	0.0311119	3.75	10.16	13.73	scaffold_7	1876072	1876994	-
1396195	4.62	0.00088319	-1.04	6.27	14.88	scaffold_8	336927	337496	-																										0.834	107356
1397725	-3.83	0.00536204	-2.63	9.28	2.83	scaffold_8	1255907	1256413	-
1432307	-2.87	0.0428195	-4.21	7.08	1.83	scaffold_1	3058583	3059009	+																											164535
1434364	-3.23	0.0159164	0.25	9.04	4.15	scaffold_3	188307	190108	+																											168241
1434453	-2.83	0.0455611	0.6	7.02	1.83	scaffold_3	534886	536013	-
1436639	-3.21	0.0127643	-2.63	12.84	8.35	scaffold_4	4093168	4095764	-																										0.102	84372
1437041	-2.7	0.0376082	-2.21	9.21	5.41	scaffold_5	935072	936075	+																											113332
1439187	3.9	0.00494063	0.74	2.27	9.23	scaffold_7	2066955	2068414	-																											81415
1441239	4.46	0.00142557	-1.21	2.27	11.2	scaffold_13	719429	720928	+																											115791
1441636	4.53	0.00104457	0.43	5.08	13.08	scaffold_1	769664	771779	+																											111237
1443009	-3.09	0.0220415	1.72	8.55	3.83	scaffold_1	5082421	5087849	+
1443721	-3.34	0.0102131	-1.89	12.15	7.41	scaffold_2	1663475	1665366	+																											161837
1445044	4.6	0.000970059	2.56	4.59	13.5	scaffold_3	943736	945193	-														2175|5939	nucleic acid binding|zinc ion binding	molecular_function|molecular_function	GO:0003676|GO:0008270										76158
1448240	2.68	0.0408384	2.18	5.08	8.86	scaffold_5	1713235	1714235	+														2175|3827|4301|6068	nucleic acid binding|intracellular|nucleobase, nucleoside, nucleotide and nucleic acid metabolic process|3'-5' exonuclease activity	molecular_function|cellular_component|biological_process|molecular_function	GO:0003676|GO:0005622|GO:0006139|GO:0008408										113596
1448496	4.53	0.00107701	-0.89	4.59	12.68	scaffold_5	2498929	2500479	+																											113861
1448926	4.48	0.00127959	-1.89	3.27	11.62	scaffold_6	482444	483538	-																											106387
1451625	2.95	0.0353347	2.98	2.27	7.44	scaffold_9	700976	702799	+
1452086	-2.88	0.0303134	-3.21	8.66	4.41	scaffold_10	634927	635865	-																											114266
1453486	-3.4	0.012594	1.67	8.79	3.41	scaffold_1	1264402	1269868	-																											163987
1453488	4.4	0.00150743	-1.21	3.27	11.21	scaffold_1	1274872	1276296	+
1453737	-3.12	0.0206653	1.4	8.61	3.83	scaffold_1	2115013	2120479	-
1453978	-3.82	0.00622568	1.6	8.76	1.83	scaffold_1	2920338	2925995	-																											164495
1454192	-3.42	0.0121539	1.57	8.82	3.41	scaffold_1	3690230	3695698	+
1454748	3.74	0.0047011	-0.12	8.05	13.5	scaffold_2	47944	49770	-
1454749	3.99	0.00303771	-0.21	5.73	11.85	scaffold_2	49460	50802	-
1458487	-3.39	0.0128242	1.62	8.78	3.41	scaffold_4	3607153	3612620	+
1458774	-2.81	0.0343795	1.46	8.55	4.41	scaffold_5	33294	38761	-
1460941	-3.86	0.004274	4.98	10.45	4.41	scaffold_7	809305	811849	+	KOG1844	PHD Zn-finger proteins	General function prediction only	POORLY CHARACTERIZED										3838|3727|5939	nucleus|protein binding|zinc ion binding	cellular_component|molecular_function|molecular_function	GO:0005634|GO:0005515|GO:0008270										163371
1463171	-3.19	0.0183126	1.37	8.71	3.83	scaffold_12	227647	233440	+
1463463	3.99	0.00405582	-2.21	2.27	9.44	scaffold_13	580189	581590	-
1463972	-3.12	0.0186318	-3.32	9.23	4.64	scaffold_1	669729	670292	-
1466500	-2.8	0.0262688	0.18	12.51	8.71	scaffold_11	436656	438325	-																											167295
1466884	3.82	0.00447061	-0.04	5.08	10.9	scaffold_12	776436	777032	-																											112324
1467250	4.21	0.00248581	-1.04	2.27	10.05	scaffold_13	716476	717318	+																											167897
1468950	3.45	0.0109666	3.93	3.85	9.19	scaffold_2	3985358	3985998	+	KOG1198|KOG1198	Zinc-binding oxidoreductase|Zinc-binding oxidoreductase	Energy production and conversion |General function prediction only	METABOLISM|POORLY CHARACTERIZED										19203|19290|19347|24588	F420H2 dehydrogenase activity|sulfur oxygenase reductase activity|malolactic enzyme activity|regulation of oxidoreductase activity	molecular_function|molecular_function|molecular_function|biological_process	GO:0043738|GO:0043826|GO:0043883|GO:0051341	1.-.-.-	Oxidoreductases.	\N	\N	\N	\N	\N	\N		91027
1470891	4	0.00397739	-1.89	2.27	9.46	scaffold_3	4356080	4356961	-	KOG0586	Serine/threonine protein kinase	General function prediction only	POORLY CHARACTERIZED										3043|3736|4602|3045|3052	protein kinase activity|ATP binding|protein amino acid phosphorylation|protein serine/threonine kinase activity|protein kinase CK2 activity	molecular_function|molecular_function|biological_process|molecular_function|molecular_function	GO:0004672|GO:0005524|GO:0006468|GO:0004674|GO:0004682										115937
1473517	4.26	0.00183982	-0.21	4.59	11.61	scaffold_5	2287593	2288700	+																											166107
1473877	3.05	0.016753	-0.89	8.88	13.05	scaffold_5	3215071	3216446	-
1474613	-3.04	0.0232447	1.49	8.71	4.15	scaffold_6	1674830	1680138	+
1475895	-3.51	0.00767099	1.28	11.34	6.22	scaffold_7	1715095	1718212	-	KOG0535	Sulfite oxidase, molybdopterin-binding component	Energy production and conversion	METABOLISM										4283|12251|21336|9710|13044	electron transport|heme binding|transition metal ion binding|oxidoreductase activity|molybdenum ion binding	biological_process|molecular_function|molecular_function|molecular_function|molecular_function	GO:0006118|GO:0020037|GO:0046914|GO:0016491|GO:0030151										81522
1476687	-3.76	0.00463671	3.95	12.35	6.78	scaffold_8	1261184	1262790	+	KOG4200	Uncharacterized conserved protein	Function unknown	POORLY CHARACTERIZED																							107677
1476848	-3.11	0.0151544	5.75	13.49	9.19	scaffold_8	1808521	1810316	-																											107859
